# Supplementary material
Source: PubMed Central journal article supplement (PMC7918180)
Supplement: bloodBLD2020006115-suppl1.pdf [file bloodBLD2020006115-suppl1.pdf]

# Supplementary Materials for: Transcriptional profile of platelets and iPSC-derived megakaryocytes from whole genome and RNA sequencing

Kai Kammers<sup>1,\*</sup>, Margaret A Taub<sup>2,\*</sup>, Benjamin Rodriguez<sup>3</sup>, Lisa R Yanek<sup>4</sup>, Ingo Ruczinski<sup>2</sup>, Joshua Martin<sup>4</sup>, Kanika Kanchan<sup>5</sup>, Alexis Battle<sup>6</sup>, Linzhao Cheng<sup>7</sup>, Zack Z. Wang<sup>7</sup>, Andrew D. Johnson<sup>3</sup>, Jeffrey T Leek<sup>2</sup>, Nauder Faraday<sup>4</sup>, Lewis C Becker<sup>4</sup>, Rasika A Mathias<sup>4,5</sup>.

*\* equal contribution from both authors.*

<sup>1</sup> Division of Biostatistics and Bioinformatics, Department of Oncology, Sidney Kimmel Comprehensive Cancer Center, Johns Hopkins University School of Medicine, Baltimore, MD, USA

<sup>2</sup> Department of Biostatistics, Johns Hopkins Bloomberg School of Public Health, Baltimore, MD, USA

<sup>3</sup> NHLBI Population Sciences Branch, The Framingham Heart Study, Framingham, MA, USA

<sup>4</sup> The GeneSTAR Research Program, Johns Hopkins University School of Medicine, Baltimore, MD, USA

<sup>5</sup> Division of Allergy and Clinical Immunology, Johns Hopkins University School of Medicine, Baltimore, MD, USA

<sup>6</sup> Department of Biomedical Engineering, Johns Hopkins University, Baltimore, MD, USA

<sup>7</sup> Division of Hematology and Institute for Cell Engineering, Johns Hopkins University School of Medicine, Baltimore, MD, USA

Corresponding author E-mail: [rmathias@jhmi.edu](mailto:rmathias@jhmi.edu)

## Supplementary Methods

### Study Participants

The GeneSTAR study population is constituted of apparently healthy siblings identified from probands with coronary artery disease prior to age 60, spouses of the siblings, and their adult offspring (>21 years of age), with a total n > 4000 participants<sup>1-3</sup>. The study was approved by the Institutional Review Board of the Johns Hopkins Medical Institutions. Written informed consent was obtained from all participants.

**iPSC-derived MK sample:** Subjects (n=251) were included if they were members of the original GeneSTAR Study population and were over 21 years of age. Subjects were excluded if they had developed diabetes, cardiovascular disease, or any bleeding disorder, AIDS, advanced cancer, cancer under treatment or autoimmune diseases under treatment since study entry.

**Platelet sample:** Subjects (n=307) were included if they had participated in the prior GeneSTAR study of platelet aggregation<sup>3</sup>, were healthy and not pregnant, were over 21 years of age, and were able to participate along with a full sibling. Subjects were excluded if they had cardiovascular disease, any bleeding disorder, AIDS, advanced cancer, cancer under treatment, or autoimmune diseases under treatment.

Samples underwent quality control as described in Methods and Results to determine the final set for analysis, and clinical characteristics are shown by race and tissue type for each of the final included samples in **Supplementary Table S1** (MKs, n=185: 84 AAs, 101 EAs; Platelets, n=290: 110 AAs, 180 EAs).

### Generation of iPSC and derived MKs

The protocols used to generate the iPSCs and derive MKs are described in detail by Liu et al<sup>4</sup>. Briefly, iPSC lines were reprogrammed from peripheral blood mononuclear cells using non-integrating episomal vectors. After establishment, they were all expanded in Essential 8 medium on either Matrigel (1:30; BD Biosciences, San Diego, CA, <http://www.bdbiosciences.com>) or vitronectin (5 µg/cm<sup>2</sup>, Life Technologies). Human iPSCs were differentiated into definitive CD34+CD45+ hematopoietic progenitor cells (HPCs), using the “spin-embryoid body” (spin-EB) method in feeder- and serum-free conditions. Single iPSCs were suspended in serum-free medium (SFM). We used Food and Drug Administration (FDA)-approved pharmacological agents to replace thrombopoietin (TPO) and bovine serum albumin (BSA) in the culture medium, an important factor for future clinical applications<sup>4</sup>. On day 14, the suspended cells were harvested and seeded for MK culture, generating a cell population enriched for CD41+CD42a+ MKs. Flow cytometry was performed as described previously<sup>4</sup>. Briefly, single cells from EB culture were harvested, and labeled with anti-human CD34-PE (Miltenyi Biotec), CD45-Alexa Fluor 700 (eBioscience), CD41-APC (BD Biosciences), CD42a-eFluor 450 (eBioscience), and CD42b-FITC (eBioscience). All samples were analyzed with LSRII flow cytometer (BD Biosciences). Ig isotype controls were used as the control for flow cytometry in each experiment. There is variability in the percent CD41<sup>+</sup>CD42a<sup>+</sup> MKs in MK pellets of our iPSCs (see **Supplementary Table S1**) which is accounted for in the transcriptomic analysis using percent CD41<sup>+</sup>CD42a<sup>+</sup> MKs as a covariate in the model, as described below.

## **Genotyping protocol, genotype calling, and data quality**

To perform this eQTL analysis, we leveraged the whole genome sequence (WGS) data available through the NHLBI's Trans Omics for Precision Medicine (TOPMed) <sup>5</sup> program. WGS was performed to an average depth of 38X using DNA isolated from blood, PCR-free library construction, and Illumina HiSeq X technology. Details for variant calling and quality control are described in Taliun et al. <sup>5</sup> For this analysis, only the GeneSTAR samples in Freeze 6a (August 2018) were included (n=1755). For the eQTL analysis, we retained all SNPs that are located on autosomes with at least 2 samples for each genotype and a call rate greater than 80%.

### **RNA isolation, library preparation, and sequencing**

After thawing the MK pellets, Quick-RNA™ MicroPrep (Zymo Research, Cat# R1050) was used for total RNA isolation following the manufacturer's protocols. Platelet samples were prepared from whole blood specimens that were centrifuged and treated with leukocyte-depletion beads, with platelets separated from whole blood cells over a column and washed (Miltenyi Biotec). EDTA was then added and samples were spun again to pellets. After adding 1ml Qiazol (Trizol), samples were frozen at -80. Phenol chloroform was added to frozen samples, which were then spun. The top layer was then pulled off and treated with the RNeasy clean-up kit by Qiagen, with modifications. An Agilent BioAnalyzer was used for quality control prior to library creation, with RIN (RNA Integrity Number) over 8.0.

TruSeq RNA Library Preparation Kit v2 (Illumina, Cat# RS-122-2001 and RS-122-2002) was used to generate libraries following the manufacturer's procedures. Specifically, Poly-A RNA was first purified from 10-200 ng RNA, fragmented to about 150-200 nucleotides in length, and then

converted to cDNA. End repair was performed to remove 3' end overhangs and fill in 5' overhangs; next an "A" base was added to the 3' end for adaptor ligation and PCR amplification was performed. The resulting library was quantified and quality checked on an Agilent BioAnalyzer using DNA 1000 chips. High sensitivity chips were used for further quality control to ensure adequate concentration and optimal fragment size. Libraries were uniquely barcoded and pooled for sequencing.

DNA sequencing was performed on an Illumina® HiSeq 2500 instrument using standard protocols for paired end 100bp sequencing. Samples were multiplexed in groups of four samples per sequencing lane. Average yield was ~15 Gb of raw sequencing data per lane, or ~300 million reads per lane. As per Illumina's recommendation, 3% PhiX was added to each lane as a control, and to assist the analysis software with any library diversity issues.

### **RNA-seq data preprocessing**

A detailed overview of the data processing is presented in **Figure 1**. RNA-sequencing reads were aligned to the human genome (UCSC, hg19) using the spliced-read mapper *HISAT2*<sup>6</sup> in default mode (version 2.0.1). We used *StringTie*<sup>7</sup> (version 1.3.1c) to assemble and quantify RNA-seq alignments into full-length transcripts representing multiple splice variants for each gene loci including the *de novo* assembly option and the UCSC reference annotation genes.gtf (version archive-2014-06-02-13-47-56). Transcript abundances were quantified in terms of FPKM (fragments per kilobase of transcript per million reads sequenced). For statistical downstream analyses, we integrated the results from *StringTie* into the software environment R (version 3.5.1)<sup>8</sup> and then used the software package *Ballgown*<sup>9</sup> (version 2.12.0), a statistical backend

for *HISAT-StringTie* suite<sup>10</sup>, for efficient data storage, processing, and analysis. We ran the program *gffcompare*<sup>11</sup> to obtain gene symbols for de-novo transcripts that map to known genes stored in the reference annotation, and all subsequent analyses were carried out on a gene level. To aggregate transcript abundances that belong to the same gene, given by the gene symbol, we used the built-in function *gexpr* of the Ballgown package. De-novo transcripts that were not associated with a known gene were dropped from further analysis. Genes with median FPKM across all samples less than or equal to 1 (for MKs) or 0.3 (for platelets) were excluded (the lower cutoff for platelets is similar to prior studies, e.g., Eicher et al.<sup>12</sup> and Londin et al.<sup>13</sup>). Next, we performed a variance stabilizing transformation of the filtered FPKM measurements. If  $Y_{ij}$  is the FPKM expression level of gene  $i$  in sample  $j$ , we used expression levels  $E_{ij} = \log_2(Y_{ij}+1)$  for all downstream analyses.

### **Quality control of RNA-seq and WGS data**

**iPSC-derived MKs:** The RNA-sequencing data set was collected in 10 batches totaling 233 MK samples. We removed (i) 14 samples that were technical duplicates used to assess the integrity of the MK generation as previously described<sup>14</sup>, (ii) 25 samples that showed low data quality scores in terms of overall expression, and (iii) 9 samples due to missing WGS data. The remaining N=185 MK samples had an average of 41.1 million reads per sample with an average alignment rate of 90.79%.

**Platelets:** RNA-sequencing data was collected in 4 batches totaling 307 platelet samples. We removed (i) 4 samples that were low-expression outliers, (ii) 6 samples that were excluded due to poor quality or unexpected familial relationships, and (iii) 7 samples due to missing WGS

data. The remaining N=290 platelet samples had an average of 38.8 million reads per samples with an average alignment rate of 93.18%.

**WGS of MK samples:** After filtering the genotype data to autosomal SNPs with at least two samples per genotype and a call rate of at least 80%, we retained 5,004,400 SNPs in the AA cohort and 4,433,801 in the EA cohort.

**WGS of platelet samples:** After filtering genotype data to only autosomal SNPs with at least two samples per genotype and a call rate of at least 80%, we retained 5,500,942 SNPs in the AA cohort and 5,064,974 in the EA cohort.

### ***Cis*-eQTL analysis**

A detailed overview of the full analysis pipeline is presented in **Figure 1**. eQTL analyses were carried out within a tissue (MKs and platelets) and stratified by ancestry (AAs and EAs) with analysis performed for each gene within a 1Mb window of each SNP using the R package MatrixEQTL<sup>15</sup> (version 2.2). Sex, age, percent CD41<sup>+</sup>CD42a<sup>+</sup> in MK pellets (not included in platelet analysis), RNA-sequencing batch, 15 principal components (PCs) of the filtered and log-transformed gene expression matrix, and ancestry PCs (3 PCs for EAs and 1 PC for AAs) were included as covariates in each linear model fit. To adjust for family relationships among samples, we used a kinship matrix based on known pedigree information to integrate the correlation structure among samples using the *errorCovariance* option within the *Matrix\_eQTL\_main* function. Results from eQTL analyses of AAs and EAs were combined within MKs and platelets, respectively, by meta-analyses using fixed effects models. The meta analyses were carried out with the R package meta<sup>16</sup> (version 4.9-5). We used these meta-analysis

results to identify the most significant eQTL SNP for each gene using eigenMT<sup>17</sup>, yielding a single SNP-gene pair for each gene.

These eQTL results were summarized and reported at two levels, similar to the 'Single-Tissue cis-eQTL Data' provided by the GTEx Consortium (gtexportal.org): (i) the level of *all* SNP-gene pairs (referred to below as the MatrixEQTL results); and (ii) the level of the *peak* SNP-gene pair (referred to below as the eigenMT results). We used (i) as the input to eigenMT and provide these full results to the community for completeness. The eigenMT results (ii) are the basis for our downstream enrichment analyses as well as comparisons to results from the GTEx portal. For the eigenMT results (*peak* SNP-gene pair), the peak SNP per gene was identified while accounting for linkage disequilibrium between nearby variants, and adjustments were then made for multiple testing using the eigenMT method for each gene separately. Given the set of all peak SNPs per gene and their corresponding eigenMT-adjusted p-values, we calculated false discovery rate (FDR) adjusted q-values<sup>18</sup> from the set of eigenMT-adjusted p-values to perform multiple testing correction across genes. We called a SNP-gene pair an eQTL if the calculated q-value was below 0.05. The genes associated with the significant SNP-gene pairs from the eigenMT analysis are referred to below as eGenes.

There was a small number of eQTLs in each tissue (84 of 946 and 151 out of 1,830 in MKs and platelets, respectively) where the homozygous minor allele was only noted in two individuals. Of these, a few are of note because the two individuals with the rare homozygous variant are in the same family (4 and 41 in MKs and platelets, respectively). Although our methods are robust



to relatedness, we do include a flag in our results files available for download on our website to indicate these special cases.

### **Cross-tissue comparison of eQTL results**

To compare results across tissues, in addition to examining significant SNP-gene pairs that were exactly shared between the tissues, we allowed for flexibility in the specific SNP showing association with a gene across tissues, to encompass similar but not identical regulatory features or to allow for variation in allele frequencies across the samples included in each tissue-specific analysis. We did this by taking each eQTL in one tissue and seeing whether a significant eQTL targeting the same gene was present in the other tissue, within a genomic window of a certain size. We examined window sizes ranging from 5kb to 1Mb in either direction of the SNP of interest with the restriction that the set of potential SNPs in the other tissue was within the range of 1Mb on either side of the gene. We note that we did not use an LD-based approach here due to the complexities of our analysis design: with a meta-analysis across two population groups, followed by selection of only the top eQTL per eGene, we were unable to determine a reasonable way to assess correlation of genotype across the two tissues.

### **Overlap of eQTLs with functional annotation tracks**

To characterize the location of our eigenMT-identified peak SNPs relative to relevant functional annotations, we obtained bed-file tracks of regulatory signatures specific to MKs from the EU Blueprint project (<http://www.blueprint-epigenome.eu>) including DNase hotspot regions,

H3K27 acetylation loci (including those which do or do not overlap with promoter elements), h3k4me3 loci, enhancer elements derived by chromatin segmentation, and MK super-enhancer elements, as defined in Petersen et al.<sup>19</sup>. As controls, we also included two additional tracks: HMEC (Human Mammary Epithelial Cell) super-enhancers and a version of the MK super-enhancer track with the coordinates shuffled. Enrichment of overlap of significant eigenMT results (FDR-corrected p-value < 0.05) compared to all eigenMT results was assessed using Fisher's exact test.

### **Gene-set enrichment and pathway analysis**

Gene-set enrichment analysis was performed to assess for enrichment of biologically relevant gene categories among highly expressed genes in MKs, relative to all known genes, using Fisher's exact test as implemented in the topGO package<sup>20</sup> (v2.37.0). topGO takes the hierarchical structure of the ontology into account in assessing significance of enrichment. To increase power, we limited gene sets considered for testing to those with at least three genes in our dataset included in the node of the gene ontology graph, and used the top 10% of expressed genes to define our set of true hits for the Fisher's exact test. The same enrichment analysis was repeated for platelet gene expression.

We also investigated gene-set enrichment analysis in the set of significant eigenMT eQTL hits (eGenes, q-value < 0.05) to address two questions: (1) are the eGenes in MKs and platelets enriched for biologically meaningful pathways; and (2) are the eGenes in MKs and platelets mapping to a relevant annotation track enriched for biologically meaningful pathways. For (1)

we considered eGenes from eigenMT in the MKs/platelets relative to all expressed genes in the MKs/platelets, respectively. Enrichment of gene ontology categories was evaluated with both Fisher's exact test (binary classification of eQTLs) and the Kolmogorov-Smirnov test (to allow for weighting based on strength of eQTL association) using topGO, and enrichment of canonical pathways and immunologic gene sets from the Molecular Signatures Database (MSigDB<sup>21</sup>) was evaluated with Fisher's exact test. In all cases we required at least 10 genes in our dataset to be included among those comprising the ontology node or pathway being tested, to provide adequate power for significance assessment. For (2) we considered significant eGenes from eigenMT in the MKs/platelets that overlapped one of our functional annotation tracks, relative to all significant eGenes from eigenMT in the MKs/platelets, respectively. Here, we evaluated enrichment of gene ontology categories with topGO and pathways from MSigDB<sup>21</sup> using Fisher's exact test, again requiring at least 10 genes in our dataset to be included among those comprising the ontology node or pathway being tested.

### **GWAS catalog overlap**

To assess whether our eQTLs had previously been reported in GWAS of platelet-related traits, we downloaded the full NHGRI-EBI GWAS catalog (v1.0.2) from <https://www.ebi.ac.uk/gwas/docs/file-downloads> and selected any entries where the word "platelet" was included in either the trait or the manuscript title, and which had reported GWAS p-values <  $5 \times 10^{-8}$ . We compared these reported SNPs with our eQTLs and report all exact matches.

The GWAS catalog was examined for the following phenotypes: Cardiometabolic and hematological traits<sup>22</sup>, Mean platelet volume <sup>23-28</sup>, Platelet count <sup>24-26,29-34</sup>, Platelet distribution width <sup>24</sup>, Platelet-derived growth factor BB levels <sup>35</sup>, Plateletcrit <sup>24</sup>. SNPs within the catalog were limited to those with  $p < 5 \times 10^{-8}$ , and all eGenes for this full set of curated variants are listed in this table. Note: 1065 variants were looked up, and 24 variants had a significant eGene in one or both tissues.

### **Data sharing resources**

WGS variant calls are available for all samples through the Database of Genotypes and Phenotypes (dbGaP) under accession number phs001218.v2.p1.

RNA-seq data (raw reads) are available through application and approval from the GeneSTAR Study Steering Committee:

[https://www.hopkinsmedicine.org/gim/research/GeneSTAR/for\\_researchers](https://www.hopkinsmedicine.org/gim/research/GeneSTAR/for_researchers)

eQTL analysis results are hosted on a website at:

<http://www.biostat.jhsph.edu/~kkammers/GeneSTAR/>.

Code for analyses is available from the authors upon request.

## **Supplementary Results**

### **Comparison of MK expression to published data**

Given that we are working with iPSC-derived rather than primary MK cells, we sought to confirm whether our results corresponded to previously published data on MK gene expression. The Bloodomics Consortium described gene expression using microarrays in CD34+ derived MKs from 4 cord blood samples as part of the HaemAtlas project of human differentiated blood cells <sup>36</sup>. The numbers of genes expressed in derived MKs was similar between our study (N=9,808) and the Bloodomics study (10,444 probe sets mapping to 9,089 unique genes, their Table S3), but of these, there were only 6,867 genes with matching annotated gene names. 6,017 of these 6,867 genes (87.7%) were expressed in common in the two studies. Given the extremely small number of samples in the Bloodomics study, we consider this to be good concordance.

### **Comparison of platelet expression to published data**

We also compared the expressed genes and their expression levels in platelets with previously published data sets <sup>13,37</sup>. Londin et al. <sup>13</sup> presented an RNA-seq analysis of platelets from 10 individuals. Their Supplementary file 4 contains the gene expression matrix of 5,591 unique genes observed in all 10 samples. 3,674 of the 5,034 genes expressed in our study (73.0%) were expressed their study as well. Across these shared genes, the Spearman's correlation between the mean of the normalized RPKM values from Londin et al. <sup>13</sup> and the mean of the log-transformed FPKM values from our study is 71.6%.

Bray et al.<sup>37</sup> described the gene expression of platelets from four healthy individuals using RNA-Seq. Their Supplementary Table S2A consists of a list of protein-coding transcripts and their normalized expression levels for each of the four total RNA samples. Similar to Bray et al., we selected the most abundant isoform for each gene to represent the gene. The number of expressed genes for the four samples varied between 5,511 and 10,860. Comparing the 5,034 expressed genes in our study to each of the four individual expression profiles in Bray's study, we found that between 3,105 and 4,305 genes (61.7% and 85.5%) were in common. For these shared genes, the Spearman correlation between the expression in each of the four samples and the average expression for each gene in our study ranged from 55.8% to 66.2% (all p-values  $< 2.2 \times 10^{-16}$ ). Considering the small sample sizes of these studies, we consider this to be good overlap.

Finally, comparing the 5,034 expressed genes in our study to the starting set of 5,695 expressed genes in Simon et al. 2016 eQTL study<sup>38</sup> we found that 3,292 (65.5%) genes were in common. For these genes expressed in common, the Spearman correlation between the average gene expression in Simon's study and our study (data obtained from Simon et al. 2014, Table S2A,<sup>39</sup>) is 62% (p-value  $< 2.2 \times 10^{-16}$ ), similar to what we see above.

## Supplementary Tables

**Supplementary Table S1:** Sample demographics

**Supplementary Tables S2A and S2B:** Significant gene ontology categories for expressed genes in MKs (S2A) and platelets (S2B)

**Supplementary Table S3:** eQTLs significant in both Platelets and MKs

**Supplementary Table S4:** Full results from GWAS catalog lookup of significant eQTL results

**Web-based results tables:** Searchable interactive tables and downloadable .csv files for four sets of eQTL results are available at <http://www.biostat.jhsph.edu/~kkammers/GeneSTAR/> including full MatrixEQTL and eigenMT results for MKs and platelets.

Supplementary Table S1: Sample demographics

|                                | MKs          |              | Platelets    |            |
|--------------------------------|--------------|--------------|--------------|------------|
|                                | AA           | EA           | AA           | EA         |
| <b>Sample size</b>             | 84           | 101          | 110          | 180        |
| <b>Female sex: N (%)</b>       | 52 (61.90)   | 47 (46.53)   | 74 (67.27)   | 95 (52.78) |
| <b>Age in years: Mean (SD)</b> | 50.2 (12.7)  | 54.41 (13.6) | 53.88 (11.9) | 51.97 (11) |
| <b>CD 41/42 %: Mean (SD)</b>   | 62.81 (15.8) | 60.54 (15.7) | --           | --         |



Supplementary Table S2A: Significant gene ontology categories for expressed genes in MKs

| GO.ID      | Term                                                                | Annotated | Significant | Expected | pval     | qval     |
|------------|---------------------------------------------------------------------|-----------|-------------|----------|----------|----------|
| GO:0045047 | protein targeting to ER                                             | 97        | 80          | 5.52     | 1.00E-30 | 1.69E-28 |
| GO:0006413 | translational initiation                                            | 170       | 102         | 9.68     | 1.00E-30 | 1.69E-28 |
| GO:0006614 | SRP-dependent cotranslational protein targeting to membrane         | 92        | 77          | 5.24     | 1.00E-30 | 1.69E-28 |
| GO:0006613 | cotranslational protein targeting to membrane                       | 95        | 78          | 5.41     | 1.00E-30 | 1.69E-28 |
| GO:0072599 | establishment of protein localization to endoplasmic reticulum      | 101       | 80          | 5.75     | 1.00E-30 | 1.69E-28 |
| GO:0070972 | protein localization to endoplasmic reticulum                       | 117       | 84          | 6.66     | 1.00E-30 | 1.69E-28 |
| GO:0044403 | symbiont process                                                    | 831       | 204         | 47.31    | 1.00E-30 | 1.69E-28 |
| GO:0016032 | viral process                                                       | 772       | 195         | 43.95    | 1.00E-30 | 1.69E-28 |
| GO:0044419 | interspecies interaction between organisms                          | 873       | 207         | 49.7     | 1.00E-30 | 1.69E-28 |
| GO:0000184 | nuclear-transcribed mRNA catabolic process, nonsense-mediated decay | 110       | 77          | 6.26     | 1.00E-30 | 1.69E-28 |
| GO:0019080 | viral gene expression                                               | 182       | 94          | 10.36    | 1.00E-30 | 1.69E-28 |
| GO:0072594 | establishment of protein localization to organelle                  | 423       | 132         | 24.08    | 1.00E-30 | 1.69E-28 |
| GO:0006612 | protein targeting to membrane                                       | 151       | 82          | 8.6      | 1.00E-30 | 1.69E-28 |
| GO:0006402 | mRNA catabolic process                                              | 318       | 114         | 18.1     | 1.00E-30 | 1.69E-28 |
| GO:0019083 | viral transcription                                                 | 169       | 85          | 9.62     | 1.00E-30 | 1.69E-28 |
| GO:0006401 | RNA catabolic process                                               | 346       | 115         | 19.7     | 1.00E-30 | 1.69E-28 |
| GO:0006605 | protein targeting                                                   | 337       | 111         | 19.19    | 1.00E-30 | 1.69E-28 |
| GO:0006810 | transport                                                           | 4395      | 465         | 250.21   | 1.00E-30 | 1.69E-28 |
| GO:0051234 | establishment of localization                                       | 4501      | 471         | 256.25   | 1.00E-30 | 1.69E-28 |
| GO:0000956 | nuclear-transcribed mRNA catabolic process                          | 181       | 82          | 10.3     | 1.00E-30 | 1.69E-28 |
| GO:0090150 | establishment of protein localization to membrane                   | 262       | 97          | 14.92    | 1.00E-30 | 1.69E-28 |
| GO:0033365 | protein localization to organelle                                   | 742       | 162         | 42.24    | 1.00E-30 | 1.69E-28 |
| GO:0016071 | mRNA metabolic process                                              | 732       | 160         | 41.67    | 1.00E-30 | 1.69E-28 |
| GO:0046907 | intracellular transport                                             | 1421      | 229         | 80.9     | 1.00E-30 | 1.69E-28 |
| GO:0006886 | intracellular protein transport                                     | 778       | 162         | 44.29    | 1.00E-30 | 1.69E-28 |
| GO:0006518 | peptide metabolic process                                           | 755       | 159         | 42.98    | 1.00E-30 | 1.69E-28 |
| GO:0006412 | translation                                                         | 624       | 142         | 35.53    | 1.00E-30 | 1.69E-28 |
| GO:0070727 | cellular macromolecule localization                                 | 1449      | 226         | 82.49    | 1.00E-30 | 1.69E-28 |
| GO:0034613 | cellular protein localization                                       | 1442      | 225         | 82.1     | 1.00E-30 | 1.69E-28 |
| GO:0043043 | peptide biosynthetic process                                        | 647       | 143         | 36.83    | 1.00E-30 | 1.69E-28 |
| GO:0051641 | cellular localization                                               | 2356      | 300         | 134.13   | 1.00E-30 | 1.69E-28 |
| GO:0034655 | nucleobase-containing compound catabolic process                    | 562       | 131         | 32       | 1.00E-30 | 1.69E-28 |
| GO:0051649 | establishment of localization in cell                               | 1773      | 249         | 100.94   | 1.00E-30 | 1.69E-28 |
| GO:0051179 | localization                                                        | 5680      | 525         | 323.37   | 1.00E-30 | 1.69E-28 |
| GO:0044270 | cellular nitrogen compound catabolic process                        | 604       | 134         | 34.39    | 1.00E-30 | 1.69E-28 |
| GO:0045055 | regulated exocytosis                                                | 724       | 146         | 41.22    | 1.00E-30 | 1.69E-28 |
| GO:0044265 | cellular macromolecule catabolic process                            | 931       | 168         | 53       | 1.00E-30 | 1.69E-28 |
| GO:0046700 | heterocycle catabolic process                                       | 603       | 132         | 34.33    | 1.00E-30 | 1.69E-28 |
| GO:0019439 | aromatic compound catabolic process                                 | 615       | 133         | 35.01    | 1.00E-30 | 1.69E-28 |
| GO:0043604 | amide biosynthetic process                                          | 767       | 150         | 43.67    | 1.00E-30 | 1.69E-28 |
| GO:1901361 | organic cyclic compound catabolic process                           | 644       | 135         | 36.66    | 1.00E-30 | 1.69E-28 |
| GO:0043603 | cellular amide metabolic process                                    | 975       | 170         | 55.51    | 1.00E-30 | 1.69E-28 |
| GO:0072657 | protein localization to membrane                                    | 511       | 119         | 29.09    | 1.00E-30 | 1.69E-28 |
| GO:0045184 | establishment of protein localization                               | 1691      | 235         | 96.27    | 1.00E-30 | 1.69E-28 |
| GO:0009057 | macromolecule catabolic process                                     | 1136      | 184         | 64.67    | 1.00E-30 | 1.69E-28 |
| GO:0006887 | exocytosis                                                          | 809       | 150         | 46.06    | 1.00E-30 | 1.69E-28 |
| GO:0008104 | protein localization                                                | 2265      | 279         | 128.95   | 1.00E-30 | 1.69E-28 |
| GO:0033036 | macromolecule localization                                          | 2563      | 299         | 145.92   | 1.00E-30 | 1.69E-28 |
| GO:0015031 | protein transport                                                   | 1589      | 219         | 90.46    | 1.00E-30 | 1.69E-28 |
| GO:0015833 | peptide transport                                                   | 1620      | 221         | 92.23    | 1.00E-30 | 1.69E-28 |
| GO:0051704 | multi-organism process                                              | 2290      | 275         | 130.37   | 1.00E-30 | 1.69E-28 |
| GO:0042886 | amide transport                                                     | 1649      | 223         | 93.88    | 1.00E-30 | 1.69E-28 |
| GO:0043312 | neutrophil degranulation                                            | 461       | 106         | 26.25    | 1.00E-30 | 1.69E-28 |
| GO:0044248 | cellular catabolic process                                          | 1926      | 245         | 109.65   | 1.00E-30 | 1.69E-28 |
| GO:0002283 | neutrophil activation involved in immune response                   | 464       | 106         | 26.42    | 1.00E-30 | 1.69E-28 |
| GO:0002446 | neutrophil mediated immunity                                        | 475       | 107         | 27.04    | 1.00E-30 | 1.69E-28 |
| GO:0042119 | neutrophil activation                                               | 475       | 107         | 27.04    | 1.00E-30 | 1.69E-28 |
| GO:0036230 | granulocyte activation                                              | 482       | 107         | 27.44    | 1.00E-30 | 1.69E-28 |
| GO:0043299 | leukocyte degranulation                                             | 505       | 109         | 28.75    | 1.00E-30 | 1.69E-28 |
| GO:0071705 | nitrogen compound transport                                         | 1907      | 240         | 108.57   | 1.00E-30 | 1.69E-28 |
| GO:0016192 | vesicle-mediated transport                                          | 1728      | 225         | 98.38    | 1.00E-30 | 1.69E-28 |
| GO:0002444 | myeloid leukocyte mediated immunity                                 | 522       | 109         | 29.72    | 1.00E-30 | 1.69E-28 |
| GO:0009056 | catabolic process                                                   | 2172      | 258         | 123.66   | 1.00E-30 | 1.69E-28 |
| GO:0002275 | myeloid cell activation involved in immune response                 | 515       | 108         | 29.32    | 1.00E-30 | 1.69E-28 |
| GO:0002274 | myeloid leukocyte activation                                        | 618       | 116         | 35.18    | 1.00E-30 | 1.69E-28 |
| GO:0001775 | cell activation                                                     | 1268      | 177         | 72.19    | 1.20E-30 | 1.99E-28 |
| GO:0071702 | organic substance transport                                         | 2270      | 258         | 129.23   | 1.80E-30 | 2.94E-28 |
| GO:0002263 | cell activation involved in immune response                         | 651       | 116         | 37.06    | 3.70E-29 | 5.96E-27 |
| GO:1901575 | organic substance catabolic process                                 | 1800      | 218         | 102.48   | 4.70E-29 | 7.46E-27 |
| GO:0002366 | leukocyte activation involved in immune response                    | 648       | 115         | 36.89    | 9.50E-29 | 1.49E-26 |
| GO:1901566 | organonitrogen compound biosynthetic process                        | 1668      | 204         | 94.96    | 1.40E-27 | 2.16E-25 |
| GO:0002443 | leukocyte mediated immunity                                         | 713       | 119         | 40.59    | 3.10E-27 | 4.72E-25 |
| GO:0043933 | protein-containing complex subunit organization                     | 1858      | 214         | 105.78   | 1.80E-25 | 2.70E-23 |
| GO:1901564 | organonitrogen compound metabolic process                           | 5942      | 488         | 338.29   | 2.00E-25 | 2.96E-23 |
| GO:0044267 | cellular protein metabolic process                                  | 4512      | 396         | 256.87   | 2.30E-24 | 3.36E-22 |
| GO:0002181 | cytoplasmic translation                                             | 65        | 33          | 3.7      | 3.00E-24 | 4.33E-22 |
| GO:0032940 | secretion by cell                                                   | 1368      | 171         | 77.88    | 6.30E-24 | 8.97E-22 |
| GO:0071840 | cellular component organization or biogenesis                       | 5415      | 449         | 308.28   | 2.80E-23 | 3.93E-21 |
| GO:0002252 | immune effector process                                             | 1076      | 144         | 61.26    | 6.70E-23 | 9.29E-21 |
| GO:0065003 | protein-containing complex assembly                                 | 1579      | 184         | 89.89    | 3.10E-22 | 4.25E-20 |

Supplementary Table S2A: Significant gene ontology categories for expressed genes in MKs

| GO.ID      | Term                                                                                            | Annotated | Significant | Expected | pval     | qval     |
|------------|-------------------------------------------------------------------------------------------------|-----------|-------------|----------|----------|----------|
| GO:0002376 | immune system process                                                                           | 2684      | 266         | 152.8    | 4.50E-22 | 6.09E-20 |
| GO:0046903 | secretion                                                                                       | 1493      | 176         | 85       | 8.90E-22 | 1.19E-19 |
| GO:0045321 | leukocyte activation                                                                            | 1122      | 145         | 63.88    | 1.40E-21 | 1.85E-19 |
| GO:0044085 | cellular component biogenesis                                                                   | 2682      | 264         | 152.69   | 1.90E-21 | 2.48E-19 |
| GO:0065008 | regulation of biological quality                                                                | 3417      | 314         | 194.53   | 3.20E-21 | 4.13E-19 |
| GO:0019538 | protein metabolic process                                                                       | 5028      | 417         | 286.25   | 6.60E-21 | 8.41E-19 |
| GO:0034622 | cellular protein-containing complex assembly                                                    | 826       | 115         | 47.03    | 1.20E-19 | 1.49E-17 |
| GO:0006955 | immune response                                                                                 | 1823      | 196         | 103.79   | 1.20E-19 | 1.49E-17 |
| GO:0070887 | cellular response to chemical stimulus                                                          | 2925      | 275         | 166.52   | 1.60E-19 | 1.97E-17 |
| GO:0010033 | response to organic substance                                                                   | 2960      | 277         | 168.52   | 2.10E-19 | 2.56E-17 |
| GO:0016043 | cellular component organization                                                                 | 5288      | 427         | 301.05   | 3.20E-19 | 3.85E-17 |
| GO:0009892 | negative regulation of metabolic process                                                        | 3025      | 278         | 172.22   | 2.40E-18 | 2.86E-16 |
| GO:0010605 | negative regulation of macromolecule metabolic process                                          | 2811      | 263         | 160.03   | 2.90E-18 | 3.42E-16 |
| GO:0009058 | biosynthetic process                                                                            | 5480      | 435         | 311.98   | 3.20E-18 | 3.73E-16 |
| GO:0019884 | antigen processing and presentation of exogenous antigen                                        | 169       | 44          | 9.62     | 5.80E-18 | 6.69E-16 |
| GO:0006119 | oxidative phosphorylation                                                                       | 90        | 32          | 5.12     | 8.80E-18 | 1.00E-15 |
| GO:1901576 | organic substance biosynthetic process                                                          | 5409      | 428         | 307.94   | 1.60E-17 | 1.81E-15 |
| GO:0048519 | negative regulation of biological process                                                       | 5075      | 407         | 288.93   | 2.20E-17 | 2.44E-15 |
| GO:0002478 | antigen processing and presentation of exogenous peptide antigen                                | 167       | 43          | 9.51     | 2.20E-17 | 2.44E-15 |
| GO:0002576 | platelet degranulation                                                                          | 118       | 36          | 6.72     | 2.40E-17 | 2.63E-15 |
| GO:0034641 | cellular nitrogen compound metabolic process                                                    | 6042      | 464         | 343.98   | 5.40E-17 | 5.86E-15 |
| GO:0044237 | cellular metabolic process                                                                      | 9600      | 663         | 546.54   | 5.80E-17 | 6.23E-15 |
| GO:0022607 | cellular component assembly                                                                     | 2516      | 238         | 143.24   | 6.60E-17 | 7.02E-15 |
| GO:0006996 | organelle organization                                                                          | 3069      | 276         | 174.72   | 6.70E-17 | 7.06E-15 |
| GO:0044271 | cellular nitrogen compound biosynthetic process                                                 | 4361      | 360         | 248.28   | 8.90E-17 | 9.29E-15 |
| GO:0006457 | protein folding                                                                                 | 167       | 42          | 9.51     | 1.30E-16 | 1.34E-14 |
| GO:0042590 | antigen processing and presentation of exogenous peptide antigen via MHC class I                | 75        | 28          | 4.27     | 2.30E-16 | 2.36E-14 |
| GO:0019882 | antigen processing and presentation                                                             | 210       | 47          | 11.96    | 2.80E-16 | 2.84E-14 |
| GO:0042775 | mitochondrial ATP synthesis coupled electron transport                                          | 70        | 27          | 3.99     | 3.00E-16 | 3.02E-14 |
| GO:0022613 | ribonucleoprotein complex biogenesis                                                            | 316       | 59          | 17.99    | 3.50E-16 | 3.49E-14 |
| GO:0042221 | response to chemical                                                                            | 4227      | 349         | 240.65   | 3.90E-16 | 3.85E-14 |
| GO:0048002 | antigen processing and presentation of peptide antigen                                          | 180       | 43          | 10.25    | 4.30E-16 | 4.21E-14 |
| GO:0042773 | ATP synthesis coupled electron transport                                                        | 71        | 27          | 4.04     | 4.50E-16 | 4.36E-14 |
| GO:0002479 | antigen processing and presentation of exogenous peptide antigen via MHC class I, TAP-dependent | 72        | 27          | 4.1      | 6.80E-16 | 6.54E-14 |
| GO:0007599 | hemostasis                                                                                      | 321       | 59          | 18.28    | 7.40E-16 | 7.05E-14 |
| GO:0031145 | anaphase-promoting complex-dependent catabolic process                                          | 79        | 28          | 4.5      | 1.10E-15 | 1.04E-13 |
| GO:0007596 | blood coagulation                                                                               | 317       | 58          | 18.05    | 1.60E-15 | 1.50E-13 |
| GO:0044249 | cellular biosynthetic process                                                                   | 5342      | 415         | 304.13   | 2.60E-15 | 2.41E-13 |
| GO:0009611 | response to wounding                                                                            | 630       | 88          | 35.87    | 2.80E-15 | 2.58E-13 |
| GO:0050817 | coagulation                                                                                     | 322       | 58          | 18.33    | 3.40E-15 | 3.11E-13 |
| GO:0006950 | response to stress                                                                              | 3494      | 298         | 198.92   | 3.50E-15 | 3.17E-13 |
| GO:0071310 | cellular response to organic substance                                                          | 2428      | 226         | 138.23   | 3.60E-15 | 3.23E-13 |
| GO:0002474 | antigen processing and presentation of peptide antigen via MHC class I                          | 91        | 29          | 5.18     | 8.50E-15 | 7.57E-13 |
| GO:1903311 | regulation of mRNA metabolic process                                                            | 265       | 51          | 15.09    | 1.10E-14 | 9.72E-13 |
| GO:0038093 | Fc receptor signaling pathway                                                                   | 173       | 40          | 9.85     | 1.50E-14 | 1.32E-12 |
| GO:0010389 | regulation of G2/M transition of mitotic cell cycle                                             | 174       | 40          | 9.91     | 1.80E-14 | 1.57E-12 |
| GO:0043488 | regulation of mRNA stability                                                                    | 151       | 37          | 8.6      | 2.10E-14 | 1.81E-12 |
| GO:0030168 | platelet activation                                                                             | 145       | 36          | 8.26     | 3.00E-14 | 2.57E-12 |
| GO:0009059 | macromolecule biosynthetic process                                                              | 4449      | 355         | 253.29   | 3.80E-14 | 3.23E-12 |
| GO:0043487 | regulation of RNA stability                                                                     | 154       | 37          | 8.77     | 4.10E-14 | 3.46E-12 |
| GO:1902749 | regulation of cell cycle G2/M phase transition                                                  | 188       | 41          | 10.7     | 5.80E-14 | 4.85E-12 |
| GO:0033554 | cellular response to stress                                                                     | 1774      | 175         | 101      | 7.40E-14 | 6.14E-12 |
| GO:0042060 | wound healing                                                                                   | 522       | 75          | 29.72    | 8.40E-14 | 6.92E-12 |
| GO:0034645 | cellular macromolecule biosynthetic process                                                     | 4298      | 344         | 244.69   | 8.60E-14 | 7.03E-12 |
| GO:0010629 | negative regulation of gene expression                                                          | 2070      | 196         | 117.85   | 8.90E-14 | 7.22E-12 |
| GO:0022904 | respiratory electron transport chain                                                            | 86        | 27          | 4.9      | 1.10E-13 | 8.86E-12 |
| GO:0061418 | regulation of transcription from RNA polymerase II promoter in response to hypoxia              | 74        | 25          | 4.21     | 1.30E-13 | 1.04E-11 |
| GO:0031647 | regulation of protein stability                                                                 | 250       | 47          | 14.23    | 3.00E-13 | 2.38E-11 |
| GO:0048522 | positive regulation of cellular process                                                         | 4675      | 365         | 266.15   | 3.40E-13 | 2.68E-11 |
| GO:0019222 | regulation of metabolic process                                                                 | 6186      | 456         | 352.18   | 4.00E-13 | 3.13E-11 |
| GO:0006521 | regulation of cellular amino acid metabolic process                                             | 60        | 22          | 3.42     | 5.80E-13 | 4.51E-11 |
| GO:2001233 | regulation of apoptotic signaling pathway                                                       | 373       | 59          | 21.24    | 7.10E-13 | 5.48E-11 |
| GO:0051246 | regulation of protein metabolic process                                                         | 2465      | 220         | 140.34   | 8.30E-13 | 6.36E-11 |
| GO:0009894 | regulation of catabolic process                                                                 | 853       | 101         | 48.56    | 1.10E-12 | 8.37E-11 |
| GO:0061013 | regulation of mRNA catabolic process                                                            | 171       | 37          | 9.74     | 1.30E-12 | 9.83E-11 |
| GO:0031329 | regulation of cellular catabolic process                                                        | 760       | 93          | 43.27    | 1.40E-12 | 1.05E-10 |
| GO:0098869 | cellular oxidant detoxification                                                                 | 88        | 26          | 5.01     | 1.50E-12 | 1.12E-10 |
| GO:0009141 | nucleoside triphosphate metabolic process                                                       | 282       | 49          | 16.05    | 2.00E-12 | 1.46E-10 |
| GO:0000086 | G2/M transition of mitotic cell cycle                                                           | 226       | 43          | 12.87    | 2.00E-12 | 1.46E-10 |
| GO:0043618 | regulation of transcription from RNA polymerase II promoter in response to stress               | 103       | 28          | 5.86     | 2.00E-12 | 1.46E-10 |
| GO:1990748 | cellular detoxification                                                                         | 96        | 27          | 5.47     | 2.10E-12 | 1.52E-10 |
| GO:0034097 | response to cytokine                                                                            | 1104      | 120         | 62.85    | 2.50E-12 | 1.79E-10 |
| GO:0006807 | nitrogen compound metabolic process                                                             | 9077      | 616         | 516.77   | 2.50E-12 | 1.79E-10 |
| GO:0010941 | regulation of cell death                                                                        | 1558      | 154         | 88.7     | 2.90E-12 | 2.06E-10 |
| GO:0009144 | purine nucleoside triphosphate metabolic process                                                | 267       | 47          | 15.2     | 3.50E-12 | 2.47E-10 |
| GO:0030163 | protein catabolic process                                                                       | 739       | 90          | 42.07    | 4.30E-12 | 3.02E-10 |
| GO:0051130 | positive regulation of cellular component organization                                          | 1102      | 119         | 62.74    | 4.80E-12 | 3.35E-10 |
| GO:0009205 | purine ribonucleoside triphosphate metabolic process                                            | 260       | 46          | 14.8     | 5.00E-12 | 3.47E-10 |
| GO:0008219 | cell death                                                                                      | 2061      | 189         | 117.34   | 5.50E-12 | 3.77E-10 |
| GO:0010498 | proteasomal protein catabolic process                                                           | 360       | 56          | 20.5     | 5.50E-12 | 3.77E-10 |

Supplementary Table S2A: Significant gene ontology categories for expressed genes in MKs

| GO.ID      | Term                                                                                 | Annotated | Significant | Expected | pval     | qval     |
|------------|--------------------------------------------------------------------------------------|-----------|-------------|----------|----------|----------|
| GO:0044839 | cell cycle G2/M phase transition                                                     | 242       | 44          | 13.78    | 5.60E-12 | 3.79E-10 |
| GO:0043620 | regulation of DNA-templated transcription in response to stress                      | 107       | 28          | 6.09     | 5.60E-12 | 3.79E-10 |
| GO:0009123 | nucleoside monophosphate metabolic process                                           | 291       | 49          | 16.57    | 6.50E-12 | 4.37E-10 |
| GO:0006915 | apoptotic process                                                                    | 1797      | 170         | 102.31   | 6.80E-12 | 4.54E-10 |
| GO:0048518 | positive regulation of biological process                                            | 5298      | 397         | 301.62   | 7.40E-12 | 4.91E-10 |
| GO:0046034 | ATP metabolic process                                                                | 235       | 43          | 13.38    | 7.90E-12 | 5.22E-10 |
| GO:0032268 | regulation of cellular protein metabolic process                                     | 2287      | 204         | 130.2    | 8.20E-12 | 5.38E-10 |
| GO:0009199 | ribonucleoside triphosphate metabolic process                                        | 264       | 46          | 15.03    | 8.60E-12 | 5.61E-10 |
| GO:1901360 | organic cyclic compound metabolic process                                            | 5787      | 426         | 329.46   | 8.90E-12 | 5.77E-10 |
| GO:0043067 | regulation of programmed cell death                                                  | 1445      | 144         | 82.27    | 9.30E-12 | 6.00E-10 |
| GO:0044772 | mitotic cell cycle phase transition                                                  | 539       | 72          | 30.69    | 9.70E-12 | 6.22E-10 |
| GO:0098754 | detoxification                                                                       | 102       | 27          | 5.81     | 1.00E-11 | 6.37E-10 |
| GO:0050896 | response to stimulus                                                                 | 7976      | 552         | 454.09   | 1.20E-11 | 7.51E-10 |
| GO:0019058 | viral life cycle                                                                     | 306       | 50          | 17.42    | 1.20E-11 | 7.51E-10 |
| GO:0051128 | regulation of cellular component organization                                        | 2181      | 196         | 124.17   | 1.20E-11 | 7.51E-10 |
| GO:0050878 | regulation of body fluid levels                                                      | 475       | 66          | 27.04    | 1.30E-11 | 8.05E-10 |
| GO:0060071 | Wnt signaling pathway, planar cell polarity pathway                                  | 103       | 27          | 5.86     | 1.30E-11 | 8.05E-10 |
| GO:0044238 | primary metabolic process                                                            | 9494      | 635         | 540.51   | 1.40E-11 | 8.62E-10 |
| GO:0044260 | cellular macromolecule metabolic process                                             | 7140      | 504         | 406.49   | 1.50E-11 | 9.18E-10 |
| GO:0045333 | cellular respiration                                                                 | 151       | 33          | 8.6      | 1.60E-11 | 9.74E-10 |
| GO:0033238 | regulation of cellular amine metabolic process                                       | 76        | 23          | 4.33     | 1.70E-11 | 1.03E-09 |
| GO:0070498 | interleukin-1-mediated signaling pathway                                             | 97        | 26          | 5.52     | 1.80E-11 | 1.07E-09 |
| GO:0097190 | apoptotic signaling pathway                                                          | 546       | 72          | 31.08    | 1.80E-11 | 1.07E-09 |
| GO:0043161 | proteasome-mediated ubiquitin-dependent protein catabolic process                    | 309       | 50          | 17.59    | 1.80E-11 | 1.07E-09 |
| GO:0042981 | regulation of apoptotic process                                                      | 1419      | 141         | 80.79    | 2.00E-11 | 1.18E-09 |
| GO:0090175 | regulation of establishment of planar polarity                                       | 105       | 27          | 5.98     | 2.10E-11 | 1.24E-09 |
| GO:0071345 | cellular response to cytokine stimulus                                               | 1027      | 111         | 58.47    | 2.60E-11 | 1.52E-09 |
| GO:0010638 | positive regulation of organelle organization                                        | 553       | 72          | 31.48    | 3.30E-11 | 1.92E-09 |
| GO:0008380 | RNA splicing                                                                         | 378       | 56          | 21.52    | 4.00E-11 | 2.32E-09 |
| GO:0010972 | negative regulation of G2/M transition of mitotic cell cycle                         | 79        | 23          | 4.5      | 4.10E-11 | 2.36E-09 |
| GO:0000375 | RNA splicing, via transesterification reactions                                      | 296       | 48          | 16.85    | 4.20E-11 | 2.41E-09 |
| GO:0012501 | programmed cell death                                                                | 1938      | 177         | 110.33   | 4.50E-11 | 2.56E-09 |
| GO:0006446 | regulation of translational initiation                                               | 66        | 21          | 3.76     | 4.50E-11 | 2.56E-09 |
| GO:0009987 | cellular process                                                                     | 14228     | 864         | 810.02   | 4.70E-11 | 2.66E-09 |
| GO:0055114 | oxidation-reduction process                                                          | 860       | 97          | 48.96    | 5.10E-11 | 2.87E-09 |
| GO:0001736 | establishment of planar polarity                                                     | 117       | 28          | 6.66     | 5.70E-11 | 3.17E-09 |
| GO:0007164 | establishment of tissue polarity                                                     | 117       | 28          | 6.66     | 5.70E-11 | 3.17E-09 |
| GO:2001242 | regulation of intrinsic apoptotic signaling pathway                                  | 150       | 32          | 8.54     | 6.30E-11 | 3.49E-09 |
| GO:0006139 | nucleobase-containing compound metabolic process                                     | 5394      | 398         | 307.09   | 7.10E-11 | 3.91E-09 |
| GO:0022900 | electron transport chain                                                             | 151       | 32          | 8.6      | 7.60E-11 | 4.16E-09 |
| GO:0044770 | cell cycle phase transition                                                          | 576       | 73          | 32.79    | 8.40E-11 | 4.58E-09 |
| GO:0031146 | SCF-dependent proteasomal ubiquitin-dependent protein catabolic process              | 68        | 21          | 3.87     | 8.50E-11 | 4.61E-09 |
| GO:0009167 | purine ribonucleoside monophosphate metabolic process                                | 262       | 44          | 14.92    | 8.60E-11 | 4.64E-09 |
| GO:0000377 | RNA splicing, via transesterification reactions with bulged adenosine as nucleophile | 292       | 47          | 16.62    | 8.80E-11 | 4.70E-09 |
| GO:0000398 | mRNA splicing, via spliceosome                                                       | 292       | 47          | 16.62    | 8.80E-11 | 4.70E-09 |
| GO:0009126 | purine nucleoside monophosphate metabolic process                                    | 263       | 44          | 14.97    | 9.80E-11 | 5.21E-09 |
| GO:0009161 | ribonucleoside monophosphate metabolic process                                       | 273       | 45          | 15.54    | 1.00E-10 | 5.27E-09 |
| GO:1901990 | regulation of mitotic cell cycle phase transition                                    | 409       | 58          | 23.28    | 1.00E-10 | 5.27E-09 |
| GO:1904869 | regulation of protein localization to Cajal body                                     | 8         | 8           | 0.46     | 1.10E-10 | 5.74E-09 |
| GO:1904871 | positive regulation of protein localization to Cajal body                            | 8         | 8           | 0.46     | 1.10E-10 | 5.74E-09 |
| GO:0035722 | interleukin-12-mediated signaling pathway                                            | 45        | 17          | 2.56     | 1.50E-10 | 7.79E-09 |
| GO:0033043 | regulation of organelle organization                                                 | 1071      | 112         | 60.97    | 1.60E-10 | 8.19E-09 |
| GO:0046483 | heterocycle metabolic process                                                        | 5541      | 405         | 315.46   | 1.60E-10 | 8.19E-09 |
| GO:0022618 | ribonucleoprotein complex assembly                                                   | 164       | 33          | 9.34     | 1.60E-10 | 8.19E-09 |
| GO:0006897 | endocytosis                                                                          | 586       | 73          | 33.36    | 1.90E-10 | 9.60E-09 |
| GO:0009636 | response to toxic substance                                                          | 471       | 63          | 26.81    | 1.90E-10 | 9.60E-09 |
| GO:0038095 | Fc-epsilon receptor signaling pathway                                                | 107       | 26          | 6.09     | 1.90E-10 | 9.60E-09 |
| GO:0001738 | morphogenesis of a polarized epithelium                                              | 131       | 29          | 7.46     | 2.00E-10 | 1.00E-08 |
| GO:0044257 | cellular protein catabolic process                                                   | 599       | 74          | 34.1     | 2.00E-10 | 1.00E-08 |
| GO:0006120 | mitochondrial electron transport, NADH to ubiquinone                                 | 46        | 17          | 2.62     | 2.20E-10 | 1.09E-08 |
| GO:0050821 | protein stabilization                                                                | 157       | 32          | 8.94     | 2.20E-10 | 1.09E-08 |
| GO:0098657 | import into cell                                                                     | 660       | 79          | 37.57    | 2.20E-10 | 1.09E-08 |
| GO:1903047 | mitotic cell cycle process                                                           | 771       | 88          | 43.89    | 2.40E-10 | 1.18E-08 |
| GO:0071826 | ribonucleoprotein complex subunit organization                                       | 176       | 34          | 10.02    | 2.70E-10 | 1.32E-08 |
| GO:0001732 | formation of cytoplasmic translation initiation complex                              | 14        | 10          | 0.8      | 2.80E-10 | 1.36E-08 |
| GO:1904874 | positive regulation of telomerase RNA localization to Cajal body                     | 14        | 10          | 0.8      | 2.80E-10 | 1.36E-08 |
| GO:0006725 | cellular aromatic compound metabolic process                                         | 5583      | 406         | 317.85   | 3.20E-10 | 1.54E-08 |
| GO:0071349 | cellular response to interleukin-12                                                  | 47        | 17          | 2.68     | 3.20E-10 | 1.54E-08 |
| GO:0080134 | regulation of response to stress                                                     | 1425      | 137         | 81.13    | 3.90E-10 | 1.87E-08 |
| GO:0008152 | metabolic process                                                                    | 10627     | 688         | 605.01   | 4.40E-10 | 2.10E-08 |
| GO:1902750 | negative regulation of cell cycle G2/M phase transition                              | 88        | 23          | 5.01     | 4.50E-10 | 2.13E-08 |
| GO:0070671 | response to interleukin-12                                                           | 48        | 17          | 2.73     | 4.80E-10 | 2.26E-08 |
| GO:0048523 | negative regulation of cellular process                                              | 4237      | 323         | 241.22   | 4.80E-10 | 2.26E-08 |
| GO:0034109 | homotypic cell-cell adhesion                                                         | 74        | 21          | 4.21     | 4.90E-10 | 2.29E-08 |
| GO:1901987 | regulation of cell cycle phase transition                                            | 438       | 59          | 24.94    | 5.60E-10 | 2.61E-08 |
| GO:0060255 | regulation of macromolecule metabolic process                                        | 5723      | 413         | 325.82   | 5.70E-10 | 2.65E-08 |
| GO:0015980 | energy derivation by oxidation of organic compounds                                  | 228       | 39          | 12.98    | 5.90E-10 | 2.73E-08 |
| GO:0050790 | regulation of catalytic activity                                                     | 1987      | 176         | 113.12   | 6.10E-10 | 2.81E-08 |
| GO:0007049 | cell cycle                                                                           | 1604      | 149         | 91.32    | 6.80E-10 | 3.12E-08 |
| GO:1902600 | proton transmembrane transport                                                       | 113       | 26          | 6.43     | 6.90E-10 | 3.15E-08 |

Supplementary Table S2A: Significant gene ontology categories for expressed genes in MKs

| GO.ID      | Term                                                                        | Annotated | Significant | Expected | pval     | qval     |
|------------|-----------------------------------------------------------------------------|-----------|-------------|----------|----------|----------|
| GO:0009628 | response to abiotic stimulus                                                | 1114      | 113         | 63.42    | 8.10E-10 | 3.68E-08 |
| GO:0071453 | cellular response to oxygen levels                                          | 221       | 38          | 12.58    | 8.40E-10 | 3.80E-08 |
| GO:0070527 | platelet aggregation                                                        | 56        | 18          | 3.19     | 9.10E-10 | 4.10E-08 |
| GO:1903405 | protein localization to nuclear body                                        | 9         | 8           | 0.51     | 9.20E-10 | 4.10E-08 |
| GO:1904851 | positive regulation of establishment of protein localization to telomere    | 9         | 8           | 0.51     | 9.20E-10 | 4.10E-08 |
| GO:1904867 | protein localization to Cajal body                                          | 9         | 8           | 0.51     | 9.20E-10 | 4.10E-08 |
| GO:0007005 | mitochondrion organization                                                  | 399       | 55          | 22.72    | 9.30E-10 | 4.13E-08 |
| GO:0035567 | non-canonical Wnt signaling pathway                                         | 141       | 29          | 8.03     | 1.20E-09 | 5.30E-08 |
| GO:0038061 | NIK/NF-kappaB signaling                                                     | 168       | 32          | 9.56     | 1.30E-09 | 5.72E-08 |
| GO:0034504 | protein localization to nucleus                                             | 215       | 37          | 12.24    | 1.40E-09 | 6.14E-08 |
| GO:0036294 | cellular response to decreased oxygen levels                                | 206       | 36          | 11.73    | 1.50E-09 | 6.55E-08 |
| GO:0060548 | negative regulation of cell death                                           | 942       | 99          | 53.63    | 1.60E-09 | 6.93E-08 |
| GO:0071456 | cellular response to hypoxia                                                | 197       | 35          | 11.22    | 1.60E-09 | 6.93E-08 |
| GO:0050789 | regulation of biological process                                            | 10213     | 663         | 581.44   | 1.90E-09 | 8.17E-08 |
| GO:0044106 | cellular amine metabolic process                                            | 110       | 25          | 6.26     | 1.90E-09 | 8.17E-08 |
| GO:0070482 | response to oxygen levels                                                   | 363       | 51          | 20.67    | 2.00E-09 | 8.56E-08 |
| GO:0097435 | supramolecular fiber organization                                           | 512       | 64          | 29.15    | 2.30E-09 | 9.81E-08 |
| GO:0006091 | generation of precursor metabolites and energy                              | 432       | 57          | 24.59    | 2.40E-09 | 1.02E-07 |
| GO:0022402 | cell cycle process                                                          | 1190      | 117         | 67.75    | 2.50E-09 | 1.05E-07 |
| GO:0006695 | cholesterol biosynthetic process                                            | 66        | 19          | 3.76     | 2.50E-09 | 1.05E-07 |
| GO:1902653 | secondary alcohol biosynthetic process                                      | 66        | 19          | 3.76     | 2.50E-09 | 1.05E-07 |
| GO:0070555 | response to interleukin-1                                                   | 173       | 32          | 9.85     | 2.90E-09 | 1.21E-07 |
| GO:0050792 | regulation of viral process                                                 | 192       | 34          | 10.93    | 3.00E-09 | 1.25E-07 |
| GO:0016579 | protein deubiquitination                                                    | 232       | 38          | 13.23    | 3.50E-09 | 1.45E-07 |
| GO:0051716 | cellular response to stimulus                                               | 6378      | 447         | 363.11   | 4.10E-09 | 1.69E-07 |
| GO:0010564 | regulation of cell cycle process                                            | 715       | 80          | 40.71    | 4.10E-09 | 1.69E-07 |
| GO:0070203 | regulation of establishment of protein localization to telomere             | 10        | 8           | 0.57     | 4.40E-09 | 1.79E-07 |
| GO:1904816 | positive regulation of protein localization to chromosome, telomeric region | 10        | 8           | 0.57     | 4.40E-09 | 1.79E-07 |
| GO:1990173 | protein localization to nucleoplasm                                         | 10        | 8           | 0.57     | 4.40E-09 | 1.79E-07 |
| GO:1904872 | regulation of telomerase RNA localization to Cajal body                     | 17        | 10          | 0.97     | 4.60E-09 | 1.87E-07 |
| GO:0070646 | protein modification by small protein removal                               | 245       | 39          | 13.95    | 4.90E-09 | 1.98E-07 |
| GO:0002183 | cytoplasmic translational initiation                                        | 26        | 12          | 1.48     | 5.00E-09 | 2.01E-07 |
| GO:0042254 | ribosome biogenesis                                                         | 177       | 32          | 10.08    | 5.10E-09 | 2.05E-07 |
| GO:0006753 | nucleoside phosphate metabolic process                                      | 583       | 69          | 33.19    | 5.30E-09 | 2.12E-07 |
| GO:0048524 | positive regulation of viral process                                        | 99        | 23          | 5.64     | 5.50E-09 | 2.19E-07 |
| GO:0016126 | sterol biosynthetic process                                                 | 69        | 19          | 3.93     | 5.70E-09 | 2.26E-07 |
| GO:0009967 | positive regulation of signal transduction                                  | 1500      | 138         | 85.4     | 6.20E-09 | 2.44E-07 |
| GO:0051603 | proteolysis involved in cellular protein catabolic process                  | 549       | 66          | 31.26    | 6.20E-09 | 2.44E-07 |
| GO:0009117 | nucleotide metabolic process                                                | 575       | 68          | 32.74    | 7.10E-09 | 2.79E-07 |
| GO:1902036 | regulation of hematopoietic stem cell differentiation                       | 70        | 19          | 3.99     | 7.50E-09 | 2.93E-07 |
| GO:0009308 | amine metabolic process                                                     | 117       | 25          | 6.66     | 7.50E-09 | 2.93E-07 |
| GO:0097193 | intrinsic apoptotic signaling pathway                                       | 259       | 40          | 14.75    | 7.60E-09 | 2.95E-07 |
| GO:0034248 | regulation of cellular amide metabolic process                              | 424       | 55          | 24.14    | 8.50E-09 | 3.29E-07 |
| GO:0061024 | membrane organization                                                       | 664       | 75          | 37.8     | 8.70E-09 | 3.36E-07 |
| GO:0019693 | ribose phosphate metabolic process                                          | 459       | 58          | 26.13    | 8.80E-09 | 3.38E-07 |
| GO:0043903 | regulation of symbiosis, encompassing mutualism through parasitism          | 220       | 36          | 12.52    | 9.20E-09 | 3.53E-07 |
| GO:0090670 | RNA localization to Cajal body                                              | 18        | 10          | 1.02     | 9.80E-09 | 3.70E-07 |
| GO:0090671 | telomerase RNA localization to Cajal body                                   | 18        | 10          | 1.02     | 9.80E-09 | 3.70E-07 |
| GO:0090672 | telomerase RNA localization                                                 | 18        | 10          | 1.02     | 9.80E-09 | 3.70E-07 |
| GO:0090685 | RNA localization to nucleus                                                 | 18        | 10          | 1.02     | 9.80E-09 | 3.70E-07 |
| GO:0007346 | regulation of mitotic cell cycle                                            | 593       | 69          | 33.76    | 1.10E-08 | 4.11E-07 |
| GO:0000278 | mitotic cell cycle                                                          | 885       | 92          | 50.38    | 1.10E-08 | 4.11E-07 |
| GO:0048584 | positive regulation of response to stimulus                                 | 2108      | 179         | 120.01   | 1.10E-08 | 4.11E-07 |
| GO:0097237 | cellular response to toxic substance                                        | 222       | 36          | 12.64    | 1.20E-08 | 4.47E-07 |
| GO:0071897 | DNA biosynthetic process                                                    | 174       | 31          | 9.91     | 1.30E-08 | 4.81E-07 |
| GO:0042592 | homeostatic process                                                         | 1632      | 146         | 92.91    | 1.30E-08 | 4.81E-07 |
| GO:0022411 | cellular component disassembly                                              | 465       | 58          | 26.47    | 1.40E-08 | 5.15E-07 |
| GO:0006364 | rRNA processing                                                             | 138       | 27          | 7.86     | 1.40E-08 | 5.15E-07 |
| GO:0007229 | integrin-mediated signaling pathway                                         | 88        | 21          | 5.01     | 1.50E-08 | 5.48E-07 |
| GO:0070202 | regulation of establishment of protein localization to chromosome           | 11        | 8           | 0.63     | 1.50E-08 | 5.48E-07 |
| GO:0030162 | regulation of proteolysis                                                   | 650       | 73          | 37.01    | 1.80E-08 | 6.55E-07 |
| GO:0002757 | immune response-activating signal transduction                              | 469       | 58          | 26.7     | 1.90E-08 | 6.89E-07 |
| GO:0002682 | regulation of immune system process                                         | 1416      | 130         | 80.61    | 2.10E-08 | 7.60E-07 |
| GO:1901565 | organonitrogen compound catabolic process                                   | 1045      | 103         | 59.49    | 2.20E-08 | 7.93E-07 |
| GO:0006163 | purine nucleotide metabolic process                                         | 460       | 57          | 26.19    | 2.40E-08 | 8.57E-07 |
| GO:0043069 | negative regulation of programmed cell death                                | 860       | 89          | 48.96    | 2.40E-08 | 8.57E-07 |
| GO:0010647 | positive regulation of cell communication                                   | 1633      | 145         | 92.97    | 2.40E-08 | 8.57E-07 |
| GO:0010942 | positive regulation of cell death                                           | 668       | 74          | 38.03    | 2.50E-08 | 8.90E-07 |
| GO:0002223 | stimulatory C-type lectin receptor signaling pathway                        | 107       | 23          | 6.09     | 2.60E-08 | 9.22E-07 |
| GO:0002684 | positive regulation of immune system process                                | 955       | 96          | 54.37    | 2.70E-08 | 9.54E-07 |
| GO:0006796 | phosphate-containing compound metabolic process                             | 2879      | 228         | 163.91   | 2.80E-08 | 9.87E-07 |
| GO:0051726 | regulation of cell cycle                                                    | 1078      | 105         | 61.37    | 3.00E-08 | 1.05E-06 |
| GO:0023056 | positive regulation of signaling                                            | 1639      | 145         | 93.31    | 3.00E-08 | 1.05E-06 |
| GO:0002429 | immune response-activating cell surface receptor signaling pathway          | 315       | 44          | 17.93    | 3.10E-08 | 1.08E-06 |
| GO:0043066 | negative regulation of apoptotic process                                    | 839       | 87          | 47.77    | 3.20E-08 | 1.11E-06 |
| GO:0051248 | negative regulation of protein metabolic process                            | 1039      | 102         | 59.15    | 3.20E-08 | 1.11E-06 |
| GO:0065007 | biological regulation                                                       | 10751     | 685         | 612.07   | 3.30E-08 | 1.14E-06 |
| GO:0006417 | regulation of translation                                                   | 372       | 49          | 21.18    | 3.40E-08 | 1.17E-06 |
| GO:0016072 | rRNA metabolic process                                                      | 172       | 30          | 9.79     | 3.60E-08 | 1.23E-06 |
| GO:0090263 | positive regulation of canonical Wnt signaling pathway                      | 126       | 25          | 7.17     | 3.60E-08 | 1.23E-06 |

Supplementary Table S2A: Significant gene ontology categories for expressed genes in MKs

| GO.ID      | Term                                                                             | Annotated | Significant | Expected | pval     | qval     |
|------------|----------------------------------------------------------------------------------|-----------|-------------|----------|----------|----------|
| GO:0035966 | response to topologically incorrect protein                                      | 163       | 29          | 9.28     | 3.90E-08 | 1.33E-06 |
| GO:0009719 | response to endogenous stimulus                                                  | 1488      | 134         | 84.71    | 3.90E-08 | 1.33E-06 |
| GO:0019941 | modification-dependent protein catabolic process                                 | 479       | 58          | 27.27    | 4.10E-08 | 1.39E-06 |
| GO:0042493 | response to drug                                                                 | 910       | 92          | 51.81    | 4.20E-08 | 1.42E-06 |
| GO:0062012 | regulation of small molecule metabolic process                                   | 409       | 52          | 23.28    | 4.30E-08 | 1.44E-06 |
| GO:0006123 | mitochondrial electron transport, cytochrome c to oxygen                         | 12        | 8           | 0.68     | 4.30E-08 | 1.44E-06 |
| GO:0019646 | aerobic electron transport chain                                                 | 12        | 8           | 0.68     | 4.30E-08 | 1.44E-06 |
| GO:1904814 | regulation of protein localization to chromosome, telomeric region               | 12        | 8           | 0.68     | 4.30E-08 | 1.44E-06 |
| GO:0010948 | negative regulation of cell cycle process                                        | 319       | 44          | 18.16    | 4.50E-08 | 1.49E-06 |
| GO:0009150 | purine ribonucleotide metabolic process                                          | 433       | 54          | 24.65    | 4.50E-08 | 1.49E-06 |
| GO:0002220 | innate immune response activating cell surface receptor signaling pathway        | 110       | 23          | 6.26     | 4.60E-08 | 1.52E-06 |
| GO:0009259 | ribonucleotide metabolic process                                                 | 445       | 55          | 25.33    | 4.60E-08 | 1.52E-06 |
| GO:0036293 | response to decreased oxygen levels                                              | 342       | 46          | 19.47    | 4.80E-08 | 1.57E-06 |
| GO:0044093 | positive regulation of molecular function                                        | 1536      | 137         | 87.45    | 4.80E-08 | 1.57E-06 |
| GO:0044281 | small molecule metabolic process                                                 | 1855      | 159         | 105.61   | 4.90E-08 | 1.59E-06 |
| GO:0043281 | regulation of cysteine-type endopeptidase activity involved in apoptotic process | 184       | 31          | 10.48    | 4.90E-08 | 1.59E-06 |
| GO:0002253 | activation of immune response                                                    | 542       | 63          | 30.86    | 4.90E-08 | 1.59E-06 |
| GO:0006793 | phosphorus metabolic process                                                     | 2901      | 228         | 165.16   | 5.40E-08 | 1.75E-06 |
| GO:0043632 | modification-dependent macromolecule catabolic process                           | 483       | 58          | 27.5     | 5.50E-08 | 1.78E-06 |
| GO:0001666 | response to hypoxia                                                              | 333       | 45          | 18.96    | 5.80E-08 | 1.87E-06 |
| GO:0006909 | phagocytosis                                                                     | 236       | 36          | 13.44    | 5.90E-08 | 1.90E-06 |
| GO:2001243 | negative regulation of intrinsic apoptotic signaling pathway                     | 87        | 20          | 4.95     | 6.50E-08 | 2.08E-06 |
| GO:0043068 | positive regulation of programmed cell death                                     | 621       | 69          | 35.35    | 6.70E-08 | 2.14E-06 |
| GO:0006511 | ubiquitin-dependent protein catabolic process                                    | 474       | 57          | 26.99    | 6.80E-08 | 2.17E-06 |
| GO:0071704 | organic substance metabolic process                                              | 10184     | 653         | 579.79   | 7.10E-08 | 2.26E-06 |
| GO:0071347 | cellular response to interleukin-1                                               | 149       | 27          | 8.48     | 7.60E-08 | 2.41E-06 |
| GO:2001235 | positive regulation of apoptotic signaling pathway                               | 168       | 29          | 9.56     | 7.70E-08 | 2.43E-06 |
| GO:0019221 | cytokine-mediated signaling pathway                                              | 726       | 77          | 41.33    | 8.10E-08 | 2.55E-06 |
| GO:2001234 | negative regulation of apoptotic signaling pathway                               | 209       | 33          | 11.9     | 9.10E-08 | 2.86E-06 |
| GO:1901700 | response to oxygen-containing compound                                           | 1481      | 132         | 84.32    | 9.30E-08 | 2.91E-06 |
| GO:0043065 | positive regulation of apoptotic process                                         | 614       | 68          | 34.96    | 9.50E-08 | 2.97E-06 |
| GO:0002764 | immune response-regulating signaling pathway                                     | 503       | 59          | 28.64    | 9.70E-08 | 3.02E-06 |
| GO:0060218 | hematopoietic stem cell differentiation                                          | 81        | 19          | 4.61     | 9.80E-08 | 3.04E-06 |
| GO:0043484 | regulation of RNA splicing                                                       | 106       | 22          | 6.03     | 1.00E-07 | 3.10E-06 |
| GO:0006508 | proteolysis                                                                      | 1470      | 131         | 83.69    | 1.10E-07 | 3.38E-06 |
| GO:0019081 | viral translation                                                                | 13        | 8           | 0.74     | 1.10E-07 | 3.38E-06 |
| GO:0080135 | regulation of cellular response to stress                                        | 655       | 71          | 37.29    | 1.10E-07 | 3.38E-06 |
| GO:0006986 | response to unfolded protein                                                     | 152       | 27          | 8.65     | 1.20E-07 | 3.63E-06 |
| GO:0010257 | NADH dehydrogenase complex assembly                                              | 52        | 15          | 2.96     | 1.20E-07 | 3.63E-06 |
| GO:0032981 | mitochondrial respiratory chain complex I assembly                               | 52        | 15          | 2.96     | 1.20E-07 | 3.63E-06 |
| GO:0017144 | drug metabolic process                                                           | 707       | 75          | 40.25    | 1.20E-07 | 3.63E-06 |
| GO:0016310 | phosphorylation                                                                  | 2075      | 172         | 118.13   | 1.20E-07 | 3.63E-06 |
| GO:1902905 | positive regulation of supramolecular fiber organization                         | 172       | 29          | 9.79     | 1.30E-07 | 3.91E-06 |
| GO:1905330 | regulation of morphogenesis of an epithelium                                     | 172       | 29          | 9.79     | 1.30E-07 | 3.91E-06 |
| GO:0006259 | DNA metabolic process                                                            | 880       | 88          | 50.1     | 1.40E-07 | 4.19E-06 |
| GO:0051338 | regulation of transferase activity                                               | 854       | 86          | 48.62    | 1.40E-07 | 4.19E-06 |
| GO:1901532 | regulation of hematopoietic progenitor cell differentiation                      | 83        | 19          | 4.73     | 1.50E-07 | 4.47E-06 |
| GO:0007015 | actin filament organization                                                      | 299       | 41          | 17.02    | 1.50E-07 | 4.47E-06 |
| GO:0043902 | positive regulation of multi-organism process                                    | 174       | 29          | 9.91     | 1.70E-07 | 5.02E-06 |
| GO:0008203 | cholesterol metabolic process                                                    | 136       | 25          | 7.74     | 1.70E-07 | 5.02E-06 |
| GO:1901991 | negative regulation of mitotic cell cycle phase transition                       | 225       | 34          | 12.81    | 1.70E-07 | 5.02E-06 |
| GO:0042176 | regulation of protein catabolic process                                          | 323       | 43          | 18.39    | 1.80E-07 | 5.29E-06 |
| GO:0051702 | interaction with symbiont                                                        | 76        | 18          | 4.33     | 1.80E-07 | 5.29E-06 |
| GO:0060341 | regulation of cellular localization                                              | 807       | 82          | 45.94    | 1.90E-07 | 5.57E-06 |
| GO:0042274 | ribosomal small subunit biogenesis                                               | 23        | 10          | 1.31     | 2.00E-07 | 5.83E-06 |
| GO:0030036 | actin cytoskeleton organization                                                  | 526       | 60          | 29.95    | 2.00E-07 | 5.83E-06 |
| GO:0072521 | purine-containing compound metabolic process                                     | 490       | 57          | 27.9     | 2.10E-07 | 6.09E-06 |
| GO:0002768 | immune response-regulating cell surface receptor signaling pathway               | 348       | 45          | 19.81    | 2.10E-07 | 6.09E-06 |
| GO:0031334 | positive regulation of protein complex assembly                                  | 217       | 33          | 12.35    | 2.30E-07 | 6.65E-06 |
| GO:0030029 | actin filament-based process                                                     | 629       | 68          | 35.81    | 2.40E-07 | 6.90E-06 |
| GO:0042743 | hydrogen peroxide metabolic process                                              | 41        | 13          | 2.33     | 2.40E-07 | 6.90E-06 |
| GO:0045786 | negative regulation of cell cycle                                                | 579       | 64          | 32.96    | 2.50E-07 | 7.17E-06 |
| GO:0002218 | activation of innate immune response                                             | 294       | 40          | 16.74    | 2.70E-07 | 7.69E-06 |
| GO:0045930 | negative regulation of mitotic cell cycle                                        | 294       | 40          | 16.74    | 2.70E-07 | 7.69E-06 |
| GO:0055086 | nucleobase-containing small molecule metabolic process                           | 657       | 70          | 37.4     | 2.70E-07 | 7.69E-06 |
| GO:0032269 | negative regulation of cellular protein metabolic process                        | 976       | 94          | 55.57    | 2.90E-07 | 8.23E-06 |
| GO:0050776 | regulation of immune response                                                    | 909       | 89          | 51.75    | 3.00E-07 | 8.47E-06 |
| GO:0051701 | interaction with host                                                            | 199       | 31          | 11.33    | 3.00E-07 | 8.47E-06 |
| GO:1902652 | secondary alcohol metabolic process                                              | 140       | 25          | 7.97     | 3.10E-07 | 8.71E-06 |
| GO:0010565 | regulation of cellular ketone metabolic process                                  | 169       | 28          | 9.62     | 3.10E-07 | 8.71E-06 |
| GO:0051172 | negative regulation of nitrogen compound metabolic process                       | 2105      | 172         | 119.84   | 3.30E-07 | 9.25E-06 |
| GO:0051235 | maintenance of location                                                          | 275       | 38          | 15.66    | 3.50E-07 | 9.78E-06 |
| GO:0006979 | response to oxidative stress                                                     | 413       | 50          | 23.51    | 3.60E-07 | 1.00E-05 |
| GO:0006278 | RNA-dependent DNA biosynthetic process                                           | 64        | 16          | 3.64     | 3.90E-07 | 1.08E-05 |
| GO:0019725 | cellular homeostasis                                                             | 768       | 78          | 43.72    | 4.00E-07 | 1.10E-05 |
| GO:0030097 | hemopoiesis                                                                      | 808       | 81          | 46       | 4.00E-07 | 1.10E-05 |
| GO:0090304 | nucleic acid metabolic process                                                   | 4846      | 344         | 275.89   | 4.00E-07 | 1.10E-05 |
| GO:0050852 | T cell receptor signaling pathway                                                | 162       | 27          | 9.22     | 4.50E-07 | 1.24E-05 |
| GO:0051169 | nuclear transport                                                                | 289       | 39          | 16.45    | 4.60E-07 | 1.26E-05 |
| GO:0043085 | positive regulation of catalytic activity                                        | 1223      | 111         | 69.63    | 4.60E-07 | 1.26E-05 |

Supplementary Table S2A: Significant gene ontology categories for expressed genes in MKs

| GO.ID      | Term                                                                                         | Annotated | Significant | Expected | pval     | qval     |
|------------|----------------------------------------------------------------------------------------------|-----------|-------------|----------|----------|----------|
| GO:0048534 | hematopoietic or lymphoid organ development                                                  | 851       | 84          | 48.45    | 4.70E-07 | 1.28E-05 |
| GO:0006397 | mRNA processing                                                                              | 429       | 51          | 24.42    | 4.80E-07 | 1.31E-05 |
| GO:0070200 | establishment of protein localization to telomere                                            | 15        | 8           | 0.85     | 4.80E-07 | 1.31E-05 |
| GO:0052547 | regulation of peptidase activity                                                             | 370       | 46          | 21.06    | 5.00E-07 | 1.35E-05 |
| GO:0002520 | immune system development                                                                    | 893       | 87          | 50.84    | 5.00E-07 | 1.35E-05 |
| GO:0021762 | substantia nigra development                                                                 | 37        | 12          | 2.11     | 5.30E-07 | 1.43E-05 |
| GO:0065009 | regulation of molecular function                                                             | 2860      | 220         | 162.82   | 5.50E-07 | 1.48E-05 |
| GO:0009060 | aerobic respiration                                                                          | 58        | 15          | 3.3      | 5.70E-07 | 1.53E-05 |
| GO:0051247 | positive regulation of protein metabolic process                                             | 1443      | 126         | 82.15    | 5.80E-07 | 1.55E-05 |
| GO:0050778 | positive regulation of immune response                                                       | 697       | 72          | 39.68    | 6.00E-07 | 1.60E-05 |
| GO:0032984 | protein-containing complex disassembly                                                       | 281       | 38          | 16       | 6.10E-07 | 1.63E-05 |
| GO:0080090 | regulation of primary metabolic process                                                      | 5269      | 368         | 299.97   | 6.70E-07 | 1.78E-05 |
| GO:0043687 | post-translational protein modification                                                      | 339       | 43          | 19.3     | 6.80E-07 | 1.80E-05 |
| GO:0010243 | response to organonitrogen compound                                                          | 886       | 86          | 50.44    | 6.90E-07 | 1.83E-05 |
| GO:0007166 | cell surface receptor signaling pathway                                                      | 2589      | 202         | 147.4    | 7.10E-07 | 1.87E-05 |
| GO:0043254 | regulation of protein complex assembly                                                       | 376       | 46          | 21.41    | 7.80E-07 | 2.05E-05 |
| GO:0016125 | sterol metabolic process                                                                     | 147       | 25          | 8.37     | 8.00E-07 | 2.10E-05 |
| GO:1901988 | negative regulation of cell cycle phase transition                                           | 240       | 34          | 13.66    | 8.10E-07 | 2.12E-05 |
| GO:1903827 | regulation of cellular protein localization                                                  | 474       | 54          | 26.99    | 8.60E-07 | 2.25E-05 |
| GO:0046165 | alcohol biosynthetic process                                                                 | 138       | 24          | 7.86     | 8.70E-07 | 2.27E-05 |
| GO:0072593 | reactive oxygen species metabolic process                                                    | 241       | 34          | 13.72    | 9.00E-07 | 2.34E-05 |
| GO:0052548 | regulation of endopeptidase activity                                                         | 343       | 43          | 19.53    | 9.30E-07 | 2.42E-05 |
| GO:0031323 | regulation of cellular metabolic process                                                     | 5389      | 374         | 306.8    | 1.00E-06 | 2.58E-05 |
| GO:2000116 | regulation of cysteine-type endopeptidase activity                                           | 210       | 31          | 11.96    | 1.00E-06 | 2.58E-05 |
| GO:0030177 | positive regulation of Wnt signaling pathway                                                 | 159       | 26          | 9.05     | 1.10E-06 | 2.82E-05 |
| GO:0031324 | negative regulation of cellular metabolic process                                            | 2250      | 179         | 128.1    | 1.10E-06 | 2.82E-05 |
| GO:0032270 | positive regulation of cellular protein metabolic process                                    | 1359      | 119         | 77.37    | 1.10E-06 | 2.82E-05 |
| GO:0002758 | innate immune response-activating signal transduction                                        | 277       | 37          | 15.77    | 1.20E-06 | 3.06E-05 |
| GO:0045089 | positive regulation of innate immune response                                                | 346       | 43          | 19.7     | 1.20E-06 | 3.06E-05 |
| GO:0043900 | regulation of multi-organism process                                                         | 382       | 46          | 21.75    | 1.20E-06 | 3.06E-05 |
| GO:0019218 | regulation of steroid metabolic process                                                      | 122       | 22          | 6.95     | 1.30E-06 | 3.31E-05 |
| GO:0007004 | telomere maintenance via telomerase                                                          | 62        | 15          | 3.53     | 1.40E-06 | 3.55E-05 |
| GO:0016055 | Wnt signaling pathway                                                                        | 470       | 53          | 26.76    | 1.50E-06 | 3.79E-05 |
| GO:0070199 | establishment of protein localization to chromosome                                          | 22        | 9           | 1.25     | 1.50E-06 | 3.79E-05 |
| GO:0032273 | positive regulation of protein polymerization                                                | 105       | 20          | 5.98     | 1.60E-06 | 4.02E-05 |
| GO:0010592 | positive regulation of lamellipodium assembly                                                | 17        | 8           | 0.97     | 1.60E-06 | 4.02E-05 |
| GO:0198738 | cell-cell signaling by wnt                                                                   | 472       | 53          | 26.87    | 1.70E-06 | 4.24E-05 |
| GO:0035821 | modification of morphology or physiology of other organism                                   | 153       | 25          | 8.71     | 1.70E-06 | 4.24E-05 |
| GO:0045088 | regulation of innate immune response                                                         | 411       | 48          | 23.4     | 1.70E-06 | 4.24E-05 |
| GO:1903706 | regulation of hemopoiesis                                                                    | 448       | 51          | 25.51    | 1.80E-06 | 4.45E-05 |
| GO:0071495 | cellular response to endogenous stimulus                                                     | 1243      | 110         | 70.77    | 1.80E-06 | 4.45E-05 |
| GO:0045540 | regulation of cholesterol biosynthetic process                                               | 48        | 13          | 2.73     | 1.80E-06 | 4.45E-05 |
| GO:0106118 | regulation of sterol biosynthetic process                                                    | 48        | 13          | 2.73     | 1.80E-06 | 4.45E-05 |
| GO:1903902 | positive regulation of viral life cycle                                                      | 56        | 14          | 3.19     | 2.10E-06 | 5.18E-05 |
| GO:0009893 | positive regulation of metabolic process                                                     | 3086      | 231         | 175.69   | 2.20E-06 | 5.37E-05 |
| GO:1900182 | positive regulation of protein localization to nucleus                                       | 72        | 16          | 4.1      | 2.20E-06 | 5.37E-05 |
| GO:0008154 | actin polymerization or depolymerization                                                     | 155       | 25          | 8.82     | 2.20E-06 | 5.37E-05 |
| GO:2000573 | positive regulation of DNA biosynthetic process                                              | 64        | 15          | 3.64     | 2.20E-06 | 5.37E-05 |
| GO:0051817 | modification of morphology or physiology of other organism involved in symbiotic interaction | 107       | 20          | 6.09     | 2.20E-06 | 5.37E-05 |
| GO:1902903 | regulation of supramolecular fiber organization                                              | 285       | 37          | 16.23    | 2.30E-06 | 5.60E-05 |
| GO:0075522 | IRES-dependent viral translational initiation                                                | 9         | 6           | 0.51     | 2.40E-06 | 5.82E-05 |
| GO:0045185 | maintenance of protein location                                                              | 81        | 17          | 4.61     | 2.40E-06 | 5.82E-05 |
| GO:0045862 | positive regulation of proteolysis                                                           | 309       | 39          | 17.59    | 2.50E-06 | 6.03E-05 |
| GO:0006913 | nucleocytoplasmic transport                                                                  | 286       | 37          | 16.28    | 2.50E-06 | 6.03E-05 |
| GO:0033108 | mitochondrial respiratory chain complex assembly                                             | 73        | 16          | 4.16     | 2.60E-06 | 6.26E-05 |
| GO:0006914 | autophagy                                                                                    | 442       | 50          | 25.16    | 2.70E-06 | 6.47E-05 |
| GO:0061919 | process utilizing autophagic mechanism                                                       | 442       | 50          | 25.16    | 2.70E-06 | 6.47E-05 |
| GO:0019079 | viral genome replication                                                                     | 109       | 20          | 6.21     | 3.00E-06 | 7.18E-05 |
| GO:0010821 | regulation of mitochondrion organization                                                     | 168       | 26          | 9.56     | 3.10E-06 | 7.40E-05 |
| GO:0010833 | telomere maintenance via telomere lengthening                                                | 74        | 16          | 4.21     | 3.20E-06 | 7.62E-05 |
| GO:0051170 | import into nucleus                                                                          | 119       | 21          | 6.77     | 3.30E-06 | 7.84E-05 |
| GO:0006898 | receptor-mediated endocytosis                                                                | 233       | 32          | 13.27    | 3.40E-06 | 8.07E-05 |
| GO:1902745 | positive regulation of lamellipodium organization                                            | 24        | 9           | 1.37     | 3.60E-06 | 8.52E-05 |
| GO:0014070 | response to organic cyclic compound                                                          | 841       | 80          | 47.88    | 3.70E-06 | 8.74E-05 |
| GO:0006414 | translational elongation                                                                     | 120       | 21          | 6.83     | 3.80E-06 | 8.96E-05 |
| GO:0050810 | regulation of steroid biosynthetic process                                                   | 93        | 18          | 5.29     | 4.20E-06 | 9.88E-05 |
| GO:0034976 | response to endoplasmic reticulum stress                                                     | 236       | 32          | 13.44    | 4.40E-06 | 1.03E-04 |
| GO:0002433 | immune response-regulating cell surface receptor signaling pathway involved in phagocytosis  | 76        | 16          | 4.33     | 4.60E-06 | 1.07E-04 |
| GO:0038096 | Fc-gamma receptor signaling pathway involved in phagocytosis                                 | 76        | 16          | 4.33     | 4.60E-06 | 1.07E-04 |
| GO:0015669 | gas transport                                                                                | 19        | 8           | 1.08     | 4.60E-06 | 1.07E-04 |
| GO:0030099 | myeloid cell differentiation                                                                 | 389       | 45          | 22.15    | 4.70E-06 | 1.09E-04 |
| GO:0019637 | organophosphate metabolic process                                                            | 985       | 90          | 56.08    | 4.80E-06 | 1.11E-04 |
| GO:0090090 | negative regulation of canonical Wnt signaling pathway                                       | 162       | 25          | 9.22     | 5.00E-06 | 1.16E-04 |
| GO:0023014 | signal transduction by protein phosphorylation                                               | 835       | 79          | 47.54    | 5.30E-06 | 1.22E-04 |
| GO:0042177 | negative regulation of protein catabolic process                                             | 113       | 20          | 6.43     | 5.30E-06 | 1.22E-04 |
| GO:0070198 | protein localization to chromosome, telomeric region                                         | 25        | 9           | 1.42     | 5.40E-06 | 1.24E-04 |
| GO:0010468 | regulation of gene expression                                                                | 4358      | 307         | 248.11   | 5.60E-06 | 1.29E-04 |
| GO:0045861 | negative regulation of proteolysis                                                           | 296       | 37          | 16.85    | 5.70E-06 | 1.31E-04 |
| GO:0008064 | regulation of actin polymerization or depolymerization                                       | 133       | 22          | 7.57     | 5.80E-06 | 1.33E-04 |
| GO:0051129 | negative regulation of cellular component organization                                       | 622       | 63          | 35.41    | 5.90E-06 | 1.35E-04 |

Supplementary Table S2A: Significant gene ontology categories for expressed genes in MKs

| GO.ID      | Term                                                                                      | Annotated | Significant | Expected | pval     | qval     |
|------------|-------------------------------------------------------------------------------------------|-----------|-------------|----------|----------|----------|
| GO:2000736 | regulation of stem cell differentiation                                                   | 114       | 20          | 6.49     | 6.10E-06 | 1.39E-04 |
| GO:1903829 | positive regulation of cellular protein localization                                      | 297       | 37          | 16.91    | 6.10E-06 | 1.39E-04 |
| GO:0090181 | regulation of cholesterol metabolic process                                               | 61        | 14          | 3.47     | 6.20E-06 | 1.41E-04 |
| GO:0038094 | Fc-gamma receptor signaling pathway                                                       | 78        | 16          | 4.44     | 6.60E-06 | 1.49E-04 |
| GO:0017038 | protein import                                                                            | 134       | 22          | 7.63     | 6.60E-06 | 1.49E-04 |
| GO:0030832 | regulation of actin filament length                                                       | 134       | 22          | 7.63     | 6.60E-06 | 1.49E-04 |
| GO:1901698 | response to nitrogen compound                                                             | 951       | 87          | 54.14    | 6.60E-06 | 1.49E-04 |
| GO:0071356 | cellular response to tumor necrosis factor                                                | 252       | 33          | 14.35    | 6.70E-06 | 1.50E-04 |
| GO:0043086 | negative regulation of catalytic activity                                                 | 705       | 69          | 40.14    | 6.90E-06 | 1.55E-04 |
| GO:0051651 | maintenance of location in cell                                                           | 70        | 15          | 3.99     | 7.20E-06 | 1.61E-04 |
| GO:0010035 | response to inorganic substance                                                           | 497       | 53          | 28.29    | 7.70E-06 | 1.72E-04 |
| GO:0002431 | Fc receptor mediated stimulatory signaling pathway                                        | 79        | 16          | 4.5      | 7.80E-06 | 1.73E-04 |
| GO:1902930 | regulation of alcohol biosynthetic process                                                | 79        | 16          | 4.5      | 7.80E-06 | 1.73E-04 |
| GO:0010591 | regulation of lamellipodium assembly                                                      | 26        | 9           | 1.48     | 7.80E-06 | 1.73E-04 |
| GO:0045730 | respiratory burst                                                                         | 26        | 9           | 1.48     | 7.80E-06 | 1.73E-04 |
| GO:0000165 | MAPK cascade                                                                              | 831       | 78          | 47.31    | 8.10E-06 | 1.78E-04 |
| GO:0015671 | oxygen transport                                                                          | 15        | 7           | 0.85     | 8.10E-06 | 1.78E-04 |
| GO:0051131 | chaperone-mediated protein complex assembly                                               | 15        | 7           | 0.85     | 8.10E-06 | 1.78E-04 |
| GO:0061684 | chaperone-mediated autophagy                                                              | 15        | 7           | 0.85     | 8.10E-06 | 1.78E-04 |
| GO:0032535 | regulation of cellular component size                                                     | 289       | 36          | 16.45    | 8.20E-06 | 1.80E-04 |
| GO:1903900 | regulation of viral life cycle                                                            | 136       | 22          | 7.74     | 8.40E-06 | 1.84E-04 |
| GO:0051258 | protein polymerization                                                                    | 211       | 29          | 12.01    | 9.40E-06 | 2.05E-04 |
| GO:0060627 | regulation of vesicle-mediated transport                                                  | 450       | 49          | 25.62    | 9.70E-06 | 2.11E-04 |
| GO:0045727 | positive regulation of translation                                                        | 108       | 19          | 6.15     | 9.90E-06 | 2.15E-04 |
| GO:0033209 | tumor necrosis factor-mediated signaling pathway                                          | 158       | 24          | 9        | 1.00E-05 | 2.17E-04 |
| GO:0051851 | modification by host of symbiont morphology or physiology                                 | 72        | 15          | 4.1      | 1.00E-05 | 2.17E-04 |
| GO:0045087 | innate immune response                                                                    | 824       | 77          | 46.91    | 1.10E-05 | 2.37E-04 |
| GO:0045454 | cell redox homeostasis                                                                    | 64        | 14          | 3.64     | 1.10E-05 | 2.37E-04 |
| GO:0034975 | protein folding in endoplasmic reticulum                                                  | 7         | 5           | 0.4      | 1.10E-05 | 2.37E-04 |
| GO:0010608 | posttranscriptional regulation of gene expression                                         | 994       | 89          | 56.59    | 1.20E-05 | 2.56E-04 |
| GO:0034250 | positive regulation of cellular amide metabolic process                                   | 129       | 21          | 7.34     | 1.20E-05 | 2.56E-04 |
| GO:0043154 | negative regulation of cysteine-type endopeptidase activity involved in apoptotic process | 73        | 15          | 4.16     | 1.20E-05 | 2.56E-04 |
| GO:0006403 | RNA localization                                                                          | 192       | 27          | 10.93    | 1.20E-05 | 2.56E-04 |
| GO:0044092 | negative regulation of molecular function                                                 | 1010      | 90          | 57.5     | 1.30E-05 | 2.77E-04 |
| GO:0031325 | positive regulation of cellular metabolic process                                         | 2814      | 209         | 160.21   | 1.40E-05 | 2.97E-04 |
| GO:0034329 | cell junction assembly                                                                    | 204       | 28          | 11.61    | 1.40E-05 | 2.97E-04 |
| GO:0060828 | regulation of canonical Wnt signaling pathway                                             | 250       | 32          | 14.23    | 1.50E-05 | 3.17E-04 |
| GO:2000027 | regulation of animal organ morphogenesis                                                  | 239       | 31          | 13.61    | 1.50E-05 | 3.17E-04 |
| GO:0031400 | negative regulation of protein modification process                                       | 562       | 57          | 32       | 1.60E-05 | 3.37E-04 |
| GO:0010604 | positive regulation of macromolecule metabolic process                                    | 2838      | 210         | 161.57   | 1.60E-05 | 3.37E-04 |
| GO:0032799 | low-density lipoprotein receptor particle metabolic process                               | 22        | 8           | 1.25     | 1.70E-05 | 3.54E-04 |
| GO:0033119 | negative regulation of RNA splicing                                                       | 22        | 8           | 1.25     | 1.70E-05 | 3.54E-04 |
| GO:0042744 | hydrogen peroxide catabolic process                                                       | 22        | 8           | 1.25     | 1.70E-05 | 3.54E-04 |
| GO:0048583 | regulation of response to stimulus                                                        | 3919      | 277         | 223.11   | 1.70E-05 | 3.54E-04 |
| GO:1900180 | regulation of protein localization to nucleus                                             | 112       | 19          | 6.38     | 1.70E-05 | 3.54E-04 |
| GO:0006890 | retrograde vesicle-mediated transport, Golgi to ER                                        | 75        | 15          | 4.27     | 1.70E-05 | 3.54E-04 |
| GO:0030838 | positive regulation of actin filament polymerization                                      | 75        | 15          | 4.27     | 1.70E-05 | 3.54E-04 |
| GO:0045936 | negative regulation of phosphate metabolic process                                        | 538       | 55          | 30.63    | 1.80E-05 | 3.73E-04 |
| GO:0010467 | gene expression                                                                           | 5488      | 371         | 312.44   | 1.80E-05 | 3.73E-04 |
| GO:0010563 | negative regulation of phosphorus metabolic process                                       | 539       | 55          | 30.69    | 1.90E-05 | 3.93E-04 |
| GO:1903362 | regulation of cellular protein catabolic process                                          | 208       | 28          | 11.84    | 2.00E-05 | 4.10E-04 |
| GO:0034599 | cellular response to oxidative stress                                                     | 277       | 34          | 15.77    | 2.00E-05 | 4.10E-04 |
| GO:2000379 | positive regulation of reactive oxygen species metabolic process                          | 94        | 17          | 5.35     | 2.00E-05 | 4.10E-04 |
| GO:0051186 | cofactor metabolic process                                                                | 501       | 52          | 28.52    | 2.00E-05 | 4.10E-04 |
| GO:1901701 | cellular response to oxygen-containing compound                                           | 1022      | 90          | 58.18    | 2.00E-05 | 4.10E-04 |
| GO:0032271 | regulation of protein polymerization                                                      | 165       | 24          | 9.39     | 2.10E-05 | 4.29E-04 |
| GO:0051493 | regulation of cytoskeleton organization                                                   | 438       | 47          | 24.94    | 2.10E-05 | 4.29E-04 |
| GO:0046677 | response to antibiotic                                                                    | 314       | 37          | 17.88    | 2.20E-05 | 4.44E-04 |
| GO:0051276 | chromosome organization                                                                   | 996       | 88          | 56.7     | 2.20E-05 | 4.44E-04 |
| GO:0090201 | negative regulation of release of cytochrome c from mitochondria                          | 17        | 7           | 0.97     | 2.20E-05 | 4.44E-04 |
| GO:1902229 | regulation of intrinsic apoptotic signaling pathway in response to DNA damage             | 36        | 10          | 2.05     | 2.20E-05 | 4.44E-04 |
| GO:1902743 | regulation of lamellipodium organization                                                  | 36        | 10          | 2.05     | 2.20E-05 | 4.44E-04 |
| GO:1904358 | positive regulation of telomere maintenance via telomere lengthening                      | 36        | 10          | 2.05     | 2.20E-05 | 4.44E-04 |
| GO:0055076 | transition metal ion homeostasis                                                          | 95        | 17          | 5.41     | 2.30E-05 | 4.63E-04 |
| GO:1903320 | regulation of protein modification by small protein conjugation or removal                | 199       | 27          | 11.33    | 2.40E-05 | 4.82E-04 |
| GO:0051171 | regulation of nitrogen compound metabolic process                                         | 5116      | 348         | 291.26   | 2.40E-05 | 4.82E-04 |
| GO:0034612 | response to tumor necrosis factor                                                         | 269       | 33          | 15.31    | 2.60E-05 | 5.21E-04 |
| GO:0070201 | regulation of establishment of protein localization                                       | 681       | 65          | 38.77    | 2.80E-05 | 5.60E-04 |
| GO:0051495 | positive regulation of cytoskeleton organization                                          | 190       | 26          | 10.82    | 2.90E-05 | 5.78E-04 |
| GO:1905114 | cell surface receptor signaling pathway involved in cell-cell signaling                   | 561       | 56          | 31.94    | 2.90E-05 | 5.78E-04 |
| GO:0034330 | cell junction organization                                                                | 259       | 32          | 14.75    | 3.00E-05 | 5.96E-04 |
| GO:0002504 | antigen processing and presentation of peptide or polysaccharide antigen via MHC class II | 97        | 17          | 5.52     | 3.00E-05 | 5.96E-04 |
| GO:1903050 | regulation of proteolysis involved in cellular protein catabolic process                  | 180       | 25          | 10.25    | 3.20E-05 | 6.33E-04 |
| GO:0048872 | homeostasis of number of cells                                                            | 225       | 29          | 12.81    | 3.20E-05 | 6.33E-04 |
| GO:0032880 | regulation of protein localization                                                        | 921       | 82          | 52.43    | 3.30E-05 | 6.48E-04 |
| GO:0032970 | regulation of actin filament-based process                                                | 320       | 37          | 18.22    | 3.30E-05 | 6.48E-04 |
| GO:0097581 | lamellipodium organization                                                                | 70        | 14          | 3.99     | 3.30E-05 | 6.48E-04 |
| GO:0016070 | RNA metabolic process                                                                     | 4382      | 303         | 249.47   | 3.30E-05 | 6.48E-04 |
| GO:0030260 | entry into host cell                                                                      | 128       | 20          | 7.29     | 3.60E-05 | 7.02E-04 |
| GO:0044409 | entry into host                                                                           | 128       | 20          | 7.29     | 3.60E-05 | 7.02E-04 |

Supplementary Table S2A: Significant gene ontology categories for expressed genes in MKs

| GO.ID      | Term                                                                                      | Annotated | Significant | Expected | pval     | qval     |
|------------|-------------------------------------------------------------------------------------------|-----------|-------------|----------|----------|----------|
| GO:0051806 | entry into cell of other organism involved in symbiotic interaction                       | 128       | 20          | 7.29     | 3.60E-05 | 7.02E-04 |
| GO:0051828 | entry into other organism involved in symbiotic interaction                               | 128       | 20          | 7.29     | 3.60E-05 | 7.02E-04 |
| GO:0019068 | virion assembly                                                                           | 38        | 10          | 2.16     | 3.70E-05 | 7.20E-04 |
| GO:0051099 | positive regulation of binding                                                            | 171       | 24          | 9.74     | 3.80E-05 | 7.38E-04 |
| GO:0006873 | cellular ion homeostasis                                                                  | 501       | 51          | 28.52    | 4.00E-05 | 7.74E-04 |
| GO:0035556 | intracellular signal transduction                                                         | 2450      | 183         | 139.48   | 4.00E-05 | 7.74E-04 |
| GO:0032802 | low-density lipoprotein particle receptor catabolic process                               | 13        | 6           | 0.74     | 4.10E-05 | 7.90E-04 |
| GO:0050851 | antigen receptor-mediated signaling pathway                                               | 205       | 27          | 11.67    | 4.10E-05 | 7.90E-04 |
| GO:0042180 | cellular ketone metabolic process                                                         | 228       | 29          | 12.98    | 4.10E-05 | 7.90E-04 |
| GO:0030100 | regulation of endocytosis                                                                 | 252       | 31          | 14.35    | 4.40E-05 | 8.46E-04 |
| GO:2000117 | negative regulation of cysteine-type endopeptidase activity                               | 81        | 15          | 4.61     | 4.50E-05 | 8.64E-04 |
| GO:0031396 | regulation of protein ubiquitination                                                      | 173       | 24          | 9.85     | 4.70E-05 | 8.99E-04 |
| GO:0051098 | regulation of binding                                                                     | 350       | 39          | 19.93    | 4.70E-05 | 8.99E-04 |
| GO:0042273 | ribosomal large subunit biogenesis                                                        | 25        | 8           | 1.42     | 4.90E-05 | 9.34E-04 |
| GO:0048857 | neural nucleus development                                                                | 55        | 12          | 3.13     | 4.90E-05 | 9.34E-04 |
| GO:0061136 | regulation of proteasomal protein catabolic process                                       | 152       | 22          | 8.65     | 5.00E-05 | 9.48E-04 |
| GO:0075525 | viral translational termination-reinitiation                                              | 5         | 4           | 0.28     | 5.00E-05 | 9.48E-04 |
| GO:1902255 | positive regulation of intrinsic apoptotic signaling pathway by p53 class mediator        | 5         | 4           | 0.28     | 5.00E-05 | 9.48E-04 |
| GO:0007568 | aging                                                                                     | 302       | 35          | 17.19    | 5.10E-05 | 9.65E-04 |
| GO:0016999 | antibiotic metabolic process                                                              | 121       | 19          | 6.89     | 5.20E-05 | 9.79E-04 |
| GO:0010155 | regulation of proton transport                                                            | 19        | 7           | 1.08     | 5.20E-05 | 9.79E-04 |
| GO:0045859 | regulation of protein kinase activity                                                     | 695       | 65          | 39.57    | 5.20E-05 | 9.79E-04 |
| GO:0043280 | positive regulation of cysteine-type endopeptidase activity involved in apoptotic process | 111       | 18          | 6.32     | 5.30E-05 | 9.95E-04 |
| GO:0031349 | positive regulation of defense response                                                   | 480       | 49          | 27.33    | 5.30E-05 | 9.95E-04 |
| GO:0030041 | actin filament polymerization                                                             | 132       | 20          | 7.51     | 5.60E-05 | 1.05E-03 |
| GO:0032507 | maintenance of protein location in cell                                                   | 56        | 12          | 3.19     | 5.90E-05 | 1.10E-03 |
| GO:2001244 | positive regulation of intrinsic apoptotic signaling pathway                              | 56        | 12          | 3.19     | 5.90E-05 | 1.10E-03 |
| GO:0050794 | regulation of cellular process                                                            | 9281      | 584         | 528.38   | 6.00E-05 | 1.11E-03 |
| GO:0007010 | cytoskeleton organization                                                                 | 1038      | 89          | 59.09    | 6.00E-05 | 1.11E-03 |
| GO:1903573 | negative regulation of response to endoplasmic reticulum stress                           | 40        | 10          | 2.28     | 6.00E-05 | 1.11E-03 |
| GO:0071407 | cellular response to organic cyclic compound                                              | 509       | 51          | 28.98    | 6.00E-05 | 1.11E-03 |
| GO:0055082 | cellular chemical homeostasis                                                             | 630       | 60          | 35.87    | 6.10E-05 | 1.13E-03 |
| GO:0002244 | hematopoietic progenitor cell differentiation                                             | 154       | 22          | 8.77     | 6.10E-05 | 1.13E-03 |
| GO:0044283 | small molecule biosynthetic process                                                       | 685       | 64          | 39       | 6.10E-05 | 1.13E-03 |
| GO:2000377 | regulation of reactive oxygen species metabolic process                                   | 176       | 24          | 10.02    | 6.20E-05 | 1.14E-03 |
| GO:0051881 | regulation of mitochondrial membrane potential                                            | 65        | 13          | 3.7      | 6.30E-05 | 1.16E-03 |
| GO:0019886 | antigen processing and presentation of exogenous peptide antigen via MHC class II         | 93        | 16          | 5.29     | 6.50E-05 | 1.19E-03 |
| GO:0009968 | negative regulation of signal transduction                                                | 1186      | 99          | 67.52    | 6.50E-05 | 1.19E-03 |
| GO:0032212 | positive regulation of telomere maintenance via telomerase                                | 33        | 9           | 1.88     | 6.70E-05 | 1.23E-03 |
| GO:0051054 | positive regulation of DNA metabolic process                                              | 200       | 26          | 11.39    | 7.00E-05 | 1.28E-03 |
| GO:0030178 | negative regulation of Wnt signaling pathway                                              | 189       | 25          | 10.76    | 7.20E-05 | 1.31E-03 |
| GO:0022406 | membrane docking                                                                          | 145       | 21          | 8.26     | 7.30E-05 | 1.33E-03 |
| GO:0051173 | positive regulation of nitrogen compound metabolic process                                | 2683      | 196         | 152.75   | 7.40E-05 | 1.34E-03 |
| GO:0006826 | iron ion transport                                                                        | 49        | 11          | 2.79     | 7.60E-05 | 1.38E-03 |
| GO:0002262 | myeloid cell homeostasis                                                                  | 135       | 20          | 7.69     | 7.70E-05 | 1.39E-03 |
| GO:0007165 | signal transduction                                                                       | 5132      | 345         | 292.17   | 7.80E-05 | 1.41E-03 |
| GO:0051348 | negative regulation of transferase activity                                               | 260       | 31          | 14.8     | 7.90E-05 | 1.42E-03 |
| GO:0030111 | regulation of Wnt signaling pathway                                                       | 321       | 36          | 18.28    | 7.90E-05 | 1.42E-03 |
| GO:0030003 | cellular cation homeostasis                                                               | 488       | 49          | 27.78    | 8.00E-05 | 1.44E-03 |
| GO:1902533 | positive regulation of intracellular signal transduction                                  | 960       | 83          | 54.65    | 8.10E-05 | 1.46E-03 |
| GO:0046718 | viral entry into host cell                                                                | 115       | 18          | 6.55     | 8.50E-05 | 1.52E-03 |
| GO:0046916 | cellular transition metal ion homeostasis                                                 | 76        | 14          | 4.33     | 8.60E-05 | 1.54E-03 |
| GO:0006734 | NADH metabolic process                                                                    | 34        | 9           | 1.94     | 8.70E-05 | 1.56E-03 |
| GO:0006694 | steroid biosynthetic process                                                              | 180       | 24          | 10.25    | 8.80E-05 | 1.57E-03 |
| GO:0051640 | organelle localization                                                                    | 584       | 56          | 33.25    | 8.90E-05 | 1.59E-03 |
| GO:0051050 | positive regulation of transport                                                          | 891       | 78          | 50.73    | 9.00E-05 | 1.60E-03 |
| GO:0010951 | negative regulation of endopeptidase activity                                             | 192       | 25          | 10.93    | 9.40E-05 | 1.67E-03 |
| GO:2000059 | negative regulation of ubiquitin-dependent protein catabolic process                      | 42        | 10          | 2.39     | 9.40E-05 | 1.67E-03 |
| GO:0007169 | transmembrane receptor protein tyrosine kinase signaling pathway                          | 640       | 60          | 36.44    | 9.50E-05 | 1.68E-03 |
| GO:0002495 | antigen processing and presentation of peptide antigen via MHC class II                   | 96        | 16          | 5.47     | 9.60E-05 | 1.70E-03 |
| GO:0010466 | negative regulation of peptidase activity                                                 | 204       | 26          | 11.61    | 9.80E-05 | 1.73E-03 |
| GO:0043170 | macromolecule metabolic process                                                           | 8778      | 554         | 499.74   | 1.00E-04 | 1.76E-03 |
| GO:0007167 | enzyme linked receptor protein signaling pathway                                          | 924       | 80          | 52.6     | 1.00E-04 | 1.76E-03 |
| GO:0030833 | regulation of actin filament polymerization                                               | 117       | 18          | 6.66     | 1.10E-04 | 1.92E-03 |
| GO:1901798 | positive regulation of signal transduction by p53 class mediator                          | 21        | 7           | 1.2      | 1.10E-04 | 1.92E-03 |
| GO:0051347 | positive regulation of transferase activity                                               | 575       | 55          | 32.74    | 1.10E-04 | 1.92E-03 |
| GO:1901998 | toxin transport                                                                           | 35        | 9           | 1.99     | 1.10E-04 | 1.92E-03 |
| GO:0071900 | regulation of protein serine/threonine kinase activity                                    | 455       | 46          | 25.9     | 1.10E-04 | 1.92E-03 |
| GO:0032956 | regulation of actin cytoskeleton organization                                             | 277       | 32          | 15.77    | 1.10E-04 | 1.92E-03 |
| GO:0000302 | response to reactive oxygen species                                                       | 218       | 27          | 12.41    | 1.20E-04 | 2.07E-03 |
| GO:0042326 | negative regulation of phosphorylation                                                    | 430       | 44          | 24.48    | 1.20E-04 | 2.07E-03 |
| GO:0010458 | exit from mitosis                                                                         | 28        | 8           | 1.59     | 1.20E-04 | 2.07E-03 |
| GO:0032879 | regulation of localization                                                                | 2500      | 183         | 142.33   | 1.20E-04 | 2.07E-03 |
| GO:0046890 | regulation of lipid biosynthetic process                                                  | 184       | 24          | 10.48    | 1.20E-04 | 2.07E-03 |
| GO:0000209 | protein polyubiquitination                                                                | 279       | 32          | 15.88    | 1.30E-04 | 2.24E-03 |
| GO:0098771 | inorganic ion homeostasis                                                                 | 565       | 54          | 32.17    | 1.30E-04 | 2.24E-03 |
| GO:0043624 | cellular protein complex disassembly                                                      | 185       | 24          | 10.53    | 1.40E-04 | 2.39E-03 |
| GO:0055080 | cation homeostasis                                                                        | 553       | 53          | 31.48    | 1.40E-04 | 2.39E-03 |
| GO:0060249 | anatomical structure homeostasis                                                          | 381       | 40          | 21.69    | 1.40E-04 | 2.39E-03 |
| GO:2000278 | regulation of DNA biosynthetic process                                                    | 99        | 16          | 5.64     | 1.40E-04 | 2.39E-03 |



Supplementary Table S2A: Significant gene ontology categories for expressed genes in MKs

| GO.ID      | Term                                                                                                    | Annotated | Significant | Expected | pval     | qval     |
|------------|---------------------------------------------------------------------------------------------------------|-----------|-------------|----------|----------|----------|
| GO:0099132 | ATP hydrolysis coupled cation transmembrane transport                                                   | 36        | 9           | 2.05     | 1.40E-04 | 2.39E-03 |
| GO:0051438 | regulation of ubiquitin-protein transferase activity                                                    | 44        | 10          | 2.5      | 1.40E-04 | 2.39E-03 |
| GO:0110053 | regulation of actin filament organization                                                               | 209       | 26          | 11.9     | 1.50E-04 | 2.55E-03 |
| GO:0051259 | protein complex oligomerization                                                                         | 541       | 52          | 30.8     | 1.50E-04 | 2.55E-03 |
| GO:1904666 | regulation of ubiquitin protein ligase activity                                                         | 22        | 7           | 1.25     | 1.50E-04 | 2.55E-03 |
| GO:1902253 | regulation of intrinsic apoptotic signaling pathway by p53 class mediator                               | 29        | 8           | 1.65     | 1.60E-04 | 2.71E-03 |
| GO:0031589 | cell-substrate adhesion                                                                                 | 307       | 34          | 17.48    | 1.60E-04 | 2.71E-03 |
| GO:0048024 | regulation of mRNA splicing, via spliceosome                                                            | 71        | 13          | 4.04     | 1.60E-04 | 2.71E-03 |
| GO:1903051 | negative regulation of proteolysis involved in cellular protein catabolic process                       | 62        | 12          | 3.53     | 1.70E-04 | 2.86E-03 |
| GO:0055085 | transmembrane transport                                                                                 | 1351      | 108         | 76.91    | 1.70E-04 | 2.86E-03 |
| GO:0090066 | regulation of anatomical structure size                                                                 | 411       | 42          | 23.4     | 1.70E-04 | 2.86E-03 |
| GO:0034101 | erythrocyte homeostasis                                                                                 | 111       | 17          | 6.32     | 1.70E-04 | 2.86E-03 |
| GO:0048585 | negative regulation of response to stimulus                                                             | 1520      | 119         | 86.54    | 1.80E-04 | 2.98E-03 |
| GO:0051336 | regulation of hydrolase activity                                                                        | 1086      | 90          | 61.83    | 1.80E-04 | 2.98E-03 |
| GO:0019322 | pentose biosynthetic process                                                                            | 3         | 3           | 0.17     | 1.80E-04 | 2.98E-03 |
| GO:0044502 | positive regulation of signal transduction in other organism                                            | 3         | 3           | 0.17     | 1.80E-04 | 2.98E-03 |
| GO:0052470 | modulation by host of symbiont signal transduction pathway                                              | 3         | 3           | 0.17     | 1.80E-04 | 2.98E-03 |
| GO:0052525 | positive regulation by host of symbiont signal transduction pathway                                     | 3         | 3           | 0.17     | 1.80E-04 | 2.98E-03 |
| GO:0052526 | positive regulation by organism of signal transduction in other organism involved in symbiotic inter... | 3         | 3           | 0.17     | 1.80E-04 | 2.98E-03 |
| GO:0075205 | modulation by host of symbiont cAMP-mediated signal transduction                                        | 3         | 3           | 0.17     | 1.80E-04 | 2.98E-03 |
| GO:0075206 | positive regulation by host of symbiont cAMP-mediated signal transduction                               | 3         | 3           | 0.17     | 1.80E-04 | 2.98E-03 |
| GO:0006283 | transcription-coupled nucleotide-excision repair                                                        | 72        | 13          | 4.1      | 1.90E-04 | 3.14E-03 |
| GO:0030032 | lamellipodium assembly                                                                                  | 54        | 11          | 3.07     | 1.90E-04 | 3.14E-03 |
| GO:0072655 | establishment of protein localization to mitochondrion                                                  | 112       | 17          | 6.38     | 1.90E-04 | 3.14E-03 |
| GO:0034446 | substrate adhesion-dependent cell spreading                                                             | 82        | 14          | 4.67     | 2.00E-04 | 3.29E-03 |
| GO:0045116 | protein neddylation                                                                                     | 11        | 5           | 0.63     | 2.00E-04 | 3.29E-03 |
| GO:0031399 | regulation of protein modification process                                                              | 1601      | 124         | 91.15    | 2.00E-04 | 3.29E-03 |
| GO:1902175 | regulation of oxidative stress-induced intrinsic apoptotic signaling pathway                            | 23        | 7           | 1.31     | 2.10E-04 | 3.43E-03 |
| GO:2001252 | positive regulation of chromosome organization                                                          | 156       | 21          | 8.88     | 2.10E-04 | 3.43E-03 |
| GO:0031667 | response to nutrient levels                                                                             | 441       | 44          | 25.11    | 2.10E-04 | 3.43E-03 |
| GO:0008637 | apoptotic mitochondrial changes                                                                         | 113       | 17          | 6.43     | 2.20E-04 | 3.59E-03 |
| GO:0008631 | intrinsic apoptotic signaling pathway in response to oxidative stress                                   | 38        | 9           | 2.16     | 2.20E-04 | 3.59E-03 |
| GO:0034470 | ncRNA processing                                                                                        | 263       | 30          | 14.97    | 2.30E-04 | 3.73E-03 |
| GO:0035967 | cellular response to topologically incorrect protein                                                    | 124       | 18          | 7.06     | 2.30E-04 | 3.73E-03 |
| GO:0001836 | release of cytochrome c from mitochondria                                                               | 55        | 11          | 3.13     | 2.30E-04 | 3.73E-03 |
| GO:0000723 | telomere maintenance                                                                                    | 146       | 20          | 8.31     | 2.30E-04 | 3.73E-03 |
| GO:0032930 | positive regulation of superoxide anion generation                                                      | 17        | 6           | 0.97     | 2.40E-04 | 3.88E-03 |
| GO:0071800 | podosome assembly                                                                                       | 17        | 6           | 0.97     | 2.40E-04 | 3.88E-03 |
| GO:0034660 | ncRNA metabolic process                                                                                 | 431       | 43          | 24.54    | 2.50E-04 | 4.02E-03 |
| GO:0009991 | response to extracellular stimulus                                                                      | 471       | 46          | 26.81    | 2.50E-04 | 4.02E-03 |
| GO:1903363 | negative regulation of cellular protein catabolic process                                               | 74        | 13          | 4.21     | 2.50E-04 | 4.02E-03 |
| GO:0044089 | positive regulation of cellular component biogenesis                                                    | 458       | 45          | 26.07    | 2.50E-04 | 4.02E-03 |
| GO:0048013 | ephrin receptor signaling pathway                                                                       | 84        | 14          | 4.78     | 2.60E-04 | 4.17E-03 |
| GO:0048193 | Golgi vesicle transport                                                                                 | 290       | 32          | 16.51    | 2.60E-04 | 4.17E-03 |
| GO:0034620 | cellular response to unfolded protein                                                                   | 115       | 17          | 6.55     | 2.70E-04 | 4.30E-03 |
| GO:0043549 | regulation of kinase activity                                                                           | 764       | 67          | 43.5     | 2.70E-04 | 4.30E-03 |
| GO:0032200 | telomere organization                                                                                   | 159       | 21          | 9.05     | 2.70E-04 | 4.30E-03 |
| GO:0045010 | actin nucleation                                                                                        | 39        | 9           | 2.22     | 2.70E-04 | 4.30E-03 |
| GO:0140056 | organelle localization by membrane tethering                                                            | 137       | 19          | 7.8      | 2.80E-04 | 4.44E-03 |
| GO:0032386 | regulation of intracellular transport                                                                   | 368       | 38          | 20.95    | 2.80E-04 | 4.44E-03 |
| GO:0030968 | endoplasmic reticulum unfolded protein response                                                         | 105       | 16          | 5.98     | 2.80E-04 | 4.44E-03 |
| GO:0010952 | positive regulation of peptidase activity                                                               | 171       | 22          | 9.74     | 2.90E-04 | 4.59E-03 |
| GO:0060070 | canonical Wnt signaling pathway                                                                         | 292       | 32          | 16.62    | 2.90E-04 | 4.59E-03 |
| GO:0001933 | negative regulation of protein phosphorylation                                                          | 395       | 40          | 22.49    | 3.00E-04 | 4.72E-03 |
| GO:0070585 | protein localization to mitochondrion                                                                   | 116       | 17          | 6.6      | 3.00E-04 | 4.72E-03 |
| GO:0031099 | regeneration                                                                                            | 183       | 23          | 10.42    | 3.00E-04 | 4.72E-03 |
| GO:0016236 | macroautophagy                                                                                          | 255       | 29          | 14.52    | 3.00E-04 | 4.72E-03 |
| GO:0010648 | negative regulation of cell communication                                                               | 1282      | 102         | 72.99    | 3.10E-04 | 4.85E-03 |
| GO:0000910 | cytokinesis                                                                                             | 138       | 19          | 7.86     | 3.10E-04 | 4.85E-03 |
| GO:0032206 | positive regulation of telomere maintenance                                                             | 48        | 10          | 2.73     | 3.10E-04 | 4.85E-03 |
| GO:0051187 | cofactor catabolic process                                                                              | 48        | 10          | 2.73     | 3.10E-04 | 4.85E-03 |
| GO:0043388 | positive regulation of DNA binding                                                                      | 57        | 11          | 3.25     | 3.20E-04 | 4.97E-03 |
| GO:1904356 | regulation of telomere maintenance via telomere lengthening                                             | 57        | 11          | 3.25     | 3.20E-04 | 4.97E-03 |
| GO:0009157 | deoxyribonucleoside monophosphate biosynthetic process                                                  | 7         | 4           | 0.4      | 3.20E-04 | 4.97E-03 |
| GO:0051683 | establishment of Golgi localization                                                                     | 7         | 4           | 0.4      | 3.20E-04 | 4.97E-03 |
| GO:0071353 | cellular response to interleukin-4                                                                      | 32        | 8           | 1.82     | 3.30E-04 | 5.11E-03 |
| GO:0045069 | regulation of viral genome replication                                                                  | 86        | 14          | 4.9      | 3.30E-04 | 5.11E-03 |
| GO:0070493 | thrombin-activated receptor signaling pathway                                                           | 12        | 5           | 0.68     | 3.30E-04 | 5.11E-03 |
| GO:2001056 | positive regulation of cysteine-type endopeptidase activity                                             | 128       | 18          | 7.29     | 3.40E-04 | 5.22E-03 |
| GO:0050801 | ion homeostasis                                                                                         | 629       | 57          | 35.81    | 3.40E-04 | 5.22E-03 |
| GO:0023057 | negative regulation of signaling                                                                        | 1286      | 102         | 73.21    | 3.40E-04 | 5.22E-03 |
| GO:0010523 | negative regulation of calcium ion transport into cytosol                                               | 18        | 6           | 1.02     | 3.40E-04 | 5.22E-03 |
| GO:0042026 | protein refolding                                                                                       | 18        | 6           | 1.02     | 3.40E-04 | 5.22E-03 |
| GO:0070987 | error-free translesion synthesis                                                                        | 18        | 6           | 1.02     | 3.40E-04 | 5.22E-03 |
| GO:0019752 | carboxylic acid metabolic process                                                                       | 945       | 79          | 53.8     | 3.50E-04 | 5.36E-03 |
| GO:0071479 | cellular response to ionizing radiation                                                                 | 67        | 12          | 3.81     | 3.60E-04 | 5.49E-03 |
| GO:0031330 | negative regulation of cellular catabolic process                                                       | 221       | 26          | 12.58    | 3.60E-04 | 5.49E-03 |
| GO:0008202 | steroid metabolic process                                                                               | 308       | 33          | 17.53    | 3.60E-04 | 5.49E-03 |
| GO:0032210 | regulation of telomere maintenance via telomerase                                                       | 49        | 10          | 2.79     | 3.70E-04 | 5.62E-03 |
| GO:0030194 | positive regulation of blood coagulation                                                                | 25        | 7           | 1.42     | 3.70E-04 | 5.62E-03 |

Supplementary Table S2A: Significant gene ontology categories for expressed genes in MKs

| GO.ID      | Term                                                                                | Annotated | Significant | Expected | pval     | qval     |
|------------|-------------------------------------------------------------------------------------|-----------|-------------|----------|----------|----------|
| GO:1900048 | positive regulation of hemostasis                                                   | 25        | 7           | 1.42     | 3.70E-04 | 5.62E-03 |
| GO:1903321 | negative regulation of protein modification by small protein conjugation or removal | 77        | 13          | 4.38     | 3.70E-04 | 5.62E-03 |
| GO:009889  | regulation of biosynthetic process                                                  | 3824      | 261         | 217.71   | 3.80E-04 | 5.76E-03 |
| GO:0051051 | negative regulation of transport                                                    | 468       | 45          | 26.64    | 4.00E-04 | 6.05E-03 |
| GO:0017001 | antibiotic catabolic process                                                        | 41        | 9           | 2.33     | 4.10E-04 | 6.16E-03 |
| GO:0090382 | phagosome maturation                                                                | 41        | 9           | 2.33     | 4.10E-04 | 6.16E-03 |
| GO:0007154 | cell communication                                                                  | 5575      | 365         | 317.39   | 4.10E-04 | 6.16E-03 |
| GO:0055072 | iron ion homeostasis                                                                | 68        | 12          | 3.87     | 4.10E-04 | 6.16E-03 |
| GO:0009895 | negative regulation of catabolic process                                            | 260       | 29          | 14.8     | 4.10E-04 | 6.16E-03 |
| GO:0045070 | positive regulation of viral genome replication                                     | 33        | 8           | 1.88     | 4.20E-04 | 6.30E-03 |
| GO:0051301 | cell division                                                                       | 537       | 50          | 30.57    | 4.20E-04 | 6.30E-03 |
| GO:0097305 | response to alcohol                                                                 | 224       | 26          | 12.75    | 4.40E-04 | 6.59E-03 |
| GO:0043112 | receptor metabolic process                                                          | 165       | 21          | 9.39     | 4.50E-04 | 6.71E-03 |
| GO:0009966 | regulation of signal transduction                                                   | 3047      | 213         | 173.47   | 4.50E-04 | 6.71E-03 |
| GO:0019216 | regulation of lipid metabolic process                                               | 377       | 38          | 21.46    | 4.50E-04 | 6.71E-03 |
| GO:0006606 | protein import into nucleus                                                         | 99        | 15          | 5.64     | 4.60E-04 | 6.85E-03 |
| GO:0031397 | negative regulation of protein ubiquitination                                       | 69        | 12          | 3.93     | 4.70E-04 | 6.98E-03 |
| GO:0009605 | response to external stimulus                                                       | 2119      | 155         | 120.64   | 4.70E-04 | 6.98E-03 |
| GO:0032069 | regulation of nuclease activity                                                     | 19        | 6           | 1.08     | 4.80E-04 | 7.07E-03 |
| GO:0006735 | NADH regeneration                                                                   | 26        | 7           | 1.48     | 4.80E-04 | 7.07E-03 |
| GO:0050820 | positive regulation of coagulation                                                  | 26        | 7           | 1.48     | 4.80E-04 | 7.07E-03 |
| GO:0061621 | canonical glycolysis                                                                | 26        | 7           | 1.48     | 4.80E-04 | 7.07E-03 |
| GO:0061718 | glucose catabolic process to pyruvate                                               | 26        | 7           | 1.48     | 4.80E-04 | 7.07E-03 |
| GO:1904951 | positive regulation of establishment of protein localization                        | 418       | 41          | 23.8     | 4.80E-04 | 7.07E-03 |
| GO:0071806 | protein transmembrane transport                                                     | 42        | 9           | 2.39     | 4.90E-04 | 7.21E-03 |
| GO:0070670 | response to interleukin-4                                                           | 34        | 8           | 1.94     | 5.20E-04 | 7.61E-03 |
| GO:0072595 | maintenance of protein localization in organelle                                    | 34        | 8           | 1.94     | 5.20E-04 | 7.61E-03 |
| GO:0044794 | positive regulation by host of viral process                                        | 13        | 5           | 0.74     | 5.20E-04 | 7.61E-03 |
| GO:0071801 | regulation of podosome assembly                                                     | 13        | 5           | 0.74     | 5.20E-04 | 7.61E-03 |
| GO:0010822 | positive regulation of mitochondrion organization                                   | 111       | 16          | 6.32     | 5.30E-04 | 7.74E-03 |
| GO:0050793 | regulation of developmental process                                                 | 2427      | 174         | 138.17   | 5.40E-04 | 7.86E-03 |
| GO:0034381 | plasma lipoprotein particle clearance                                               | 70        | 12          | 3.99     | 5.40E-04 | 7.86E-03 |
| GO:0034502 | protein localization to chromosome                                                  | 70        | 12          | 3.99     | 5.40E-04 | 7.86E-03 |
| GO:0033044 | regulation of chromosome organization                                               | 290       | 31          | 16.51    | 5.60E-04 | 8.13E-03 |
| GO:0048878 | chemical homeostasis                                                                | 960       | 79          | 54.65    | 5.60E-04 | 8.13E-03 |
| GO:0097006 | regulation of plasma lipoprotein particle levels                                    | 101       | 15          | 5.75     | 5.70E-04 | 8.26E-03 |
| GO:0071363 | cellular response to growth factor stimulus                                         | 643       | 57          | 36.61    | 5.80E-04 | 8.40E-03 |
| GO:0006596 | polyamine biosynthetic process                                                      | 8         | 4           | 0.46     | 6.10E-04 | 8.80E-03 |
| GO:0060316 | positive regulation of ryanodine-sensitive calcium-release channel activity         | 8         | 4           | 0.46     | 6.10E-04 | 8.80E-03 |
| GO:0075713 | establishment of integrated proviral latency                                        | 8         | 4           | 0.46     | 6.10E-04 | 8.80E-03 |
| GO:0034314 | Arp2/3 complex-mediated actin nucleation                                            | 27        | 7           | 1.54     | 6.20E-04 | 8.89E-03 |
| GO:0061615 | glycolytic process through fructose-6-phosphate                                     | 27        | 7           | 1.54     | 6.20E-04 | 8.89E-03 |
| GO:0061620 | glycolytic process through glucose-6-phosphate                                      | 27        | 7           | 1.54     | 6.20E-04 | 8.89E-03 |
| GO:0071480 | cellular response to gamma radiation                                                | 27        | 7           | 1.54     | 6.20E-04 | 8.89E-03 |
| GO:0007339 | binding of sperm to zona pellucida                                                  | 35        | 8           | 1.99     | 6.40E-04 | 9.17E-03 |
| GO:0050865 | regulation of cell activation                                                       | 506       | 47          | 28.81    | 6.50E-04 | 9.29E-03 |
| GO:0000715 | nucleotide-excision repair, DNA damage recognition                                  | 20        | 6           | 1.14     | 6.50E-04 | 9.29E-03 |
| GO:2000058 | regulation of ubiquitin-dependent protein catabolic process                         | 124       | 17          | 7.06     | 6.60E-04 | 9.42E-03 |
| GO:0097711 | ciliary basal body-plasma membrane docking                                          | 92        | 14          | 5.24     | 6.70E-04 | 9.55E-03 |
| GO:0006875 | cellular metal ion homeostasis                                                      | 439       | 42          | 24.99    | 6.90E-04 | 9.82E-03 |
| GO:0032204 | regulation of telomere maintenance                                                  | 72        | 12          | 4.1      | 7.00E-04 | 9.82E-03 |
| GO:0006952 | defense response                                                                    | 1512      | 115         | 86.08    | 7.00E-04 | 9.82E-03 |
| GO:0000028 | ribosomal small subunit assembly                                                    | 4         | 3           | 0.23     | 7.00E-04 | 9.82E-03 |
| GO:0005997 | xylulose metabolic process                                                          | 4         | 3           | 0.23     | 7.00E-04 | 9.82E-03 |
| GO:0030043 | actin filament fragmentation                                                        | 4         | 3           | 0.23     | 7.00E-04 | 9.82E-03 |
| GO:0051343 | positive regulation of cyclic-nucleotide phosphodiesterase activity                 | 4         | 3           | 0.23     | 7.00E-04 | 9.82E-03 |
| GO:0071787 | endoplasmic reticulum tubular network formation                                     | 4         | 3           | 0.23     | 7.00E-04 | 9.82E-03 |
| GO:0090666 | scaRNA localization to Cajal body                                                   | 4         | 3           | 0.23     | 7.00E-04 | 9.82E-03 |
| GO:1905908 | positive regulation of amyloid fibril formation                                     | 4         | 3           | 0.23     | 7.00E-04 | 9.82E-03 |
| GO:2000152 | regulation of ubiquitin-specific protease activity                                  | 4         | 3           | 0.23     | 7.00E-04 | 9.82E-03 |
| GO:0090199 | regulation of release of cytochrome c from mitochondria                             | 44        | 9           | 2.5      | 7.00E-04 | 9.82E-03 |
| GO:0050684 | regulation of mRNA processing                                                       | 103       | 15          | 5.86     | 7.10E-04 | 9.91E-03 |
| GO:0030521 | androgen receptor signaling pathway                                                 | 53        | 10          | 3.02     | 7.10E-04 | 9.91E-03 |
| GO:1901135 | carbohydrate derivative metabolic process                                           | 1057      | 85          | 60.18    | 7.10E-04 | 9.91E-03 |
| GO:0051346 | negative regulation of hydrolase activity                                           | 386       | 38          | 21.98    | 7.10E-04 | 9.91E-03 |
| GO:0031468 | nuclear envelope reassembly                                                         | 14        | 5           | 0.8      | 7.70E-04 | 1.07E-02 |
| GO:0043558 | regulation of translational initiation in response to stress                        | 14        | 5           | 0.8      | 7.70E-04 | 1.07E-02 |
| GO:0051280 | negative regulation of release of sequestered calcium ion into cytosol              | 14        | 5           | 0.8      | 7.70E-04 | 1.07E-02 |
| GO:0042542 | response to hydrogen peroxide                                                       | 137       | 18          | 7.8      | 7.70E-04 | 1.07E-02 |
| GO:0046782 | regulation of viral transcription                                                   | 63        | 11          | 3.59     | 7.70E-04 | 1.07E-02 |
| GO:0046596 | regulation of viral entry into host cell                                            | 28        | 7           | 1.59     | 7.80E-04 | 1.08E-02 |
| GO:0090383 | phagosome acidification                                                             | 28        | 7           | 1.59     | 7.80E-04 | 1.08E-02 |
| GO:0045595 | regulation of cell differentiation                                                  | 1703      | 127         | 96.95    | 7.90E-04 | 1.09E-02 |
| GO:0023052 | signaling                                                                           | 5555      | 361         | 316.25   | 8.20E-04 | 1.13E-02 |
| GO:0007006 | mitochondrial membrane organization                                                 | 94        | 14          | 5.35     | 8.40E-04 | 1.16E-02 |
| GO:0055065 | metal ion homeostasis                                                               | 499       | 46          | 28.41    | 8.60E-04 | 1.18E-02 |
| GO:0032928 | regulation of superoxide anion generation                                           | 21        | 6           | 1.2      | 8.70E-04 | 1.20E-02 |
| GO:0036473 | cell death in response to oxidative stress                                          | 84        | 13          | 4.78     | 8.80E-04 | 1.21E-02 |
| GO:0070848 | response to growth factor                                                           | 669       | 58          | 38.09    | 9.00E-04 | 1.23E-02 |
| GO:0018208 | peptidyl-proline modification                                                       | 37        | 8           | 2.11     | 9.40E-04 | 1.28E-02 |

Supplementary Table S2A: Significant gene ontology categories for expressed genes in MKs

| GO.ID      | Term                                                                                   | Annotated | Significant | Expected | pval     | qval     |
|------------|----------------------------------------------------------------------------------------|-----------|-------------|----------|----------|----------|
| GO:0032506 | cytokinetic process                                                                    | 37        | 8           | 2.11     | 9.40E-04 | 1.28E-02 |
| GO:0023051 | regulation of signaling                                                                | 3400      | 232         | 193.57   | 9.40E-04 | 1.28E-02 |
| GO:0006468 | protein phosphorylation                                                                | 1727      | 128         | 98.32    | 9.50E-04 | 1.30E-02 |
| GO:0032446 | protein modification by small protein conjugation                                      | 816       | 68          | 46.46    | 9.70E-04 | 1.32E-02 |
| GO:0050690 | regulation of defense response to virus by virus                                       | 29        | 7           | 1.65     | 9.80E-04 | 1.33E-02 |
| GO:0061462 | protein localization to lysosome                                                       | 29        | 7           | 1.65     | 9.80E-04 | 1.33E-02 |
| GO:1902230 | negative regulation of intrinsic apoptotic signaling pathway in response to DNA damage | 29        | 7           | 1.65     | 9.80E-04 | 1.33E-02 |
| GO:0010950 | positive regulation of endopeptidase activity                                          | 152       | 19          | 8.65     | 1.03E-03 | 1.39E-02 |
| GO:0051017 | actin filament bundle assembly                                                         | 129       | 17          | 7.34     | 1.03E-03 | 1.39E-02 |
| GO:0061572 | actin filament bundle organization                                                     | 129       | 17          | 7.34     | 1.03E-03 | 1.39E-02 |
| GO:0019043 | establishment of viral latency                                                         | 9         | 4           | 0.51     | 1.04E-03 | 1.40E-02 |
| GO:0071803 | positive regulation of podosome assembly                                               | 9         | 4           | 0.51     | 1.04E-03 | 1.40E-02 |
| GO:1904667 | negative regulation of ubiquitin protein ligase activity                               | 9         | 4           | 0.51     | 1.04E-03 | 1.40E-02 |
| GO:0030518 | intracellular steroid hormone receptor signaling pathway                               | 118       | 16          | 6.72     | 1.05E-03 | 1.41E-02 |
| GO:0032502 | developmental process                                                                  | 5591      | 362         | 318.3    | 1.07E-03 | 1.44E-02 |
| GO:0051284 | positive regulation of sequestering of calcium ion                                     | 15        | 5           | 0.85     | 1.10E-03 | 1.47E-02 |
| GO:1990000 | amyloid fibril formation                                                               | 15        | 5           | 0.85     | 1.10E-03 | 1.47E-02 |
| GO:0019220 | regulation of phosphate metabolic process                                              | 1562      | 117         | 88.93    | 1.10E-03 | 1.47E-02 |
| GO:0010324 | membrane invagination                                                                  | 56        | 10          | 3.19     | 1.11E-03 | 1.49E-02 |
| GO:0033622 | integrin activation                                                                    | 22        | 6           | 1.25     | 1.14E-03 | 1.52E-02 |
| GO:0042255 | ribosome assembly                                                                      | 22        | 6           | 1.25     | 1.14E-03 | 1.52E-02 |
| GO:0051174 | regulation of phosphorus metabolic process                                             | 1564      | 117         | 89.04    | 1.15E-03 | 1.53E-02 |
| GO:0019674 | NAD metabolic process                                                                  | 66        | 11          | 3.76     | 1.16E-03 | 1.54E-02 |
| GO:1900024 | regulation of substrate adhesion-dependent cell spreading                              | 47        | 9           | 2.68     | 1.16E-03 | 1.54E-02 |
| GO:0000413 | protein peptidyl-prolyl isomerization                                                  | 30        | 7           | 1.71     | 1.22E-03 | 1.62E-02 |
| GO:0032435 | negative regulation of proteasomal ubiquitin-dependent protein catabolic process       | 30        | 7           | 1.71     | 1.22E-03 | 1.62E-02 |
| GO:0006888 | ER to Golgi vesicle-mediated transport                                                 | 166       | 20          | 9.45     | 1.22E-03 | 1.62E-02 |
| GO:0032434 | regulation of proteasomal ubiquitin-dependent protein catabolic process                | 98        | 14          | 5.58     | 1.27E-03 | 1.68E-02 |
| GO:0032392 | DNA geometric change                                                                   | 77        | 12          | 4.38     | 1.29E-03 | 1.71E-02 |
| GO:0006839 | mitochondrial transport                                                                | 191       | 22          | 10.87    | 1.30E-03 | 1.72E-02 |
| GO:1903201 | regulation of oxidative stress-induced cell death                                      | 67        | 11          | 3.81     | 1.31E-03 | 1.73E-02 |
| GO:0044344 | cellular response to fibroblast growth factor stimulus                                 | 132       | 17          | 7.51     | 1.34E-03 | 1.77E-02 |
| GO:0035036 | sperm-egg recognition                                                                  | 48        | 9           | 2.73     | 1.36E-03 | 1.78E-02 |
| GO:1901799 | negative regulation of proteasomal protein catabolic process                           | 48        | 9           | 2.73     | 1.36E-03 | 1.78E-02 |
| GO:0007584 | response to nutrient                                                                   | 204       | 23          | 11.61    | 1.36E-03 | 1.78E-02 |
| GO:2001236 | regulation of extrinsic apoptotic signaling pathway                                    | 144       | 18          | 8.2      | 1.38E-03 | 1.81E-02 |
| GO:0010646 | regulation of cell communication                                                       | 3358      | 228         | 191.18   | 1.39E-03 | 1.82E-02 |
| GO:0006289 | nucleotide-excision repair                                                             | 99        | 14          | 5.64     | 1.41E-03 | 1.84E-02 |
| GO:0010038 | response to metal ion                                                                  | 320       | 32          | 18.22    | 1.41E-03 | 1.84E-02 |
| GO:0099131 | ATP hydrolysis coupled ion transmembrane transport                                     | 23        | 6           | 1.31     | 1.46E-03 | 1.90E-02 |
| GO:0098662 | inorganic cation transmembrane transport                                               | 583       | 51          | 33.19    | 1.49E-03 | 1.93E-02 |
| GO:0032801 | receptor catabolic process                                                             | 31        | 7           | 1.76     | 1.49E-03 | 1.93E-02 |
| GO:0035088 | establishment or maintenance of apical/basal cell polarity                             | 31        | 7           | 1.76     | 1.49E-03 | 1.93E-02 |
| GO:0061245 | establishment or maintenance of bipolar cell polarity                                  | 31        | 7           | 1.76     | 1.49E-03 | 1.93E-02 |
| GO:0010557 | positive regulation of macromolecule biosynthetic process                              | 1607      | 119         | 91.49    | 1.50E-03 | 1.95E-02 |
| GO:0051049 | regulation of transport                                                                | 1670      | 123         | 95.08    | 1.52E-03 | 1.97E-02 |
| GO:0051444 | negative regulation of ubiquitin-protein transferase activity                          | 16        | 5           | 0.91     | 1.52E-03 | 1.97E-02 |
| GO:1901617 | organic hydroxy compound biosynthetic process                                          | 231       | 25          | 13.15    | 1.54E-03 | 1.99E-02 |
| GO:0010639 | negative regulation of organelle organization                                          | 322       | 32          | 18.33    | 1.56E-03 | 2.01E-02 |
| GO:0007566 | embryo implantation                                                                    | 49        | 9           | 2.79     | 1.58E-03 | 2.04E-02 |
| GO:0006396 | RNA processing                                                                         | 1102      | 86          | 62.74    | 1.63E-03 | 2.10E-02 |
| GO:0006066 | alcohol metabolic process                                                              | 323       | 32          | 18.39    | 1.64E-03 | 2.11E-02 |
| GO:0009162 | deoxyribonucleoside monophosphate metabolic process                                    | 10        | 4           | 0.57     | 1.66E-03 | 2.12E-02 |
| GO:0019042 | viral latency                                                                          | 10        | 4           | 0.57     | 1.66E-03 | 2.12E-02 |
| GO:0019321 | pentose metabolic process                                                              | 10        | 4           | 0.57     | 1.66E-03 | 2.12E-02 |
| GO:0032070 | regulation of deoxyribonuclease activity                                               | 10        | 4           | 0.57     | 1.66E-03 | 2.12E-02 |
| GO:0035646 | endosome to melanosome transport                                                       | 10        | 4           | 0.57     | 1.66E-03 | 2.12E-02 |
| GO:0043485 | endosome to pigment granule transport                                                  | 10        | 4           | 0.57     | 1.66E-03 | 2.12E-02 |
| GO:0048757 | pigment granule maturation                                                             | 10        | 4           | 0.57     | 1.66E-03 | 2.12E-02 |
| GO:0060315 | negative regulation of ryanodine-sensitive calcium-release channel activity            | 10        | 4           | 0.57     | 1.66E-03 | 2.12E-02 |
| GO:0006801 | superoxide metabolic process                                                           | 59        | 10          | 3.36     | 1.68E-03 | 2.13E-02 |
| GO:0032418 | lysosome localization                                                                  | 59        | 10          | 3.36     | 1.68E-03 | 2.13E-02 |
| GO:0140029 | exocytic process                                                                       | 59        | 10          | 3.36     | 1.68E-03 | 2.13E-02 |
| GO:0007021 | tubulin complex assembly                                                               | 5         | 3           | 0.28     | 1.69E-03 | 2.13E-02 |
| GO:0010572 | positive regulation of platelet activation                                             | 5         | 3           | 0.28     | 1.69E-03 | 2.13E-02 |
| GO:0031536 | positive regulation of exit from mitosis                                               | 5         | 3           | 0.28     | 1.69E-03 | 2.13E-02 |
| GO:0044501 | modulation of signal transduction in other organism                                    | 5         | 3           | 0.28     | 1.69E-03 | 2.13E-02 |
| GO:0052250 | modulation of signal transduction in other organism involved in symbiotic interaction  | 5         | 3           | 0.28     | 1.69E-03 | 2.13E-02 |
| GO:1902177 | positive regulation of oxidative stress-induced intrinsic apoptotic signaling pathway  | 5         | 3           | 0.28     | 1.69E-03 | 2.13E-02 |
| GO:0051101 | regulation of DNA binding                                                              | 112       | 15          | 6.38     | 1.69E-03 | 2.13E-02 |
| GO:0009725 | response to hormone                                                                    | 880       | 71          | 50.1     | 1.78E-03 | 2.24E-02 |
| GO:0070647 | protein modification by small protein conjugation or removal                           | 970       | 77          | 55.22    | 1.80E-03 | 2.26E-02 |
| GO:0051656 | establishment of organelle localization                                                | 420       | 39          | 23.91    | 1.82E-03 | 2.28E-02 |
| GO:0010823 | negative regulation of mitochondrion organization                                      | 50        | 9           | 2.85     | 1.83E-03 | 2.29E-02 |
| GO:0045807 | positive regulation of endocytosis                                                     | 136       | 17          | 7.74     | 1.85E-03 | 2.32E-02 |
| GO:0000303 | response to superoxide                                                                 | 24        | 6           | 1.37     | 1.86E-03 | 2.32E-02 |
| GO:0090662 | ATP hydrolysis coupled transmembrane transport                                         | 24        | 6           | 1.37     | 1.86E-03 | 2.32E-02 |
| GO:1902410 | mitotic cytokinetic process                                                            | 24        | 6           | 1.37     | 1.86E-03 | 2.32E-02 |
| GO:0016050 | vesicle organization                                                                   | 260       | 27          | 14.8     | 1.88E-03 | 2.34E-02 |
| GO:0033143 | regulation of intracellular steroid hormone receptor signaling pathway                 | 70        | 11          | 3.99     | 1.89E-03 | 2.35E-02 |

Supplementary Table S2A: Significant gene ontology categories for expressed genes in MKs

| GO.ID      | Term                                                                                                    | Annotated | Significant | Expected | pval     | qval     |
|------------|---------------------------------------------------------------------------------------------------------|-----------|-------------|----------|----------|----------|
| GO:0002437 | inflammatory response to antigenic stimulus                                                             | 41        | 8           | 2.33     | 1.91E-03 | 2.37E-02 |
| GO:0036498 | IRE1-mediated unfolded protein response                                                                 | 60        | 10          | 3.42     | 1.91E-03 | 2.37E-02 |
| GO:0002009 | morphogenesis of an epithelium                                                                          | 506       | 45          | 28.81    | 2.01E-03 | 2.49E-02 |
| GO:0033138 | positive regulation of peptidyl-serine phosphorylation                                                  | 81        | 12          | 4.61     | 2.02E-03 | 2.50E-02 |
| GO:0001101 | response to acid chemical                                                                               | 314       | 31          | 17.88    | 2.03E-03 | 2.51E-02 |
| GO:0043555 | regulation of translation in response to stress                                                         | 17        | 5           | 0.97     | 2.06E-03 | 2.54E-02 |
| GO:0045947 | negative regulation of translational initiation                                                         | 17        | 5           | 0.97     | 2.06E-03 | 2.54E-02 |
| GO:0048025 | negative regulation of mRNA splicing, via spliceosome                                                   | 17        | 5           | 0.97     | 2.06E-03 | 2.54E-02 |
| GO:1902165 | regulation of intrinsic apoptotic signaling pathway in response to DNA damage by p53 class mediator     | 17        | 5           | 0.97     | 2.06E-03 | 2.54E-02 |
| GO:0030218 | erythrocyte differentiation                                                                             | 103       | 14          | 5.86     | 2.07E-03 | 2.55E-02 |
| GO:0048545 | response to steroid hormone                                                                             | 355       | 34          | 20.21    | 2.10E-03 | 2.58E-02 |
| GO:0071902 | positive regulation of protein serine/threonine kinase activity                                         | 302       | 30          | 17.19    | 2.16E-03 | 2.65E-02 |
| GO:0071774 | response to fibroblast growth factor                                                                    | 138       | 17          | 7.86     | 2.17E-03 | 2.66E-02 |
| GO:0006487 | protein N-linked glycosylation                                                                          | 61        | 10          | 3.47     | 2.17E-03 | 2.66E-02 |
| GO:0006007 | glucose catabolic process                                                                               | 33        | 7           | 1.88     | 2.20E-03 | 2.68E-02 |
| GO:0061077 | chaperone-mediated protein folding                                                                      | 33        | 7           | 1.88     | 2.20E-03 | 2.68E-02 |
| GO:0072665 | protein localization to vacuole                                                                         | 33        | 7           | 1.88     | 2.20E-03 | 2.68E-02 |
| GO:0090322 | regulation of superoxide metabolic process                                                              | 33        | 7           | 1.88     | 2.20E-03 | 2.68E-02 |
| GO:1901030 | positive regulation of mitochondrial outer membrane permeabilization involved in apoptotic signaling... | 33        | 7           | 1.88     | 2.20E-03 | 2.68E-02 |
| GO:0009891 | positive regulation of biosynthetic process                                                             | 1735      | 126         | 98.78    | 2.21E-03 | 2.69E-02 |
| GO:0030834 | regulation of actin filament depolymerization                                                           | 42        | 8           | 2.39     | 2.24E-03 | 2.72E-02 |
| GO:0016567 | protein ubiquitination                                                                                  | 740       | 61          | 42.13    | 2.25E-03 | 2.73E-02 |
| GO:0071417 | cellular response to organonitrogen compound                                                            | 538       | 47          | 30.63    | 2.30E-03 | 2.79E-02 |
| GO:0070997 | neuron death                                                                                            | 330       | 32          | 18.79    | 2.31E-03 | 2.80E-02 |
| GO:2001020 | regulation of response to DNA damage stimulus                                                           | 175       | 20          | 9.96     | 2.32E-03 | 2.81E-02 |
| GO:0000305 | response to oxygen radical                                                                              | 25        | 6           | 1.42     | 2.33E-03 | 2.81E-02 |
| GO:0050686 | negative regulation of mRNA processing                                                                  | 25        | 6           | 1.42     | 2.33E-03 | 2.81E-02 |
| GO:0060765 | regulation of androgen receptor signaling pathway                                                       | 25        | 6           | 1.42     | 2.33E-03 | 2.81E-02 |
| GO:1900739 | regulation of protein insertion into mitochondrial membrane involved in apoptotic signaling pathway     | 25        | 6           | 1.42     | 2.33E-03 | 2.81E-02 |
| GO:1900740 | positive regulation of protein insertion into mitochondrial membrane involved in apoptotic signaling... | 25        | 6           | 1.42     | 2.33E-03 | 2.81E-02 |
| GO:0031328 | positive regulation of cellular biosynthetic process                                                    | 1707      | 124         | 97.18    | 2.37E-03 | 2.85E-02 |
| GO:0031100 | animal organ regeneration                                                                               | 72        | 11          | 4.1      | 2.39E-03 | 2.87E-02 |
| GO:0048678 | response to axon injury                                                                                 | 72        | 11          | 4.1      | 2.39E-03 | 2.87E-02 |
| GO:0072332 | intrinsic apoptotic signaling pathway by p53 class mediator                                             | 72        | 11          | 4.1      | 2.39E-03 | 2.87E-02 |
| GO:0006469 | negative regulation of protein kinase activity                                                          | 213       | 23          | 12.13    | 2.40E-03 | 2.87E-02 |
| GO:0033993 | response to lipid                                                                                       | 846       | 68          | 48.16    | 2.43E-03 | 2.90E-02 |
| GO:0006879 | cellular iron ion homeostasis                                                                           | 52        | 9           | 2.96     | 2.43E-03 | 2.90E-02 |
| GO:1903312 | negative regulation of mRNA metabolic process                                                           | 62        | 10          | 3.53     | 2.46E-03 | 2.94E-02 |
| GO:0043436 | oxoacid metabolic process                                                                               | 1027      | 80          | 58.47    | 2.47E-03 | 2.95E-02 |
| GO:0000041 | transition metal ion transport                                                                          | 83        | 12          | 4.73     | 2.49E-03 | 2.95E-02 |
| GO:0030901 | midbrain development                                                                                    | 83        | 12          | 4.73     | 2.49E-03 | 2.95E-02 |
| GO:0031532 | actin cytoskeleton reorganization                                                                       | 83        | 12          | 4.73     | 2.49E-03 | 2.95E-02 |
| GO:0002679 | respiratory burst involved in defense response                                                          | 11        | 4           | 0.63     | 2.49E-03 | 2.95E-02 |
| GO:0043476 | pigment accumulation                                                                                    | 11        | 4           | 0.63     | 2.49E-03 | 2.95E-02 |
| GO:0043482 | cellular pigment accumulation                                                                           | 11        | 4           | 0.63     | 2.49E-03 | 2.95E-02 |
| GO:0090151 | establishment of protein localization to mitochondrial membrane                                         | 11        | 4           | 0.63     | 2.49E-03 | 2.95E-02 |
| GO:0007044 | cell-substrate junction assembly                                                                        | 94        | 13          | 5.35     | 2.52E-03 | 2.98E-02 |
| GO:0006082 | organic acid metabolic process                                                                          | 1043      | 81          | 59.38    | 2.52E-03 | 2.98E-02 |
| GO:0006464 | cellular protein modification process                                                                   | 3563      | 238         | 202.85   | 2.56E-03 | 3.02E-02 |
| GO:0036211 | protein modification process                                                                            | 3563      | 238         | 202.85   | 2.56E-03 | 3.02E-02 |
| GO:1990090 | cellular response to nerve growth factor stimulus                                                       | 43        | 8           | 2.45     | 2.62E-03 | 3.08E-02 |
| GO:1900026 | positive regulation of substrate adhesion-dependent cell spreading                                      | 34        | 7           | 1.94     | 2.63E-03 | 3.09E-02 |
| GO:0033157 | regulation of intracellular protein transport                                                           | 202       | 22          | 11.5     | 2.65E-03 | 3.11E-02 |
| GO:0071214 | cellular response to abiotic stimulus                                                                   | 293       | 29          | 16.68    | 2.68E-03 | 3.14E-02 |
| GO:0104004 | cellular response to environmental stimulus                                                             | 293       | 29          | 16.68    | 2.68E-03 | 3.14E-02 |
| GO:0030220 | platelet formation                                                                                      | 18        | 5           | 1.02     | 2.72E-03 | 3.17E-02 |
| GO:0032516 | positive regulation of phosphoprotein phosphatase activity                                              | 18        | 5           | 1.02     | 2.72E-03 | 3.17E-02 |
| GO:0036344 | platelet morphogenesis                                                                                  | 18        | 5           | 1.02     | 2.72E-03 | 3.17E-02 |
| GO:0042276 | error-prone translesion synthesis                                                                       | 18        | 5           | 1.02     | 2.72E-03 | 3.17E-02 |
| GO:0071243 | cellular response to arsenic-containing substance                                                       | 18        | 5           | 1.02     | 2.72E-03 | 3.17E-02 |
| GO:0010810 | regulation of cell-substrate adhesion                                                                   | 190       | 21          | 10.82    | 2.75E-03 | 3.20E-02 |
| GO:2001237 | negative regulation of extrinsic apoptotic signaling pathway                                            | 95        | 13          | 5.41     | 2.77E-03 | 3.22E-02 |
| GO:0097191 | extrinsic apoptotic signaling pathway                                                                   | 203       | 22          | 11.56    | 2.82E-03 | 3.28E-02 |
| GO:0015949 | nucleobase-containing small molecule interconversion                                                    | 26        | 6           | 1.48     | 2.89E-03 | 3.36E-02 |
| GO:0030193 | regulation of blood coagulation                                                                         | 74        | 11          | 4.21     | 2.98E-03 | 3.46E-02 |
| GO:0051052 | regulation of DNA metabolic process                                                                     | 363       | 34          | 20.67    | 3.02E-03 | 3.49E-02 |
| GO:0007179 | transforming growth factor beta receptor signaling pathway                                              | 179       | 20          | 10.19    | 3.02E-03 | 3.49E-02 |
| GO:0034383 | low-density lipoprotein particle clearance                                                              | 44        | 8           | 2.5      | 3.04E-03 | 3.51E-02 |
| GO:0046364 | monosaccharide biosynthetic process                                                                     | 85        | 12          | 4.84     | 3.05E-03 | 3.52E-02 |
| GO:1904029 | regulation of cyclin-dependent protein kinase activity                                                  | 85        | 12          | 4.84     | 3.05E-03 | 3.52E-02 |
| GO:0050900 | leukocyte migration                                                                                     | 391       | 36          | 22.26    | 3.08E-03 | 3.55E-02 |
| GO:0045860 | positive regulation of protein kinase activity                                                          | 475       | 42          | 27.04    | 3.09E-03 | 3.56E-02 |
| GO:0015682 | ferric iron transport                                                                                   | 35        | 7           | 1.99     | 3.13E-03 | 3.59E-02 |
| GO:0033572 | transferrin transport                                                                                   | 35        | 7           | 1.99     | 3.13E-03 | 3.59E-02 |
| GO:0051973 | positive regulation of telomerase activity                                                              | 35        | 7           | 1.99     | 3.13E-03 | 3.59E-02 |
| GO:0072512 | trivalent inorganic cation transport                                                                    | 35        | 7           | 1.99     | 3.13E-03 | 3.59E-02 |
| GO:0006620 | posttranslational protein targeting to endoplasmic reticulum membrane                                   | 6         | 3           | 0.34     | 3.23E-03 | 3.68E-02 |
| GO:0032415 | regulation of sodium:proton antiporter activity                                                         | 6         | 3           | 0.34     | 3.23E-03 | 3.68E-02 |
| GO:0034112 | positive regulation of homotypic cell-cell adhesion                                                     | 6         | 3           | 0.34     | 3.23E-03 | 3.68E-02 |
| GO:1902416 | positive regulation of mRNA binding                                                                     | 6         | 3           | 0.34     | 3.23E-03 | 3.68E-02 |

Supplementary Table S2A: Significant gene ontology categories for expressed genes in MKs

| GO.ID      | Term                                                                                | Annotated | Significant | Expected | pval     | qval     |
|------------|-------------------------------------------------------------------------------------|-----------|-------------|----------|----------|----------|
| GO:1905323 | telomerase holoenzyme complex assembly                                              | 6         | 3           | 0.34     | 3.23E-03 | 3.68E-02 |
| GO:1905475 | regulation of protein localization to membrane                                      | 168       | 19          | 9.56     | 3.31E-03 | 3.76E-02 |
| GO:0051279 | regulation of release of sequestered calcium ion into cytosol                       | 75        | 11          | 4.27     | 3.31E-03 | 3.76E-02 |
| GO:1900046 | regulation of hemostasis                                                            | 75        | 11          | 4.27     | 3.31E-03 | 3.76E-02 |
| GO:0098655 | cation transmembrane transport                                                      | 665       | 55          | 37.86    | 3.39E-03 | 3.85E-02 |
| GO:0048513 | animal organ development                                                            | 3201      | 215         | 182.24   | 3.39E-03 | 3.85E-02 |
| GO:0050867 | positive regulation of cell activation                                              | 298       | 29          | 16.97    | 3.43E-03 | 3.88E-02 |
| GO:0033673 | negative regulation of kinase activity                                              | 232       | 24          | 13.21    | 3.43E-03 | 3.88E-02 |
| GO:0006520 | cellular amino acid metabolic process                                               | 325       | 31          | 18.5     | 3.43E-03 | 3.88E-02 |
| GO:0019430 | removal of superoxide radicals                                                      | 19        | 5           | 1.08     | 3.52E-03 | 3.97E-02 |
| GO:0030042 | actin filament depolymerization                                                     | 45        | 8           | 2.56     | 3.52E-03 | 3.97E-02 |
| GO:0006739 | NADP metabolic process                                                              | 27        | 6           | 1.54     | 3.53E-03 | 3.97E-02 |
| GO:0045197 | establishment or maintenance of epithelial cell apical/basal polarity               | 27        | 6           | 1.54     | 3.53E-03 | 3.97E-02 |
| GO:0051385 | response to mineralocorticoid                                                       | 27        | 6           | 1.54     | 3.53E-03 | 3.97E-02 |
| GO:0005513 | detection of calcium ion                                                            | 12        | 4           | 0.68     | 3.57E-03 | 4.00E-02 |
| GO:0006595 | polyamine metabolic process                                                         | 12        | 4           | 0.68     | 3.57E-03 | 4.00E-02 |
| GO:0051238 | sequestering of metal ion                                                           | 12        | 4           | 0.68     | 3.57E-03 | 4.00E-02 |
| GO:0051645 | Golgi localization                                                                  | 12        | 4           | 0.68     | 3.57E-03 | 4.00E-02 |
| GO:0007160 | cell-matrix adhesion                                                                | 207       | 22          | 11.78    | 3.58E-03 | 4.01E-02 |
| GO:0002694 | regulation of leukocyte activation                                                  | 465       | 41          | 26.47    | 3.62E-03 | 4.05E-02 |
| GO:1901654 | response to ketone                                                                  | 182       | 20          | 10.36    | 3.66E-03 | 4.09E-02 |
| GO:0045652 | regulation of megakaryocyte differentiation                                         | 76        | 11          | 4.33     | 3.68E-03 | 4.10E-02 |
| GO:1905897 | regulation of response to endoplasmic reticulum stress                              | 76        | 11          | 4.33     | 3.68E-03 | 4.10E-02 |
| GO:0042769 | DNA damage response, detection of DNA damage                                        | 36        | 7           | 2.05     | 3.70E-03 | 4.10E-02 |
| GO:0043403 | skeletal muscle tissue regeneration                                                 | 36        | 7           | 2.05     | 3.70E-03 | 4.10E-02 |
| GO:0048488 | synaptic vesicle endocytosis                                                        | 36        | 7           | 2.05     | 3.70E-03 | 4.10E-02 |
| GO:0140238 | presynaptic endocytosis                                                             | 36        | 7           | 2.05     | 3.70E-03 | 4.10E-02 |
| GO:1905521 | regulation of macrophage migration                                                  | 36        | 7           | 2.05     | 3.70E-03 | 4.10E-02 |
| GO:0044087 | regulation of cellular component biogenesis                                         | 817       | 65          | 46.51    | 3.80E-03 | 4.21E-02 |
| GO:0007569 | cell aging                                                                          | 110       | 14          | 6.26     | 3.82E-03 | 4.23E-02 |
| GO:0006281 | DNA repair                                                                          | 453       | 40          | 25.79    | 3.92E-03 | 4.33E-02 |
| GO:1901983 | regulation of protein acetylation                                                   | 66        | 10          | 3.76     | 3.94E-03 | 4.35E-02 |
| GO:0071496 | cellular response to external stimulus                                              | 301       | 29          | 17.14    | 3.95E-03 | 4.36E-02 |
| GO:0001932 | regulation of protein phosphorylation                                               | 1246      | 93          | 70.94    | 3.97E-03 | 4.38E-02 |
| GO:0006415 | translational termination                                                           | 99        | 13          | 5.64     | 3.98E-03 | 4.38E-02 |
| GO:0043270 | positive regulation of ion transport                                                | 248       | 25          | 14.12    | 4.02E-03 | 4.42E-02 |
| GO:0000731 | DNA synthesis involved in DNA repair                                                | 46        | 8           | 2.62     | 4.05E-03 | 4.45E-02 |
| GO:1990089 | response to nerve growth factor                                                     | 46        | 8           | 2.62     | 4.05E-03 | 4.45E-02 |
| GO:1900407 | regulation of cellular response to oxidative stress                                 | 77        | 11          | 4.38     | 4.08E-03 | 4.48E-02 |
| GO:1903749 | positive regulation of establishment of protein localization to mitochondrion       | 56        | 9           | 3.19     | 4.09E-03 | 4.48E-02 |
| GO:0010256 | endomembrane system organization                                                    | 343       | 32          | 19.53    | 4.17E-03 | 4.57E-02 |
| GO:0007050 | cell cycle arrest                                                                   | 223       | 23          | 12.7     | 4.27E-03 | 4.67E-02 |
| GO:0019985 | translesion synthesis                                                               | 37        | 7           | 2.11     | 4.35E-03 | 4.75E-02 |
| GO:1903146 | regulation of autophagy of mitochondrion                                            | 37        | 7           | 2.11     | 4.35E-03 | 4.75E-02 |
| GO:0009988 | cell-cell recognition                                                               | 67        | 10          | 3.81     | 4.40E-03 | 4.80E-02 |
| GO:0008630 | intrinsic apoptotic signaling pathway in response to DNA damage                     | 89        | 12          | 5.07     | 4.48E-03 | 4.87E-02 |
| GO:0000717 | nucleotide-excision repair, DNA duplex unwinding                                    | 20        | 5           | 1.14     | 4.48E-03 | 4.87E-02 |
| GO:0010801 | negative regulation of peptidyl-threonine phosphorylation                           | 20        | 5           | 1.14     | 4.48E-03 | 4.87E-02 |
| GO:0032986 | protein-DNA complex disassembly                                                     | 20        | 5           | 1.14     | 4.48E-03 | 4.87E-02 |
| GO:1903322 | positive regulation of protein modification by small protein conjugation or removal | 112       | 14          | 6.38     | 4.50E-03 | 4.88E-02 |
| GO:0050818 | regulation of coagulation                                                           | 78        | 11          | 4.44     | 4.51E-03 | 4.89E-02 |
| GO:0030705 | cytoskeleton-dependent intracellular transport                                      | 148       | 17          | 8.43     | 4.52E-03 | 4.89E-02 |
| GO:0042325 | regulation of phosphorylation                                                       | 1377      | 101         | 78.39    | 4.56E-03 | 4.93E-02 |
| GO:0051291 | protein heterooligomerization                                                       | 124       | 15          | 7.06     | 4.57E-03 | 4.94E-02 |
| GO:0098660 | inorganic ion transmembrane transport                                               | 660       | 54          | 37.57    | 4.58E-03 | 4.95E-02 |

Supplementary Table S2B: Significant gene ontology categories for expressed genes in platelets

| GO.ID      | Term                                                | Annotated | Significant | Expected | pval     | qual     |
|------------|-----------------------------------------------------|-----------|-------------|----------|----------|----------|
| GO:0045055 | regulated exocytosis                                | 724       | 86          | 20.06    | 1.00E-30 | 5.48E-27 |
| GO:0006887 | exocytosis                                          | 809       | 90          | 22.42    | 1.00E-30 | 5.48E-27 |
| GO:0016192 | vesicle-mediated transport                          | 1728      | 135         | 47.89    | 1.50E-30 | 5.48E-27 |
| GO:0051179 | localization                                        | 5680      | 260         | 157.41   | 6.60E-24 | 1.81E-20 |
| GO:0006810 | transport                                           | 4395      | 220         | 121.8    | 8.50E-24 | 1.86E-20 |
| GO:0051234 | establishment of localization                       | 4501      | 223         | 124.74   | 1.30E-23 | 2.37E-20 |
| GO:0001775 | cell activation                                     | 1268      | 102         | 35.14    | 1.70E-23 | 2.66E-20 |
| GO:0002576 | platelet degranulation                              | 118       | 31          | 3.27     | 5.50E-22 | 7.53E-19 |
| GO:0042060 | wound healing                                       | 522       | 61          | 14.47    | 6.50E-22 | 7.91E-19 |
| GO:0009611 | response to wounding                                | 630       | 66          | 17.46    | 4.70E-21 | 5.15E-18 |
| GO:0046903 | secretion                                           | 1493      | 107         | 41.38    | 9.40E-21 | 9.36E-18 |
| GO:0032940 | secretion by cell                                   | 1368      | 101         | 37.91    | 1.80E-20 | 1.64E-17 |
| GO:0007596 | blood coagulation                                   | 317       | 45          | 8.79     | 1.10E-19 | 9.27E-17 |
| GO:0007599 | hemostasis                                          | 321       | 45          | 8.9      | 1.80E-19 | 1.41E-16 |
| GO:0050817 | coagulation                                         | 322       | 45          | 8.92     | 2.10E-19 | 1.53E-16 |
| GO:0002446 | neutrophil mediated immunity                        | 475       | 54          | 13.16    | 6.50E-19 | 4.19E-16 |
| GO:0042119 | neutrophil activation                               | 475       | 54          | 13.16    | 6.50E-19 | 4.19E-16 |
| GO:0043312 | neutrophil degranulation                            | 461       | 53          | 12.78    | 8.50E-19 | 5.18E-16 |
| GO:0002283 | neutrophil activation involved in immune response   | 464       | 53          | 12.86    | 1.10E-18 | 6.34E-16 |
| GO:0036230 | granulocyte activation                              | 482       | 54          | 13.36    | 1.30E-18 | 7.12E-16 |
| GO:0002274 | myeloid leukocyte activation                        | 618       | 61          | 17.13    | 3.30E-18 | 1.72E-15 |
| GO:0002444 | myeloid leukocyte mediated immunity                 | 522       | 55          | 14.47    | 9.60E-18 | 4.76E-15 |
| GO:0043299 | leukocyte degranulation                             | 505       | 54          | 14       | 1.00E-17 | 4.76E-15 |
| GO:0070527 | platelet aggregation                                | 56        | 20          | 1.55     | 1.50E-17 | 6.85E-15 |
| GO:0002275 | myeloid cell activation involved in immune response | 515       | 54          | 14.27    | 2.40E-17 | 1.05E-14 |
| GO:0030168 | platelet activation                                 | 145       | 29          | 4.02     | 3.90E-17 | 1.64E-14 |
| GO:0051641 | cellular localization                               | 2356      | 131         | 65.29    | 4.30E-16 | 1.75E-13 |
| GO:0034109 | homotypic cell-cell adhesion                        | 74        | 21          | 2.05     | 4.80E-16 | 1.88E-13 |
| GO:0002376 | immune system process                               | 2684      | 142         | 74.38    | 9.80E-16 | 3.70E-13 |
| GO:0050878 | regulation of body fluid levels                     | 475       | 49          | 13.16    | 1.60E-15 | 5.84E-13 |
| GO:0002263 | cell activation involved in immune response         | 651       | 58          | 18.04    | 2.60E-15 | 9.19E-13 |
| GO:0002443 | leukocyte mediated immunity                         | 713       | 61          | 19.76    | 2.90E-15 | 9.93E-13 |
| GO:0002366 | leukocyte activation involved in immune response    | 648       | 57          | 17.96    | 8.00E-15 | 2.66E-12 |
| GO:0045321 | leukocyte activation                                | 1122      | 78          | 31.09    | 2.60E-14 | 8.38E-12 |
| GO:0002252 | immune effector process                             | 1076      | 75          | 29.82    | 7.80E-14 | 2.44E-11 |
| GO:0034613 | cellular protein localization                       | 1442      | 90          | 39.96    | 1.10E-13 | 3.35E-11 |
| GO:0070727 | cellular macromolecule localization                 | 1449      | 90          | 40.16    | 1.40E-13 | 4.15E-11 |
| GO:0008104 | protein localization                                | 2265      | 121         | 62.77    | 1.70E-13 | 4.90E-11 |
| GO:0033036 | macromolecule localization                          | 2563      | 131         | 71.03    | 3.10E-13 | 8.71E-11 |
| GO:0065008 | regulation of biological quality                    | 3417      | 160         | 94.7     | 3.80E-13 | 1.04E-10 |
| GO:0044419 | interspecies interaction between organisms          | 873       | 64          | 24.19    | 7.50E-13 | 2.00E-10 |
| GO:0098657 | import into cell                                    | 660       | 54          | 18.29    | 8.20E-13 | 2.14E-10 |
| GO:0044403 | symbiont process                                    | 831       | 62          | 23.03    | 8.40E-13 | 2.14E-10 |
| GO:0046907 | intracellular transport                             | 1421      | 87          | 39.38    | 9.10E-13 | 2.27E-10 |
| GO:0006897 | endocytosis                                         | 586       | 50          | 16.24    | 1.30E-12 | 3.17E-10 |
| GO:0072657 | protein localization to membrane                    | 511       | 46          | 14.16    | 1.70E-12 | 4.05E-10 |
| GO:0009056 | catabolic process                                   | 2172      | 114         | 60.19    | 3.70E-12 | 8.63E-10 |
| GO:0051649 | establishment of localization in cell               | 1773      | 99          | 49.14    | 4.40E-12 | 1.00E-09 |
| GO:0044248 | cellular catabolic process                          | 1926      | 104         | 53.38    | 8.30E-12 | 1.86E-09 |
| GO:0006413 | translational initiation                            | 170       | 25          | 4.71     | 8.50E-12 | 1.86E-09 |
| GO:0022607 | cellular component assembly                         | 2516      | 125         | 69.73    | 1.00E-11 | 2.15E-09 |
| GO:0050896 | response to stimulus                                | 7976      | 290         | 221.04   | 1.40E-11 | 2.95E-09 |
| GO:0016032 | viral process                                       | 772       | 56          | 21.39    | 3.70E-11 | 7.65E-09 |
| GO:0044085 | cellular component biogenesis                       | 2682      | 129         | 74.33    | 4.00E-11 | 8.12E-09 |
| GO:0090150 | establishment of protein localization to membrane   | 262       | 30          | 7.26     | 4.60E-11 | 9.17E-09 |
| GO:0070887 | cellular response to chemical stimulus              | 2925      | 137         | 81.06    | 4.90E-11 | 9.59E-09 |
| GO:0006955 | immune response                                     | 1823      | 98          | 50.52    | 5.20E-11 | 1.00E-08 |
| GO:0051128 | regulation of cellular component organization       | 2181      | 111         | 60.44    | 5.50E-11 | 1.04E-08 |
| GO:0032879 | regulation of localization                          | 2500      | 122         | 69.28    | 6.70E-11 | 1.24E-08 |
| GO:0033365 | protein localization to organelle                   | 742       | 54          | 20.56    | 7.50E-11 | 1.37E-08 |
| GO:0071702 | organic substance transport                         | 2270      | 113         | 62.91    | 1.40E-10 | 2.47E-08 |
| GO:0071840 | cellular component organization or biogenesis       | 5415      | 214         | 150.07   | 1.40E-10 | 2.47E-08 |
| GO:0016043 | cellular component organization                     | 5288      | 210         | 146.55   | 1.60E-10 | 2.78E-08 |
| GO:0072594 | establishment of protein localization to organelle  | 423       | 38          | 11.72    | 1.80E-10 | 3.08E-08 |
| GO:0070972 | protein localization to endoplasmic reticulum       | 117       | 19          | 3.24     | 5.00E-10 | 8.43E-08 |
| GO:0050790 | regulation of catalytic activity                    | 1987      | 101         | 55.07    | 5.80E-10 | 9.63E-08 |
| GO:0071705 | nitrogen compound transport                         | 1907      | 98          | 52.85    | 6.30E-10 | 1.03E-07 |
| GO:0045184 | establishment of protein localization               | 1691      | 90          | 46.86    | 6.70E-10 | 1.08E-07 |
| GO:1901575 | organic substance catabolic process                 | 1800      | 94          | 49.88    | 6.80E-10 | 1.08E-07 |
| GO:0006950 | response to stress                                  | 3494      | 152         | 96.83    | 6.90E-10 | 1.08E-07 |
| GO:0030036 | actin cytoskeleton organization                     | 526       | 42          | 14.58    | 7.30E-10 | 1.13E-07 |
| GO:0051716 | cellular response to stimulus                       | 6378      | 239         | 176.76   | 9.30E-10 | 1.42E-07 |
| GO:0042886 | amide transport                                     | 1649      | 88          | 45.7     | 9.50E-10 | 1.43E-07 |
| GO:0009057 | macromolecule catabolic process                     | 1136      | 68          | 31.48    | 1.10E-09 | 1.63E-07 |
| GO:0045047 | protein targeting to ER                             | 97        | 17          | 2.69     | 1.20E-09 | 1.75E-07 |
| GO:0006605 | protein targeting                                   | 337       | 32          | 9.34     | 1.30E-09 | 1.87E-07 |
| GO:0006996 | organelle organization                              | 3069      | 137         | 85.05    | 1.40E-09 | 1.99E-07 |
| GO:0060341 | regulation of cellular localization                 | 807       | 54          | 22.36    | 1.60E-09 | 2.25E-07 |
| GO:0015031 | protein transport                                   | 1589      | 85          | 44.04    | 1.80E-09 | 2.50E-07 |
| GO:0030029 | actin filament-based process                        | 629       | 46          | 17.43    | 1.90E-09 | 2.60E-07 |

Supplementary Table S2B: Significant gene ontology categories for expressed genes in platelets

| GO.ID      | Term                                                                             | Annotated | Significant | Expected | pval     | qval     |
|------------|----------------------------------------------------------------------------------|-----------|-------------|----------|----------|----------|
| GO:0015833 | peptide transport                                                                | 1620      | 86          | 44.9     | 2.00E-09 | 2.71E-07 |
| GO:0072599 | establishment of protein localization to endoplasmic reticulum                   | 101       | 17          | 2.8      | 2.30E-09 | 3.07E-07 |
| GO:0006886 | intracellular protein transport                                                  | 778       | 52          | 21.56    | 3.50E-09 | 4.62E-07 |
| GO:0006614 | SRP-dependent cotranslational protein targeting to membrane                      | 92        | 16          | 2.55     | 4.20E-09 | 5.48E-07 |
| GO:0006613 | cotranslational protein targeting to membrane                                    | 95        | 16          | 2.63     | 6.90E-09 | 8.90E-07 |
| GO:0097435 | supramolecular fiber organization                                                | 512       | 39          | 14.19    | 1.10E-08 | 1.40E-06 |
| GO:0065003 | protein-containing complex assembly                                              | 1579      | 82          | 43.76    | 1.40E-08 | 1.76E-06 |
| GO:0065009 | regulation of molecular function                                                 | 2860      | 126         | 79.26    | 2.10E-08 | 2.62E-06 |
| GO:0050789 | regulation of biological process                                                 | 10213     | 336         | 283.04   | 2.80E-08 | 3.41E-06 |
| GO:0061024 | membrane organization                                                            | 664       | 45          | 18.4     | 2.80E-08 | 3.41E-06 |
| GO:0042221 | response to chemical                                                             | 4227      | 169         | 117.14   | 3.00E-08 | 3.61E-06 |
| GO:0043933 | protein-containing complex subunit organization                                  | 1858      | 91          | 51.49    | 3.20E-08 | 3.81E-06 |
| GO:0006612 | protein targeting to membrane                                                    | 151       | 19          | 4.18     | 3.80E-08 | 4.48E-06 |
| GO:0051049 | regulation of transport                                                          | 1670      | 84          | 46.28    | 3.90E-08 | 4.55E-06 |
| GO:0021762 | substantia nigra development                                                     | 37        | 10          | 1.03     | 4.30E-08 | 4.91E-06 |
| GO:0006909 | phagocytosis                                                                     | 236       | 24          | 6.54     | 4.30E-08 | 4.91E-06 |
| GO:1903827 | regulation of cellular protein localization                                      | 474       | 36          | 13.14    | 4.60E-08 | 5.20E-06 |
| GO:0048519 | negative regulation of biological process                                        | 5075      | 194         | 140.65   | 4.70E-08 | 5.26E-06 |
| GO:0043085 | positive regulation of catalytic activity                                        | 1223      | 67          | 33.89    | 5.20E-08 | 5.76E-06 |
| GO:0097581 | lamellipodium organization                                                       | 70        | 13          | 1.94     | 5.40E-08 | 5.92E-06 |
| GO:0050794 | regulation of cellular process                                                   | 9281      | 311         | 257.21   | 5.60E-08 | 6.08E-06 |
| GO:0008154 | actin polymerization or depolymerization                                         | 155       | 19          | 4.3      | 5.90E-08 | 6.34E-06 |
| GO:0048523 | negative regulation of cellular process                                          | 4237      | 168         | 117.42   | 6.40E-08 | 6.81E-06 |
| GO:0051246 | regulation of protein metabolic process                                          | 2465      | 111         | 68.31    | 6.50E-08 | 6.85E-06 |
| GO:0051704 | multi-organism process                                                           | 2290      | 105         | 63.46    | 6.70E-08 | 6.99E-06 |
| GO:0055080 | cation homeostasis                                                               | 553       | 39          | 15.33    | 9.00E-08 | 9.30E-06 |
| GO:0009719 | response to endogenous stimulus                                                  | 1488      | 76          | 41.24    | 1.10E-07 | 1.13E-05 |
| GO:0098869 | cellular oxidant detoxification                                                  | 88        | 14          | 2.44     | 1.30E-07 | 1.32E-05 |
| GO:0008219 | cell death                                                                       | 2061      | 96          | 57.12    | 1.40E-07 | 1.41E-05 |
| GO:0098771 | inorganic ion homeostasis                                                        | 565       | 39          | 15.66    | 1.60E-07 | 1.55E-05 |
| GO:0008064 | regulation of actin polymerization or depolymerization                           | 133       | 17          | 3.69     | 1.60E-07 | 1.55E-05 |
| GO:0043112 | receptor metabolic process                                                       | 165       | 19          | 4.57     | 1.60E-07 | 1.55E-05 |
| GO:0019080 | viral gene expression                                                            | 182       | 20          | 5.04     | 1.60E-07 | 1.55E-05 |
| GO:0030832 | regulation of actin filament length                                              | 134       | 17          | 3.71     | 1.80E-07 | 1.72E-05 |
| GO:0009894 | regulation of catabolic process                                                  | 853       | 51          | 23.64    | 1.80E-07 | 1.72E-05 |
| GO:0097190 | apoptotic signaling pathway                                                      | 546       | 38          | 15.13    | 1.90E-07 | 1.80E-05 |
| GO:0044265 | cellular macromolecule catabolic process                                         | 931       | 54          | 25.8     | 2.00E-07 | 1.86E-05 |
| GO:0051493 | regulation of cytoskeleton organization                                          | 438       | 33          | 12.14    | 2.00E-07 | 1.86E-05 |
| GO:0032268 | regulation of cellular protein metabolic process                                 | 2287      | 103         | 63.38    | 2.30E-07 | 2.12E-05 |
| GO:0030003 | cellular cation homeostasis                                                      | 488       | 35          | 13.52    | 2.80E-07 | 2.56E-05 |
| GO:0048518 | positive regulation of biological process                                        | 5298      | 197         | 146.83   | 3.20E-07 | 2.87E-05 |
| GO:0010324 | membrane invagination                                                            | 56        | 11          | 1.55     | 3.20E-07 | 2.87E-05 |
| GO:0055076 | transition metal ion homeostasis                                                 | 95        | 14          | 2.63     | 3.40E-07 | 3.00E-05 |
| GO:0032880 | regulation of protein localization                                               | 921       | 53          | 25.52    | 3.40E-07 | 3.00E-05 |
| GO:0009636 | response to toxic substance                                                      | 471       | 34          | 13.05    | 3.60E-07 | 3.13E-05 |
| GO:0000184 | nuclear-transcribed mRNA catabolic process, nonsense-mediated decay              | 110       | 15          | 3.05     | 3.60E-07 | 3.13E-05 |
| GO:0071310 | cellular response to organic substance                                           | 2428      | 107         | 67.29    | 3.70E-07 | 3.14E-05 |
| GO:0098609 | cell-cell adhesion                                                               | 726       | 45          | 20.12    | 3.70E-07 | 3.14E-05 |
| GO:0065007 | biological regulation                                                            | 10751     | 345         | 297.95   | 3.70E-07 | 3.14E-05 |
| GO:1990748 | cellular detoxification                                                          | 96        | 14          | 2.66     | 3.90E-07 | 3.29E-05 |
| GO:0010035 | response to inorganic substance                                                  | 497       | 35          | 13.77    | 4.40E-07 | 3.68E-05 |
| GO:0010033 | response to organic substance                                                    | 2960      | 124         | 82.03    | 5.00E-07 | 4.15E-05 |
| GO:0006873 | cellular ion homeostasis                                                         | 501       | 35          | 13.88    | 5.30E-07 | 4.37E-05 |
| GO:0140029 | exocytic process                                                                 | 59        | 11          | 1.64     | 5.50E-07 | 4.50E-05 |
| GO:0006936 | muscle contraction                                                               | 331       | 27          | 9.17     | 5.80E-07 | 4.71E-05 |
| GO:0099024 | plasma membrane invagination                                                     | 48        | 10          | 1.33     | 6.10E-07 | 4.92E-05 |
| GO:0060548 | negative regulation of cell death                                                | 942       | 53          | 26.11    | 6.80E-07 | 5.44E-05 |
| GO:0043254 | regulation of protein complex assembly                                           | 376       | 29          | 10.42    | 7.10E-07 | 5.64E-05 |
| GO:0006826 | iron ion transport                                                               | 49        | 10          | 1.36     | 7.50E-07 | 5.91E-05 |
| GO:0006914 | autophagy                                                                        | 442       | 32          | 12.25    | 7.60E-07 | 5.91E-05 |
| GO:0061919 | process utilizing autophagic mechanism                                           | 442       | 32          | 12.25    | 7.60E-07 | 5.91E-05 |
| GO:0098754 | detoxification                                                                   | 102       | 14          | 2.83     | 8.30E-07 | 6.41E-05 |
| GO:0012501 | programmed cell death                                                            | 1938      | 89          | 53.71    | 8.50E-07 | 6.47E-05 |
| GO:0032956 | regulation of actin cytoskeleton organization                                    | 277       | 24          | 7.68     | 8.50E-07 | 6.47E-05 |
| GO:0007229 | integrin-mediated signaling pathway                                              | 88        | 13          | 2.44     | 8.70E-07 | 6.58E-05 |
| GO:0043281 | regulation of cysteine-type endopeptidase activity involved in apoptotic process | 184       | 19          | 5.1      | 8.80E-07 | 6.61E-05 |
| GO:0006915 | apoptotic process                                                                | 1797      | 84          | 49.8     | 9.10E-07 | 6.74E-05 |
| GO:0050801 | ion homeostasis                                                                  | 629       | 40          | 17.43    | 9.10E-07 | 6.74E-05 |
| GO:0007015 | actin filament organization                                                      | 299       | 25          | 8.29     | 9.70E-07 | 7.13E-05 |
| GO:1905475 | regulation of protein localization to membrane                                   | 168       | 18          | 4.66     | 1.00E-06 | 7.31E-05 |
| GO:0051336 | regulation of hydrolase activity                                                 | 1086      | 58          | 30.1     | 1.10E-06 | 7.88E-05 |
| GO:0006518 | peptide metabolic process                                                        | 755       | 45          | 20.92    | 1.10E-06 | 7.88E-05 |
| GO:0046916 | cellular transition metal ion homeostasis                                        | 76        | 12          | 2.11     | 1.10E-06 | 7.88E-05 |
| GO:0010941 | regulation of cell death                                                         | 1558      | 75          | 43.18    | 1.30E-06 | 9.25E-05 |
| GO:0055065 | metal ion homeostasis                                                            | 499       | 34          | 13.83    | 1.40E-06 | 9.77E-05 |
| GO:1902905 | positive regulation of supramolecular fiber organization                         | 172       | 18          | 4.77     | 1.40E-06 | 9.77E-05 |
| GO:1902903 | regulation of supramolecular fiber organization                                  | 285       | 24          | 7.9      | 1.40E-06 | 9.77E-05 |
| GO:0033043 | regulation of organelle organization                                             | 1071      | 57          | 29.68    | 1.50E-06 | 1.03E-04 |
| GO:0044093 | positive regulation of molecular function                                        | 1536      | 74          | 42.57    | 1.50E-06 | 1.03E-04 |
| GO:0006446 | regulation of translational initiation                                           | 66        | 11          | 1.83     | 1.80E-06 | 1.23E-04 |

Supplementary Table S2B: Significant gene ontology categories for expressed genes in platelets

| GO.ID      | Term                                                       | Annotated | Significant | Expected | pval     | qual     |
|------------|------------------------------------------------------------|-----------|-------------|----------|----------|----------|
| GO:0044267 | cellular protein metabolic process                         | 4512      | 170         | 125.04   | 1.80E-06 | 1.23E-04 |
| GO:0030032 | lamellipodium assembly                                     | 54        | 10          | 1.5      | 1.90E-06 | 1.29E-04 |
| GO:0071495 | cellular response to endogenous stimulus                   | 1243      | 63          | 34.45    | 2.00E-06 | 1.34E-04 |
| GO:0006898 | receptor-mediated endocytosis                              | 233       | 21          | 6.46     | 2.20E-06 | 1.47E-04 |
| GO:0048857 | neural nucleus development                                 | 55        | 10          | 1.52     | 2.30E-06 | 1.53E-04 |
| GO:0055072 | iron ion homeostasis                                       | 68        | 11          | 1.88     | 2.40E-06 | 1.57E-04 |
| GO:0010506 | regulation of autophagy                                    | 294       | 24          | 8.15     | 2.40E-06 | 1.57E-04 |
| GO:0051051 | negative regulation of transport                           | 468       | 32          | 12.97    | 2.60E-06 | 1.69E-04 |
| GO:0007010 | cytoskeleton organization                                  | 1038      | 55          | 28.77    | 2.60E-06 | 1.69E-04 |
| GO:0048878 | chemical homeostasis                                       | 960       | 52          | 26.6     | 2.70E-06 | 1.74E-04 |
| GO:0048522 | positive regulation of cellular process                    | 4675      | 174         | 129.56   | 2.80E-06 | 1.79E-04 |
| GO:0043069 | negative regulation of programmed cell death               | 860       | 48          | 23.83    | 3.00E-06 | 1.91E-04 |
| GO:0031329 | regulation of cellular catabolic process                   | 760       | 44          | 21.06    | 3.10E-06 | 1.96E-04 |
| GO:0060627 | regulation of vesicle-mediated transport                   | 450       | 31          | 12.47    | 3.20E-06 | 2.02E-04 |
| GO:0032970 | regulation of actin filament-based process                 | 320       | 25          | 8.87     | 3.30E-06 | 2.07E-04 |
| GO:0097193 | intrinsic apoptotic signaling pathway                      | 259       | 22          | 7.18     | 3.40E-06 | 2.12E-04 |
| GO:0043066 | negative regulation of apoptotic process                   | 839       | 47          | 23.25    | 3.50E-06 | 2.17E-04 |
| GO:0051130 | positive regulation of cellular component organization     | 1102      | 57          | 30.54    | 3.60E-06 | 2.22E-04 |
| GO:0052548 | regulation of endopeptidase activity                       | 343       | 26          | 9.51     | 3.70E-06 | 2.27E-04 |
| GO:0030041 | actin filament polymerization                              | 132       | 15          | 3.66     | 3.80E-06 | 2.31E-04 |
| GO:0042592 | homeostatic process                                        | 1632      | 76          | 45.23    | 3.90E-06 | 2.36E-04 |
| GO:0010942 | positive regulation of cell death                          | 668       | 40          | 18.51    | 4.00E-06 | 2.41E-04 |
| GO:0019725 | cellular homeostasis                                       | 768       | 44          | 21.28    | 4.10E-06 | 2.46E-04 |
| GO:2001242 | regulation of intrinsic apoptotic signaling pathway        | 150       | 16          | 4.16     | 4.20E-06 | 2.50E-04 |
| GO:0040012 | regulation of locomotion                                   | 950       | 51          | 26.33    | 4.40E-06 | 2.58E-04 |
| GO:0030833 | regulation of actin filament polymerization                | 117       | 14          | 3.24     | 4.40E-06 | 2.58E-04 |
| GO:0032386 | regulation of intracellular transport                      | 368       | 27          | 10.2     | 4.40E-06 | 2.58E-04 |
| GO:0019083 | viral transcription                                        | 169       | 17          | 4.68     | 4.70E-06 | 2.73E-04 |
| GO:0003012 | muscle system process                                      | 436       | 30          | 12.08    | 4.70E-06 | 2.73E-04 |
| GO:0051247 | positive regulation of protein metabolic process           | 1443      | 69          | 39.99    | 4.80E-06 | 2.77E-04 |
| GO:0043067 | regulation of programmed cell death                        | 1445      | 69          | 40.05    | 5.00E-06 | 2.87E-04 |
| GO:0030162 | regulation of proteolysis                                  | 650       | 39          | 18.01    | 5.10E-06 | 2.91E-04 |
| GO:0006875 | cellular metal ion homeostasis                             | 439       | 30          | 12.17    | 5.40E-06 | 3.07E-04 |
| GO:0019220 | regulation of phosphate metabolic process                  | 1562      | 73          | 43.29    | 5.50E-06 | 3.11E-04 |
| GO:0044270 | cellular nitrogen compound catabolic process               | 604       | 37          | 16.74    | 5.60E-06 | 3.15E-04 |
| GO:2001233 | regulation of apoptotic signaling pathway                  | 373       | 27          | 10.34    | 5.70E-06 | 3.17E-04 |
| GO:0051174 | regulation of phosphorus metabolic process                 | 1564      | 73          | 43.34    | 5.70E-06 | 3.17E-04 |
| GO:0016477 | cell migration                                             | 1312      | 64          | 36.36    | 5.90E-06 | 3.25E-04 |
| GO:0110053 | regulation of actin filament organization                  | 209       | 19          | 5.79     | 5.90E-06 | 3.25E-04 |
| GO:0032535 | regulation of cellular component size                      | 289       | 23          | 8.01     | 6.00E-06 | 3.29E-04 |
| GO:0030334 | regulation of cell migration                               | 831       | 46          | 23.03    | 6.10E-06 | 3.33E-04 |
| GO:2000116 | regulation of cysteine-type endopeptidase activity         | 210       | 19          | 5.82     | 6.30E-06 | 3.42E-04 |
| GO:0030838 | positive regulation of actin filament polymerization       | 75        | 11          | 2.08     | 6.50E-06 | 3.51E-04 |
| GO:0051640 | organelle localization                                     | 584       | 36          | 16.18    | 6.60E-06 | 3.55E-04 |
| GO:1901565 | organonitrogen compound catabolic process                  | 1045      | 54          | 28.96    | 6.80E-06 | 3.64E-04 |
| GO:0034655 | nucleobase-containing compound catabolic process           | 562       | 35          | 15.57    | 7.10E-06 | 3.78E-04 |
| GO:0031324 | negative regulation of cellular metabolic process          | 2250      | 96          | 62.36    | 7.20E-06 | 3.81E-04 |
| GO:0030100 | regulation of endocytosis                                  | 252       | 21          | 6.98     | 7.60E-06 | 4.00E-04 |
| GO:0019068 | virion assembly                                            | 38        | 8           | 1.05     | 7.70E-06 | 4.04E-04 |
| GO:0051050 | positive regulation of transport                           | 891       | 48          | 24.69    | 7.80E-06 | 4.07E-04 |
| GO:1901564 | organonitrogen compound metabolic process                  | 5942      | 209         | 164.67   | 7.90E-06 | 4.10E-04 |
| GO:0015669 | gas transport                                              | 19        | 6           | 0.53     | 8.70E-06 | 4.50E-04 |
| GO:0051235 | maintenance of location                                    | 275       | 22          | 7.62     | 8.90E-06 | 4.58E-04 |
| GO:1903828 | negative regulation of cellular protein localization       | 108       | 13          | 2.99     | 9.00E-06 | 4.61E-04 |
| GO:0006911 | phagocytosis, engulfment                                   | 39        | 8           | 1.08     | 9.40E-06 | 4.79E-04 |
| GO:0042981 | regulation of apoptotic process                            | 1419      | 67          | 39.33    | 1.00E-05 | 5.07E-04 |
| GO:0043269 | regulation of ion transport                                | 598       | 36          | 16.57    | 1.10E-05 | 5.50E-04 |
| GO:0006879 | cellular iron ion homeostasis                              | 52        | 9           | 1.44     | 1.10E-05 | 5.50E-04 |
| GO:1901700 | response to oxygen-containing compound                     | 1481      | 69          | 41.04    | 1.10E-05 | 5.50E-04 |
| GO:0010959 | regulation of metal ion transport                          | 344       | 25          | 9.53     | 1.20E-05 | 5.84E-04 |
| GO:0030335 | positive regulation of cell migration                      | 480       | 31          | 13.3     | 1.20E-05 | 5.84E-04 |
| GO:0090066 | regulation of anatomical structure size                    | 411       | 28          | 11.39    | 1.20E-05 | 5.84E-04 |
| GO:0000956 | nuclear-transcribed mRNA catabolic process                 | 181       | 17          | 5.02     | 1.20E-05 | 5.84E-04 |
| GO:0051248 | negative regulation of protein metabolic process           | 1039      | 53          | 28.79    | 1.20E-05 | 5.84E-04 |
| GO:0007155 | cell adhesion                                              | 1259      | 61          | 34.89    | 1.20E-05 | 5.84E-04 |
| GO:0040017 | positive regulation of locomotion                          | 529       | 33          | 14.66    | 1.30E-05 | 6.19E-04 |
| GO:1903034 | regulation of response to wounding                         | 164       | 16          | 4.54     | 1.30E-05 | 6.19E-04 |
| GO:2000145 | regulation of cell motility                                | 883       | 47          | 24.47    | 1.30E-05 | 6.19E-04 |
| GO:0048870 | cell motility                                              | 1431      | 67          | 39.66    | 1.30E-05 | 6.19E-04 |
| GO:0051674 | localization of cell                                       | 1431      | 67          | 39.66    | 1.30E-05 | 6.19E-04 |
| GO:0051172 | negative regulation of nitrogen compound metabolic process | 2105      | 90          | 58.34    | 1.40E-05 | 6.50E-04 |
| GO:0097237 | cellular response to toxic substance                       | 222       | 19          | 6.15     | 1.40E-05 | 6.50E-04 |
| GO:0019538 | protein metabolic process                                  | 5028      | 181         | 139.34   | 1.40E-05 | 6.50E-04 |
| GO:0052547 | regulation of peptidase activity                           | 370       | 26          | 10.25    | 1.40E-05 | 6.50E-04 |
| GO:0022610 | biological adhesion                                        | 1265      | 61          | 35.06    | 1.40E-05 | 6.50E-04 |
| GO:0055082 | cellular chemical homeostasis                              | 630       | 37          | 17.46    | 1.40E-05 | 6.50E-04 |
| GO:0034329 | cell junction assembly                                     | 204       | 18          | 5.65     | 1.60E-05 | 7.40E-04 |
| GO:0030834 | regulation of actin filament depolymerization              | 42        | 8           | 1.16     | 1.70E-05 | 7.83E-04 |
| GO:0031532 | actin cytoskeleton reorganization                          | 83        | 11          | 2.3      | 1.80E-05 | 8.25E-04 |
| GO:0030163 | protein catabolic process                                  | 739       | 41          | 20.48    | 1.90E-05 | 8.64E-04 |



Supplementary Table S2B: Significant gene ontology categories for expressed genes in platelets

| GO.ID      | Term                                                                                                    | Annotated | Significant | Expected | pval     | qval     |
|------------|---------------------------------------------------------------------------------------------------------|-----------|-------------|----------|----------|----------|
| GO:0048583 | regulation of response to stimulus                                                                      | 3919      | 147         | 108.61   | 1.90E-05 | 8.64E-04 |
| GO:0019439 | aromatic compound catabolic process                                                                     | 615       | 36          | 17.04    | 2.00E-05 | 9.06E-04 |
| GO:0044502 | positive regulation of signal transduction in other organism                                            | 3         | 3           | 0.08     | 2.10E-05 | 9.28E-04 |
| GO:0052470 | modulation by host of symbiont signal transduction pathway                                              | 3         | 3           | 0.08     | 2.10E-05 | 9.28E-04 |
| GO:0052525 | positive regulation by host of symbiont signal transduction pathway                                     | 3         | 3           | 0.08     | 2.10E-05 | 9.28E-04 |
| GO:0052526 | positive regulation by organism of signal transduction in other organism involved in symbiotic inter... | 3         | 3           | 0.08     | 2.10E-05 | 9.28E-04 |
| GO:0075205 | modulation by host of symbiont cAMP-mediated signal transduction                                        | 3         | 3           | 0.08     | 2.10E-05 | 9.28E-04 |
| GO:0075206 | positive regulation by host of symbiont cAMP-mediated signal transduction                               | 3         | 3           | 0.08     | 2.10E-05 | 9.28E-04 |
| GO:1901361 | organic cyclic compound catabolic process                                                               | 644       | 37          | 17.85    | 2.30E-05 | 1.01E-03 |
| GO:0051258 | protein polymerization                                                                                  | 211       | 18          | 5.85     | 2.50E-05 | 1.07E-03 |
| GO:0043068 | positive regulation of programmed cell death                                                            | 621       | 36          | 17.21    | 2.50E-05 | 1.07E-03 |
| GO:0034622 | cellular protein-containing complex assembly                                                            | 826       | 44          | 22.89    | 2.50E-05 | 1.07E-03 |
| GO:0061041 | regulation of wound healing                                                                             | 136       | 14          | 3.77     | 2.50E-05 | 1.07E-03 |
| GO:2000147 | positive regulation of cell motility                                                                    | 499       | 31          | 13.83    | 2.50E-05 | 1.07E-03 |
| GO:0051270 | regulation of cellular component movement                                                               | 959       | 49          | 26.58    | 2.50E-05 | 1.07E-03 |
| GO:0010951 | negative regulation of endopeptidase activity                                                           | 192       | 17          | 5.32     | 2.60E-05 | 1.11E-03 |
| GO:0051280 | negative regulation of release of sequestered calcium ion into cytosol                                  | 14        | 5           | 0.39     | 2.60E-05 | 1.11E-03 |
| GO:0051345 | positive regulation of hydrolase activity                                                               | 648       | 37          | 17.96    | 2.70E-05 | 1.14E-03 |
| GO:0006928 | movement of cell or subcellular component                                                               | 1812      | 79          | 50.22    | 2.70E-05 | 1.14E-03 |
| GO:2001243 | negative regulation of intrinsic apoptotic signaling pathway                                            | 87        | 11          | 2.41     | 2.80E-05 | 1.18E-03 |
| GO:0006402 | mRNA catabolic process                                                                                  | 318       | 23          | 8.81     | 2.80E-05 | 1.18E-03 |
| GO:0030042 | actin filament depolymerization                                                                         | 45        | 8           | 1.25     | 2.90E-05 | 1.21E-03 |
| GO:1903076 | regulation of protein localization to plasma membrane                                                   | 88        | 11          | 2.44     | 3.10E-05 | 1.28E-03 |
| GO:0010243 | response to organonitrogen compound                                                                     | 886       | 46          | 24.55    | 3.10E-05 | 1.28E-03 |
| GO:0046700 | heterocycle catabolic process                                                                           | 603       | 35          | 16.71    | 3.10E-05 | 1.28E-03 |
| GO:0043154 | negative regulation of cysteine-type endopeptidase activity involved in apoptotic process               | 73        | 10          | 2.02     | 3.10E-05 | 1.28E-03 |
| GO:0040011 | locomotion                                                                                              | 1646      | 73          | 45.62    | 3.30E-05 | 1.35E-03 |
| GO:0007154 | cell communication                                                                                      | 5575      | 195         | 154.5    | 3.40E-05 | 1.39E-03 |
| GO:0032270 | positive regulation of cellular protein metabolic process                                               | 1359      | 63          | 37.66    | 3.40E-05 | 1.39E-03 |
| GO:0006979 | response to oxidative stress                                                                            | 413       | 27          | 11.45    | 3.50E-05 | 1.42E-03 |
| GO:0031334 | positive regulation of protein complex assembly                                                         | 217       | 18          | 6.01     | 3.60E-05 | 1.46E-03 |
| GO:0051014 | actin filament severing                                                                                 | 8         | 4           | 0.22     | 3.70E-05 | 1.48E-03 |
| GO:0060316 | positive regulation of ryanodine-sensitive calcium-release channel activity                             | 8         | 4           | 0.22     | 3.70E-05 | 1.48E-03 |
| GO:0034330 | cell junction organization                                                                              | 259       | 20          | 7.18     | 3.70E-05 | 1.48E-03 |
| GO:0015671 | oxygen transport                                                                                        | 15        | 5           | 0.42     | 3.80E-05 | 1.51E-03 |
| GO:0051284 | positive regulation of sequestering of calcium ion                                                      | 15        | 5           | 0.42     | 3.80E-05 | 1.51E-03 |
| GO:0043603 | cellular amide metabolic process                                                                        | 975       | 49          | 27.02    | 3.90E-05 | 1.54E-03 |
| GO:0023052 | signaling                                                                                               | 5555      | 194         | 153.95   | 4.00E-05 | 1.58E-03 |
| GO:0043549 | regulation of kinase activity                                                                           | 764       | 41          | 21.17    | 4.10E-05 | 1.61E-03 |
| GO:0022411 | cellular component disassembly                                                                          | 465       | 29          | 12.89    | 4.30E-05 | 1.68E-03 |
| GO:0051272 | positive regulation of cellular component movement                                                      | 514       | 31          | 14.24    | 4.40E-05 | 1.72E-03 |
| GO:0043065 | positive regulation of apoptotic process                                                                | 614       | 35          | 17.02    | 4.60E-05 | 1.79E-03 |
| GO:0009987 | cellular process                                                                                        | 14228     | 418         | 394.31   | 4.70E-05 | 1.81E-03 |
| GO:0044092 | negative regulation of molecular function                                                               | 1010      | 50          | 27.99    | 4.70E-05 | 1.81E-03 |
| GO:0010562 | positive regulation of phosphorus metabolic process                                                     | 958       | 48          | 26.55    | 5.00E-05 | 1.92E-03 |
| GO:0045937 | positive regulation of phosphate metabolic process                                                      | 958       | 48          | 26.55    | 5.00E-05 | 1.92E-03 |
| GO:0045859 | regulation of protein kinase activity                                                                   | 695       | 38          | 19.26    | 5.30E-05 | 2.02E-03 |
| GO:0009605 | response to external stimulus                                                                           | 2119      | 88          | 58.72    | 5.30E-05 | 2.02E-03 |
| GO:0010466 | negative regulation of peptidase activity                                                               | 204       | 17          | 5.65     | 5.50E-05 | 2.09E-03 |
| GO:0032271 | regulation of protein polymerization                                                                    | 165       | 15          | 4.57     | 5.60E-05 | 2.12E-03 |
| GO:0051924 | regulation of calcium ion transport                                                                     | 227       | 18          | 6.29     | 6.50E-05 | 2.45E-03 |
| GO:0007160 | cell-matrix adhesion                                                                                    | 207       | 17          | 5.74     | 6.70E-05 | 2.51E-03 |
| GO:2001234 | negative regulation of apoptotic signaling pathway                                                      | 209       | 17          | 5.79     | 7.50E-05 | 2.81E-03 |
| GO:0006812 | cation transport                                                                                        | 947       | 47          | 26.24    | 7.60E-05 | 2.83E-03 |
| GO:0031399 | regulation of protein modification process                                                              | 1601      | 70          | 44.37    | 7.70E-05 | 2.86E-03 |
| GO:2000117 | negative regulation of cysteine-type endopeptidase activity                                             | 81        | 10          | 2.24     | 7.80E-05 | 2.89E-03 |
| GO:0032269 | negative regulation of cellular protein metabolic process                                               | 976       | 48          | 27.05    | 7.90E-05 | 2.91E-03 |
| GO:0010800 | positive regulation of peptidyl-threonine phosphorylation                                               | 27        | 6           | 0.75     | 7.90E-05 | 2.91E-03 |
| GO:0045861 | negative regulation of proteolysis                                                                      | 296       | 21          | 8.2      | 8.30E-05 | 3.03E-03 |
| GO:0051343 | positive regulation of cyclic-nucleotide phosphodiesterase activity                                     | 4         | 3           | 0.11     | 8.30E-05 | 3.03E-03 |
| GO:1901698 | response to nitrogen compound                                                                           | 951       | 47          | 26.36    | 8.40E-05 | 3.05E-03 |
| GO:0007167 | enzyme linked receptor protein signaling pathway                                                        | 924       | 46          | 25.61    | 8.40E-05 | 3.05E-03 |
| GO:0045010 | actin nucleation                                                                                        | 39        | 7           | 1.08     | 8.50E-05 | 3.07E-03 |
| GO:0044087 | regulation of cellular component biogenesis                                                             | 817       | 42          | 22.64    | 8.60E-05 | 3.10E-03 |
| GO:1903829 | positive regulation of cellular protein localization                                                    | 297       | 21          | 8.23     | 8.70E-05 | 3.13E-03 |
| GO:0010038 | response to metal ion                                                                                   | 320       | 22          | 8.87     | 8.90E-05 | 3.19E-03 |
| GO:0042325 | regulation of phosphorylation                                                                           | 1377      | 62          | 38.16    | 9.20E-05 | 3.28E-03 |
| GO:0000041 | transition metal ion transport                                                                          | 83        | 10          | 2.3      | 9.60E-05 | 3.40E-03 |
| GO:0030901 | midbrain development                                                                                    | 83        | 10          | 2.3      | 9.60E-05 | 3.40E-03 |
| GO:0050900 | leukocyte migration                                                                                     | 391       | 25          | 10.84    | 9.70E-05 | 3.43E-03 |
| GO:1903573 | negative regulation of response to endoplasmic reticulum stress                                         | 40        | 7           | 1.11     | 1.00E-04 | 3.46E-03 |
| GO:0010523 | negative regulation of calcium ion transport into cytosol                                               | 18        | 5           | 0.5      | 1.00E-04 | 3.46E-03 |
| GO:0042176 | regulation of protein catabolic process                                                                 | 323       | 22          | 8.95     | 1.00E-04 | 3.46E-03 |
| GO:0006401 | RNA catabolic process                                                                                   | 346       | 23          | 9.59     | 1.00E-04 | 3.46E-03 |
| GO:0006508 | proteolysis                                                                                             | 1470      | 65          | 40.74    | 1.00E-04 | 3.46E-03 |
| GO:0007169 | transmembrane receptor protein tyrosine kinase signaling pathway                                        | 640       | 35          | 17.74    | 1.00E-04 | 3.46E-03 |
| GO:0045807 | positive regulation of endocytosis                                                                      | 136       | 13          | 3.77     | 1.00E-04 | 3.46E-03 |
| GO:0031333 | negative regulation of protein complex assembly                                                         | 118       | 12          | 3.27     | 1.10E-04 | 3.76E-03 |
| GO:0031667 | response to nutrient levels                                                                             | 441       | 27          | 12.22    | 1.10E-04 | 3.76E-03 |
| GO:0060315 | negative regulation of ryanodine-sensitive calcium-release channel activity                             | 10        | 4           | 0.28     | 1.10E-04 | 3.76E-03 |

Supplementary Table S2B: Significant gene ontology categories for expressed genes in platelets

| GO.ID      | Term                                                                                  | Annotated | Significant | Expected | pval     | qval     |
|------------|---------------------------------------------------------------------------------------|-----------|-------------|----------|----------|----------|
| GO:0006937 | regulation of muscle contraction                                                      | 156       | 14          | 4.32     | 1.10E-04 | 3.76E-03 |
| GO:0007165 | signal transduction                                                                   | 5132      | 179         | 142.22   | 1.20E-04 | 4.05E-03 |
| GO:0051656 | establishment of organelle localization                                               | 420       | 26          | 11.64    | 1.20E-04 | 4.05E-03 |
| GO:1905476 | negative regulation of protein localization to membrane                               | 29        | 6           | 0.8      | 1.20E-04 | 4.05E-03 |
| GO:0000910 | cytokinesis                                                                           | 138       | 13          | 3.82     | 1.20E-04 | 4.05E-03 |
| GO:0043043 | peptide biosynthetic process                                                          | 647       | 35          | 17.93    | 1.30E-04 | 4.36E-03 |
| GO:0019058 | viral life cycle                                                                      | 306       | 21          | 8.48     | 1.30E-04 | 4.36E-03 |
| GO:0045860 | positive regulation of protein kinase activity                                        | 475       | 28          | 13.16    | 1.50E-04 | 5.00E-03 |
| GO:0043086 | negative regulation of catalytic activity                                             | 705       | 37          | 19.54    | 1.50E-04 | 5.00E-03 |
| GO:0007166 | cell surface receptor signaling pathway                                               | 2589      | 101         | 71.75    | 1.60E-04 | 5.25E-03 |
| GO:0032273 | positive regulation of protein polymerization                                         | 105       | 11          | 2.91     | 1.60E-04 | 5.25E-03 |
| GO:0006811 | ion transport                                                                         | 1405      | 62          | 38.94    | 1.60E-04 | 5.25E-03 |
| GO:0042327 | positive regulation of phosphorylation                                                | 896       | 44          | 24.83    | 1.60E-04 | 5.25E-03 |
| GO:0051016 | barbed-end actin filament capping                                                     | 11        | 4           | 0.3      | 1.60E-04 | 5.25E-03 |
| GO:1904375 | regulation of protein localization to cell periphery                                  | 106       | 11          | 2.94     | 1.70E-04 | 5.54E-03 |
| GO:0048856 | anatomical structure development                                                      | 5235      | 181         | 145.08   | 1.70E-04 | 5.54E-03 |
| GO:0032801 | receptor catabolic process                                                            | 31        | 6           | 0.86     | 1.80E-04 | 5.85E-03 |
| GO:0010799 | regulation of peptidyl-threonine phosphorylation                                      | 44        | 7           | 1.22     | 1.90E-04 | 6.12E-03 |
| GO:0072659 | protein localization to plasma membrane                                               | 226       | 17          | 6.26     | 1.90E-04 | 6.12E-03 |
| GO:1904062 | regulation of cation transmembrane transport                                          | 292       | 20          | 8.09     | 1.90E-04 | 6.12E-03 |
| GO:0030193 | regulation of blood coagulation                                                       | 74        | 9           | 2.05     | 2.00E-04 | 6.33E-03 |
| GO:0002682 | regulation of immune system process                                                   | 1416      | 62          | 39.24    | 2.00E-04 | 6.33E-03 |
| GO:0022406 | membrane docking                                                                      | 145       | 13          | 4.02     | 2.00E-04 | 6.33E-03 |
| GO:0010572 | positive regulation of platelet activation                                            | 5         | 3           | 0.14     | 2.00E-04 | 6.33E-03 |
| GO:0044501 | modulation of signal transduction in other organism                                   | 5         | 3           | 0.14     | 2.00E-04 | 6.33E-03 |
| GO:0052250 | modulation of signal transduction in other organism involved in symbiotic interaction | 5         | 3           | 0.14     | 2.00E-04 | 6.33E-03 |
| GO:0034766 | negative regulation of ion transmembrane transport                                    | 91        | 10          | 2.52     | 2.10E-04 | 6.61E-03 |
| GO:0009892 | negative regulation of metabolic process                                              | 3025      | 114         | 83.83    | 2.10E-04 | 6.61E-03 |
| GO:0035722 | interleukin-12-mediated signaling pathway                                             | 45        | 7           | 1.25     | 2.20E-04 | 6.85E-03 |
| GO:0033674 | positive regulation of kinase activity                                                | 511       | 29          | 14.16    | 2.20E-04 | 6.85E-03 |
| GO:1900046 | regulation of hemostasis                                                              | 75        | 9           | 2.08     | 2.20E-04 | 6.85E-03 |
| GO:0051338 | regulation of transferase activity                                                    | 854       | 42          | 23.67    | 2.20E-04 | 6.85E-03 |
| GO:0045936 | negative regulation of phosphate metabolic process                                    | 538       | 30          | 14.91    | 2.30E-04 | 7.14E-03 |
| GO:0010563 | negative regulation of phosphorus metabolic process                                   | 539       | 30          | 14.94    | 2.40E-04 | 7.39E-03 |
| GO:0005513 | detection of calcium ion                                                              | 12        | 4           | 0.33     | 2.40E-04 | 7.39E-03 |
| GO:0051702 | interaction with symbiont                                                             | 76        | 9           | 2.11     | 2.40E-04 | 7.39E-03 |
| GO:0035304 | regulation of protein dephosphorylation                                               | 129       | 12          | 3.58     | 2.50E-04 | 7.67E-03 |
| GO:0050849 | negative regulation of calcium-mediated signaling                                     | 33        | 6           | 0.91     | 2.60E-04 | 7.94E-03 |
| GO:1901021 | positive regulation of calcium ion transmembrane transporter activity                 | 33        | 6           | 0.91     | 2.60E-04 | 7.94E-03 |
| GO:0051495 | positive regulation of cytoskeleton organization                                      | 190       | 15          | 5.27     | 2.70E-04 | 8.20E-03 |
| GO:0007044 | cell-substrate junction assembly                                                      | 94        | 10          | 2.61     | 2.70E-04 | 8.20E-03 |
| GO:0032502 | developmental process                                                                 | 5591      | 190         | 154.95   | 2.80E-04 | 8.36E-03 |
| GO:0032799 | low-density lipoprotein receptor particle metabolic process                           | 22        | 5           | 0.61     | 2.80E-04 | 8.36E-03 |
| GO:0033622 | integrin activation                                                                   | 22        | 5           | 0.61     | 2.80E-04 | 8.36E-03 |
| GO:0042744 | hydrogen peroxide catabolic process                                                   | 22        | 5           | 0.61     | 2.80E-04 | 8.36E-03 |
| GO:0060314 | regulation of ryanodine-sensitive calcium-release channel activity                    | 22        | 5           | 0.61     | 2.80E-04 | 8.36E-03 |
| GO:1903077 | negative regulation of protein localization to plasma membrane                        | 22        | 5           | 0.61     | 2.80E-04 | 8.36E-03 |
| GO:0043271 | negative regulation of ion transport                                                  | 131       | 12          | 3.63     | 2.90E-04 | 8.59E-03 |
| GO:0035303 | regulation of dephosphorylation                                                       | 191       | 15          | 5.29     | 2.90E-04 | 8.59E-03 |
| GO:0071349 | cellular response to interleukin-12                                                   | 47        | 7           | 1.3      | 2.90E-04 | 8.59E-03 |
| GO:1901879 | regulation of protein depolymerization                                                | 62        | 8           | 1.72     | 3.00E-04 | 8.81E-03 |
| GO:0050818 | regulation of coagulation                                                             | 78        | 9           | 2.16     | 3.00E-04 | 8.81E-03 |
| GO:0006412 | translation                                                                           | 624       | 33          | 17.29    | 3.00E-04 | 8.81E-03 |
| GO:0009991 | response to extracellular stimulus                                                    | 471       | 27          | 13.05    | 3.10E-04 | 9.08E-03 |
| GO:0007265 | Ras protein signal transduction                                                       | 303       | 20          | 8.4      | 3.20E-04 | 9.33E-03 |
| GO:0031623 | receptor internalization                                                              | 96        | 10          | 2.66     | 3.20E-04 | 9.33E-03 |
| GO:0048584 | positive regulation of response to stimulus                                           | 2108      | 84          | 58.42    | 3.30E-04 | 9.57E-03 |
| GO:0070671 | response to interleukin-12                                                            | 48        | 7           | 1.33     | 3.30E-04 | 9.57E-03 |
| GO:0070201 | regulation of establishment of protein localization                                   | 681       | 35          | 18.87    | 3.40E-04 | 9.81E-03 |
| GO:0006098 | pentose-phosphate shunt                                                               | 13        | 4           | 0.36     | 3.40E-04 | 9.81E-03 |
| GO:0031401 | positive regulation of protein modification process                                   | 1040      | 48          | 28.82    | 3.50E-04 | 9.94E-03 |
| GO:0034763 | negative regulation of transmembrane transport                                        | 115       | 11          | 3.19     | 3.50E-04 | 9.94E-03 |
| GO:0070838 | divalent metal ion transport                                                          | 425       | 25          | 11.78    | 3.50E-04 | 9.94E-03 |
| GO:0032989 | cellular component morphogenesis                                                      | 900       | 43          | 24.94    | 3.50E-04 | 9.94E-03 |
| GO:0009895 | negative regulation of catabolic process                                              | 260       | 18          | 7.21     | 3.50E-04 | 9.94E-03 |
| GO:0016050 | vesicle organization                                                                  | 260       | 18          | 7.21     | 3.50E-04 | 9.94E-03 |
| GO:0051239 | regulation of multicellular organismal process                                        | 2938      | 110         | 81.42    | 3.70E-04 | 1.04E-02 |
| GO:0031589 | cell-substrate adhesion                                                               | 307       | 20          | 8.51     | 3.70E-04 | 1.04E-02 |
| GO:0034765 | regulation of ion transmembrane transport                                             | 427       | 25          | 11.83    | 3.70E-04 | 1.04E-02 |
| GO:0002687 | positive regulation of leukocyte migration                                            | 116       | 11          | 3.21     | 3.80E-04 | 1.07E-02 |
| GO:0072511 | divalent inorganic cation transport                                                   | 428       | 25          | 11.86    | 3.90E-04 | 1.09E-02 |
| GO:0043604 | amide biosynthetic process                                                            | 767       | 38          | 21.26    | 3.90E-04 | 1.09E-02 |
| GO:1902956 | regulation of mitochondrial electron transport, NADH to ubiquinone                    | 6         | 3           | 0.17     | 4.00E-04 | 1.12E-02 |
| GO:0045862 | positive regulation of proteolysis                                                    | 309       | 20          | 8.56     | 4.10E-04 | 1.14E-02 |
| GO:0001934 | positive regulation of protein phosphorylation                                        | 852       | 41          | 23.61    | 4.20E-04 | 1.15E-02 |
| GO:0071900 | regulation of protein serine/threonine kinase activity                                | 455       | 26          | 12.61    | 4.20E-04 | 1.15E-02 |
| GO:0009725 | response to hormone                                                                   | 880       | 42          | 24.39    | 4.20E-04 | 1.15E-02 |
| GO:1902229 | regulation of intrinsic apoptotic signaling pathway in response to DNA damage         | 36        | 6           | 1        | 4.20E-04 | 1.15E-02 |
| GO:0051240 | positive regulation of multicellular organismal process                               | 1636      | 68          | 45.34    | 4.20E-04 | 1.15E-02 |
| GO:0140056 | organelle localization by membrane tethering                                          | 137       | 12          | 3.8      | 4.30E-04 | 1.18E-02 |

Supplementary Table S2B: Significant gene ontology categories for expressed genes in platelets

| GO.ID      | Term                                                                                         | Annotated | Significant | Expected | pval     | qval     |
|------------|----------------------------------------------------------------------------------------------|-----------|-------------|----------|----------|----------|
| GO:1901701 | cellular response to oxygen-containing compound                                              | 1022      | 47          | 28.32    | 4.40E-04 | 1.19E-02 |
| GO:0034762 | regulation of transmembrane transport                                                        | 507       | 28          | 14.05    | 4.40E-04 | 1.19E-02 |
| GO:0048169 | regulation of long-term neuronal synaptic plasticity                                         | 24        | 5           | 0.67     | 4.40E-04 | 1.19E-02 |
| GO:1904376 | negative regulation of protein localization to cell periphery                                | 24        | 5           | 0.67     | 4.40E-04 | 1.19E-02 |
| GO:0120031 | plasma membrane bounded cell projection assembly                                             | 457       | 26          | 12.66    | 4.50E-04 | 1.21E-02 |
| GO:0048585 | negative regulation of response to stimulus                                                  | 1520      | 64          | 42.12    | 4.50E-04 | 1.21E-02 |
| GO:0031330 | negative regulation of cellular catabolic process                                            | 221       | 16          | 6.12     | 4.60E-04 | 1.24E-02 |
| GO:0071375 | cellular response to peptide hormone stimulus                                                | 289       | 19          | 8.01     | 4.70E-04 | 1.26E-02 |
| GO:0043558 | regulation of translational initiation in response to stress                                 | 14        | 4           | 0.39     | 4.70E-04 | 1.26E-02 |
| GO:0022898 | regulation of transmembrane transporter activity                                             | 222       | 16          | 6.15     | 4.80E-04 | 1.28E-02 |
| GO:1903202 | negative regulation of oxidative stress-induced cell death                                   | 51        | 7           | 1.41     | 4.80E-04 | 1.28E-02 |
| GO:1903170 | negative regulation of calcium ion transmembrane transport                                   | 37        | 6           | 1.03     | 4.90E-04 | 1.30E-02 |
| GO:0035556 | intracellular signal transduction                                                            | 2450      | 94          | 67.9     | 5.00E-04 | 1.32E-02 |
| GO:0051346 | negative regulation of hydrolase activity                                                    | 386       | 23          | 10.7     | 5.00E-04 | 1.32E-02 |
| GO:0006470 | protein dephosphorylation                                                                    | 291       | 19          | 8.06     | 5.10E-04 | 1.34E-02 |
| GO:0007264 | small GTPase mediated signal transduction                                                    | 436       | 25          | 12.08    | 5.10E-04 | 1.34E-02 |
| GO:0071363 | cellular response to growth factor stimulus                                                  | 643       | 33          | 17.82    | 5.10E-04 | 1.34E-02 |
| GO:0071417 | cellular response to organonitrogen compound                                                 | 538       | 29          | 14.91    | 5.10E-04 | 1.34E-02 |
| GO:0036473 | cell death in response to oxidative stress                                                   | 84        | 9           | 2.33     | 5.20E-04 | 1.35E-02 |
| GO:0048013 | ephrin receptor signaling pathway                                                            | 84        | 9           | 2.33     | 5.20E-04 | 1.35E-02 |
| GO:0051261 | protein depolymerization                                                                     | 84        | 9           | 2.33     | 5.20E-04 | 1.35E-02 |
| GO:0030194 | positive regulation of blood coagulation                                                     | 25        | 5           | 0.69     | 5.40E-04 | 1.39E-02 |
| GO:1900048 | positive regulation of hemostasis                                                            | 25        | 5           | 0.69     | 5.40E-04 | 1.39E-02 |
| GO:0006816 | calcium ion transport                                                                        | 388       | 23          | 10.75    | 5.40E-04 | 1.39E-02 |
| GO:0009967 | positive regulation of signal transduction                                                   | 1500      | 63          | 41.57    | 5.40E-04 | 1.39E-02 |
| GO:0030031 | cell projection assembly                                                                     | 463       | 26          | 12.83    | 5.40E-04 | 1.39E-02 |
| GO:0001667 | ameboidal-type cell migration                                                                | 413       | 24          | 11.45    | 5.40E-04 | 1.39E-02 |
| GO:0035306 | positive regulation of dephosphorylation                                                     | 52        | 7           | 1.44     | 5.50E-04 | 1.41E-02 |
| GO:1900408 | negative regulation of cellular response to oxidative stress                                 | 52        | 7           | 1.44     | 5.50E-04 | 1.41E-02 |
| GO:0030099 | myeloid cell differentiation                                                                 | 389       | 23          | 10.78    | 5.60E-04 | 1.43E-02 |
| GO:0030001 | metal ion transport                                                                          | 755       | 37          | 20.92    | 5.70E-04 | 1.44E-02 |
| GO:0008631 | intrinsic apoptotic signaling pathway in response to oxidative stress                        | 38        | 6           | 1.05     | 5.70E-04 | 1.44E-02 |
| GO:0010605 | negative regulation of macromolecule metabolic process                                       | 2811      | 105         | 77.9     | 5.70E-04 | 1.44E-02 |
| GO:0051592 | response to calcium ion                                                                      | 122       | 11          | 3.38     | 5.80E-04 | 1.46E-02 |
| GO:0051129 | negative regulation of cellular component organization                                       | 622       | 32          | 17.24    | 6.00E-04 | 1.51E-02 |
| GO:0023051 | regulation of signaling                                                                      | 3400      | 123         | 94.23    | 6.00E-04 | 1.51E-02 |
| GO:0014070 | response to organic cyclic compound                                                          | 841       | 40          | 23.31    | 6.20E-04 | 1.54E-02 |
| GO:0022904 | respiratory electron transport chain                                                         | 86        | 9           | 2.38     | 6.20E-04 | 1.54E-02 |
| GO:0042246 | tissue regeneration                                                                          | 69        | 8           | 1.91     | 6.20E-04 | 1.54E-02 |
| GO:0061684 | chaperone-mediated autophagy                                                                 | 15        | 4           | 0.42     | 6.20E-04 | 1.54E-02 |
| GO:1990000 | amyloid fibril formation                                                                     | 15        | 4           | 0.42     | 6.20E-04 | 1.54E-02 |
| GO:0016311 | dephosphorylation                                                                            | 418       | 24          | 11.58    | 6.40E-04 | 1.59E-02 |
| GO:0006735 | NADH regeneration                                                                            | 26        | 5           | 0.72     | 6.50E-04 | 1.60E-02 |
| GO:0050820 | positive regulation of coagulation                                                           | 26        | 5           | 0.72     | 6.50E-04 | 1.60E-02 |
| GO:0061621 | canonical glycolysis                                                                         | 26        | 5           | 0.72     | 6.50E-04 | 1.60E-02 |
| GO:0061718 | glucose catabolic process to pyruvate                                                        | 26        | 5           | 0.72     | 6.50E-04 | 1.60E-02 |
| GO:0044257 | cellular protein catabolic process                                                           | 599       | 31          | 16.6     | 6.60E-04 | 1.62E-02 |
| GO:0010647 | positive regulation of cell communication                                                    | 1633      | 67          | 45.26    | 6.70E-04 | 1.64E-02 |
| GO:0001932 | regulation of protein phosphorylation                                                        | 1246      | 54          | 34.53    | 6.80E-04 | 1.66E-02 |
| GO:0051342 | regulation of cyclic-nucleotide phosphodiesterase activity                                   | 7         | 3           | 0.19     | 6.80E-04 | 1.66E-02 |
| GO:0042775 | mitochondrial ATP synthesis coupled electron transport                                       | 70        | 8           | 1.94     | 6.90E-04 | 1.67E-02 |
| GO:0051651 | maintenance of location in cell                                                              | 70        | 8           | 1.94     | 6.90E-04 | 1.67E-02 |
| GO:1902883 | negative regulation of response to oxidative stress                                          | 54        | 7           | 1.5      | 6.90E-04 | 1.67E-02 |
| GO:0080134 | regulation of response to stress                                                             | 1425      | 60          | 39.49    | 7.00E-04 | 1.69E-02 |
| GO:0051347 | positive regulation of transferase activity                                                  | 575       | 30          | 15.94    | 7.00E-04 | 1.69E-02 |
| GO:0080135 | regulation of cellular response to stress                                                    | 655       | 33          | 18.15    | 7.10E-04 | 1.70E-02 |
| GO:1902533 | positive regulation of intracellular signal transduction                                     | 960       | 44          | 26.6     | 7.10E-04 | 1.70E-02 |
| GO:0034333 | adherens junction assembly                                                                   | 88        | 9           | 2.44     | 7.30E-04 | 1.75E-02 |
| GO:0023056 | positive regulation of signaling                                                             | 1639      | 67          | 45.42    | 7.40E-04 | 1.77E-02 |
| GO:0042773 | ATP synthesis coupled electron transport                                                     | 71        | 8           | 1.97     | 7.50E-04 | 1.79E-02 |
| GO:0035307 | positive regulation of protein dephosphorylation                                             | 40        | 6           | 1.11     | 7.60E-04 | 1.81E-02 |
| GO:0032272 | negative regulation of protein polymerization                                                | 55        | 7           | 1.52     | 7.70E-04 | 1.82E-02 |
| GO:0051817 | modification of morphology or physiology of other organism involved in symbiotic interaction | 107       | 10          | 2.97     | 7.70E-04 | 1.82E-02 |
| GO:0006294 | nucleotide-excision repair, preincision complex assembly                                     | 27        | 5           | 0.75     | 7.80E-04 | 1.82E-02 |
| GO:0034314 | Arp2/3 complex-mediated actin nucleation                                                     | 27        | 5           | 0.75     | 7.80E-04 | 1.82E-02 |
| GO:0061615 | glycolytic process through fructose-6-phosphate                                              | 27        | 5           | 0.75     | 7.80E-04 | 1.82E-02 |
| GO:0061620 | glycolytic process through glucose-6-phosphate                                               | 27        | 5           | 0.75     | 7.80E-04 | 1.82E-02 |
| GO:0019882 | antigen processing and presentation                                                          | 210       | 15          | 5.82     | 7.80E-04 | 1.82E-02 |
| GO:0016236 | macroautophagy                                                                               | 255       | 17          | 7.07     | 7.80E-04 | 1.82E-02 |
| GO:0034248 | regulation of cellular amide metabolic process                                               | 424       | 24          | 11.75    | 7.90E-04 | 1.84E-02 |
| GO:0030030 | cell projection organization                                                                 | 1285      | 55          | 35.61    | 8.10E-04 | 1.88E-02 |
| GO:1902176 | negative regulation of oxidative stress-induced intrinsic apoptotic signaling pathway        | 16        | 4           | 0.44     | 8.10E-04 | 1.88E-02 |
| GO:0010821 | regulation of mitochondrion organization                                                     | 168       | 13          | 4.66     | 8.30E-04 | 1.92E-02 |
| GO:0051851 | modification by host of symbiont morphology or physiology                                    | 72        | 8           | 2        | 8.30E-04 | 1.92E-02 |
| GO:1903902 | positive regulation of viral life cycle                                                      | 56        | 7           | 1.55     | 8.60E-04 | 1.96E-02 |
| GO:0050793 | regulation of developmental process                                                          | 2427      | 92          | 67.26    | 8.60E-04 | 1.96E-02 |
| GO:0006119 | oxidative phosphorylation                                                                    | 90        | 9           | 2.49     | 8.60E-04 | 1.96E-02 |
| GO:0002437 | inflammatory response to antigenic stimulus                                                  | 41        | 6           | 1.14     | 8.60E-04 | 1.96E-02 |
| GO:0042743 | hydrogen peroxide metabolic process                                                          | 41        | 6           | 1.14     | 8.60E-04 | 1.96E-02 |
| GO:0090382 | phagosome maturation                                                                         | 41        | 6           | 1.14     | 8.60E-04 | 1.96E-02 |

Supplementary Table S2B: Significant gene ontology categories for expressed genes in platelets

| GO.ID      | Term                                                                                        | Annotated | Significant | Expected | pval     | qual     |
|------------|---------------------------------------------------------------------------------------------|-----------|-------------|----------|----------|----------|
| GO:0006796 | phosphate-containing compound metabolic process                                             | 2879      | 106         | 79.79    | 9.00E-04 | 2.05E-02 |
| GO:0090087 | regulation of peptide transport                                                             | 665       | 33          | 18.43    | 9.10E-04 | 2.06E-02 |
| GO:0098655 | cation transmembrane transport                                                              | 665       | 33          | 18.43    | 9.10E-04 | 2.06E-02 |
| GO:0050865 | regulation of cell activation                                                               | 506       | 27          | 14.02    | 9.20E-04 | 2.08E-02 |
| GO:0043388 | positive regulation of DNA binding                                                          | 57        | 7           | 1.58     | 9.60E-04 | 2.17E-02 |
| GO:0032409 | regulation of transporter activity                                                          | 237       | 16          | 6.57     | 9.70E-04 | 2.19E-02 |
| GO:0030837 | negative regulation of actin filament polymerization                                        | 42        | 6           | 1.16     | 9.90E-04 | 2.23E-02 |
| GO:0070848 | response to growth factor                                                                   | 669       | 33          | 18.54    | 1.01E-03 | 2.27E-02 |
| GO:0043280 | positive regulation of cysteine-type endopeptidase activity involved in apoptotic process   | 111       | 10          | 3.08     | 1.03E-03 | 2.30E-02 |
| GO:1901699 | cellular response to nitrogen compound                                                      | 589       | 30          | 16.32    | 1.03E-03 | 2.30E-02 |
| GO:0043555 | regulation of translation in response to stress                                             | 17        | 4           | 0.47     | 1.04E-03 | 2.31E-02 |
| GO:0045947 | negative regulation of translational initiation                                             | 17        | 4           | 0.47     | 1.04E-03 | 2.31E-02 |
| GO:0071824 | protein-DNA complex subunit organization                                                    | 216       | 15          | 5.99     | 1.04E-03 | 2.31E-02 |
| GO:0090257 | regulation of muscle system process                                                         | 239       | 16          | 6.62     | 1.06E-03 | 2.35E-02 |
| GO:0006596 | polyamine biosynthetic process                                                              | 8         | 3           | 0.22     | 1.07E-03 | 2.35E-02 |
| GO:0098974 | postsynaptic actin cytoskeleton organization                                                | 8         | 3           | 0.22     | 1.07E-03 | 2.35E-02 |
| GO:1904714 | regulation of chaperone-mediated autophagy                                                  | 8         | 3           | 0.22     | 1.07E-03 | 2.35E-02 |
| GO:1905446 | regulation of mitochondrial ATP synthesis coupled electron transport                        | 8         | 3           | 0.22     | 1.07E-03 | 2.35E-02 |
| GO:0038093 | Fc receptor signaling pathway                                                               | 173       | 13          | 4.79     | 1.08E-03 | 2.37E-02 |
| GO:0051279 | regulation of release of sequestered calcium ion into cytosol                               | 75        | 8           | 2.08     | 1.09E-03 | 2.37E-02 |
| GO:1901019 | regulation of calcium ion transmembrane transporter activity                                | 75        | 8           | 2.08     | 1.09E-03 | 2.37E-02 |
| GO:0061136 | regulation of proteasomal protein catabolic process                                         | 152       | 12          | 4.21     | 1.09E-03 | 2.37E-02 |
| GO:0032870 | cellular response to hormone stimulus                                                       | 618       | 31          | 17.13    | 1.09E-03 | 2.37E-02 |
| GO:0051693 | actin filament capping                                                                      | 29        | 5           | 0.8      | 1.10E-03 | 2.38E-02 |
| GO:1902230 | negative regulation of intrinsic apoptotic signaling pathway in response to DNA damage      | 29        | 5           | 0.8      | 1.10E-03 | 2.38E-02 |
| GO:1990778 | protein localization to cell periphery                                                      | 263       | 17          | 7.29     | 1.10E-03 | 2.38E-02 |
| GO:0000302 | response to reactive oxygen species                                                         | 218       | 15          | 6.04     | 1.14E-03 | 2.46E-02 |
| GO:0035821 | modification of morphology or physiology of other organism                                  | 153       | 12          | 4.24     | 1.15E-03 | 2.48E-02 |
| GO:0016049 | cell growth                                                                                 | 436       | 24          | 12.08    | 1.15E-03 | 2.48E-02 |
| GO:0006793 | phosphorus metabolic process                                                                | 2901      | 106         | 80.4     | 1.17E-03 | 2.51E-02 |
| GO:0043434 | response to peptide hormone                                                                 | 386       | 22          | 10.7     | 1.18E-03 | 2.51E-02 |
| GO:0042177 | negative regulation of protein catabolic process                                            | 113       | 10          | 3.13     | 1.18E-03 | 2.51E-02 |
| GO:1905477 | positive regulation of protein localization to membrane                                     | 113       | 10          | 3.13     | 1.18E-03 | 2.51E-02 |
| GO:0002433 | immune response-regulating cell surface receptor signaling pathway involved in phagocytosis | 76        | 8           | 2.11     | 1.18E-03 | 2.51E-02 |
| GO:0038096 | Fc-gamma receptor signaling pathway involved in phagocytosis                                | 76        | 8           | 2.11     | 1.18E-03 | 2.51E-02 |
| GO:0016310 | phosphorylation                                                                             | 2075      | 80          | 57.51    | 1.24E-03 | 2.63E-02 |
| GO:0048193 | Golgi vesicle transport                                                                     | 290       | 18          | 8.04     | 1.26E-03 | 2.67E-02 |
| GO:1903169 | regulation of calcium ion transmembrane transport                                           | 134       | 11          | 3.71     | 1.26E-03 | 2.67E-02 |
| GO:0002685 | regulation of leukocyte migration                                                           | 176       | 13          | 4.88     | 1.27E-03 | 2.68E-02 |
| GO:0010543 | regulation of platelet activation                                                           | 30        | 5           | 0.83     | 1.28E-03 | 2.69E-02 |
| GO:0010922 | positive regulation of phosphatase activity                                                 | 30        | 5           | 0.83     | 1.28E-03 | 2.69E-02 |
| GO:0000902 | cell morphogenesis                                                                          | 818       | 38          | 22.67    | 1.29E-03 | 2.71E-02 |
| GO:0032387 | negative regulation of intracellular transport                                              | 60        | 7           | 1.66     | 1.30E-03 | 2.71E-02 |
| GO:0019682 | glyceraldehyde-3-phosphate metabolic process                                                | 18        | 4           | 0.5      | 1.31E-03 | 2.71E-02 |
| GO:0030220 | platelet formation                                                                          | 18        | 4           | 0.5      | 1.31E-03 | 2.71E-02 |
| GO:0032516 | positive regulation of phosphoprotein phosphatase activity                                  | 18        | 4           | 0.5      | 1.31E-03 | 2.71E-02 |
| GO:0036344 | platelet morphogenesis                                                                      | 18        | 4           | 0.5      | 1.31E-03 | 2.71E-02 |
| GO:0042276 | error-prone translesion synthesis                                                           | 18        | 4           | 0.5      | 1.31E-03 | 2.71E-02 |
| GO:0070987 | error-free translesion synthesis                                                            | 18        | 4           | 0.5      | 1.31E-03 | 2.71E-02 |
| GO:0071243 | cellular response to arsenic-containing substance                                           | 18        | 4           | 0.5      | 1.31E-03 | 2.71E-02 |
| GO:0019722 | calcium-mediated signaling                                                                  | 177       | 13          | 4.91     | 1.33E-03 | 2.74E-02 |
| GO:0120036 | plasma membrane bounded cell projection organization                                        | 1254      | 53          | 34.75    | 1.33E-03 | 2.74E-02 |
| GO:0038094 | Fc-gamma receptor signaling pathway                                                         | 78        | 8           | 2.16     | 1.40E-03 | 2.88E-02 |
| GO:0010921 | regulation of phosphatase activity                                                          | 157       | 12          | 4.35     | 1.44E-03 | 2.96E-02 |
| GO:0002504 | antigen processing and presentation of peptide or polysaccharide antigen via MHC class II   | 97        | 9           | 2.69     | 1.47E-03 | 3.01E-02 |
| GO:0010256 | endomembrane system organization                                                            | 343       | 20          | 9.51     | 1.48E-03 | 3.03E-02 |
| GO:0006904 | vesicle docking involved in exocytosis                                                      | 31        | 5           | 0.86     | 1.50E-03 | 3.05E-02 |
| GO:0010039 | response to iron ion                                                                        | 31        | 5           | 0.86     | 1.50E-03 | 3.05E-02 |
| GO:0046685 | response to arsenic-containing substance                                                    | 31        | 5           | 0.86     | 1.50E-03 | 3.05E-02 |
| GO:0042542 | response to hydrogen peroxide                                                               | 137       | 11          | 3.8      | 1.51E-03 | 3.06E-02 |
| GO:0002431 | Fc receptor mediated stimulatory signaling pathway                                          | 79        | 8           | 2.19     | 1.53E-03 | 3.08E-02 |
| GO:0007045 | cell-substrate adherens junction assembly                                                   | 79        | 8           | 2.19     | 1.53E-03 | 3.08E-02 |
| GO:0048041 | focal adhesion assembly                                                                     | 79        | 8           | 2.19     | 1.53E-03 | 3.08E-02 |
| GO:0008360 | regulation of cell shape                                                                    | 117       | 10          | 3.24     | 1.53E-03 | 3.08E-02 |
| GO:0033157 | regulation of intracellular protein transport                                               | 202       | 14          | 5.6      | 1.54E-03 | 3.10E-02 |
| GO:1903050 | regulation of proteolysis involved in cellular protein catabolic process                    | 180       | 13          | 4.99     | 1.55E-03 | 3.11E-02 |
| GO:0045714 | regulation of low-density lipoprotein particle receptor biosynthetic process                | 9         | 3           | 0.25     | 1.57E-03 | 3.13E-02 |
| GO:0071281 | cellular response to iron ion                                                               | 9         | 3           | 0.25     | 1.57E-03 | 3.13E-02 |
| GO:1901844 | regulation of cell communication by electrical coupling involved in cardiac conduction      | 9         | 3           | 0.25     | 1.57E-03 | 3.13E-02 |
| GO:0001558 | regulation of cell growth                                                                   | 370       | 21          | 10.25    | 1.59E-03 | 3.17E-02 |
| GO:0051156 | glucose 6-phosphate metabolic process                                                       | 19        | 4           | 0.53     | 1.62E-03 | 3.22E-02 |
| GO:0010638 | positive regulation of organelle organization                                               | 553       | 28          | 15.33    | 1.64E-03 | 3.26E-02 |
| GO:0010646 | regulation of cell communication                                                            | 3358      | 119         | 93.06    | 1.68E-03 | 3.32E-02 |
| GO:0022604 | regulation of cell morphogenesis                                                            | 397       | 22          | 11       | 1.68E-03 | 3.32E-02 |
| GO:0061061 | muscle structure development                                                                | 608       | 30          | 16.85    | 1.68E-03 | 3.32E-02 |
| GO:0048524 | positive regulation of viral process                                                        | 99        | 9           | 2.74     | 1.70E-03 | 3.35E-02 |
| GO:0055114 | oxidation-reduction process                                                                 | 860       | 39          | 23.83    | 1.73E-03 | 3.39E-02 |
| GO:0030835 | negative regulation of actin filament depolymerization                                      | 32        | 5           | 0.89     | 1.73E-03 | 3.39E-02 |
| GO:1901020 | negative regulation of calcium ion transmembrane transporter activity                       | 32        | 5           | 0.89     | 1.73E-03 | 3.39E-02 |
| GO:0098662 | inorganic cation transmembrane transport                                                    | 583       | 29          | 16.16    | 1.77E-03 | 3.46E-02 |

Supplementary Table S2B: Significant gene ontology categories for expressed genes in platelets

| GO.ID      | Term                                                                        | Annotated | Significant | Expected | pval     | qval     |
|------------|-----------------------------------------------------------------------------|-----------|-------------|----------|----------|----------|
| GO:0032781 | positive regulation of ATPase activity                                      | 47        | 6           | 1.3      | 1.80E-03 | 3.50E-02 |
| GO:0048260 | positive regulation of receptor-mediated endocytosis                        | 47        | 6           | 1.3      | 1.80E-03 | 3.50E-02 |
| GO:0031099 | regeneration                                                                | 183       | 13          | 5.07     | 1.80E-03 | 3.50E-02 |
| GO:0051223 | regulation of protein transport                                             | 639       | 31          | 17.71    | 1.84E-03 | 3.58E-02 |
| GO:0031669 | cellular response to nutrient levels                                        | 206       | 14          | 5.71     | 1.85E-03 | 3.59E-02 |
| GO:0034599 | cellular response to oxidative stress                                       | 277       | 17          | 7.68     | 1.92E-03 | 3.72E-02 |
| GO:0071902 | positive regulation of protein serine/threonine kinase activity             | 302       | 18          | 8.37     | 1.98E-03 | 3.81E-02 |
| GO:0000715 | nucleotide-excision repair, DNA damage recognition                          | 20        | 4           | 0.55     | 1.98E-03 | 3.81E-02 |
| GO:0000717 | nucleotide-excision repair, DNA duplex unwinding                            | 20        | 4           | 0.55     | 1.98E-03 | 3.81E-02 |
| GO:0010801 | negative regulation of peptidyl-threonine phosphorylation                   | 20        | 4           | 0.55     | 1.98E-03 | 3.81E-02 |
| GO:0006007 | glucose catabolic process                                                   | 33        | 5           | 0.91     | 2.00E-03 | 3.84E-02 |
| GO:0051452 | intracellular pH reduction                                                  | 48        | 6           | 1.33     | 2.01E-03 | 3.84E-02 |
| GO:1901653 | cellular response to peptide                                                | 352       | 20          | 9.76     | 2.01E-03 | 3.84E-02 |
| GO:1903362 | regulation of cellular protein catabolic process                            | 208       | 14          | 5.76     | 2.03E-03 | 3.88E-02 |
| GO:0002684 | positive regulation of immune system process                                | 955       | 42          | 26.47    | 2.07E-03 | 3.95E-02 |
| GO:0065004 | protein-DNA complex assembly                                                | 186       | 13          | 5.15     | 2.08E-03 | 3.96E-02 |
| GO:0051881 | regulation of mitochondrial membrane potential                              | 65        | 7           | 1.8      | 2.09E-03 | 3.96E-02 |
| GO:1904427 | positive regulation of calcium ion transmembrane transport                  | 65        | 7           | 1.8      | 2.09E-03 | 3.96E-02 |
| GO:0034097 | response to cytokine                                                        | 1104      | 47          | 30.6     | 2.17E-03 | 4.11E-02 |
| GO:0030836 | positive regulation of actin filament depolymerization                      | 10        | 3           | 0.28     | 2.19E-03 | 4.12E-02 |
| GO:0045713 | low-density lipoprotein particle receptor biosynthetic process              | 10        | 3           | 0.28     | 2.19E-03 | 4.12E-02 |
| GO:0099188 | postsynaptic cytoskeleton organization                                      | 10        | 3           | 0.28     | 2.19E-03 | 4.12E-02 |
| GO:0007162 | negative regulation of cell adhesion                                        | 257       | 16          | 7.12     | 2.23E-03 | 4.16E-02 |
| GO:0045851 | pH reduction                                                                | 49        | 6           | 1.36     | 2.23E-03 | 4.16E-02 |
| GO:0002351 | serotonin production involved in inflammatory response                      | 3         | 2           | 0.08     | 2.26E-03 | 4.16E-02 |
| GO:0002442 | serotonin secretion involved in inflammatory response                       | 3         | 2           | 0.08     | 2.26E-03 | 4.16E-02 |
| GO:0002554 | serotonin secretion by platelet                                             | 3         | 2           | 0.08     | 2.26E-03 | 4.16E-02 |
| GO:0010710 | regulation of collagen catabolic process                                    | 3         | 2           | 0.08     | 2.26E-03 | 4.16E-02 |
| GO:0015684 | ferrous iron transport                                                      | 3         | 2           | 0.08     | 2.26E-03 | 4.16E-02 |
| GO:0016480 | negative regulation of transcription by RNA polymerase III                  | 3         | 2           | 0.08     | 2.26E-03 | 4.16E-02 |
| GO:0019322 | pentose biosynthetic process                                                | 3         | 2           | 0.08     | 2.26E-03 | 4.16E-02 |
| GO:0031509 | telomeric heterochromatin assembly                                          | 3         | 2           | 0.08     | 2.26E-03 | 4.16E-02 |
| GO:0097577 | sequestering of iron ion                                                    | 3         | 2           | 0.08     | 2.26E-03 | 4.16E-02 |
| GO:1902958 | positive regulation of mitochondrial electron transport, NADH to ubiquinone | 3         | 2           | 0.08     | 2.26E-03 | 4.16E-02 |
| GO:1903874 | ferrous iron transmembrane transport                                        | 3         | 2           | 0.08     | 2.26E-03 | 4.16E-02 |
| GO:1904715 | negative regulation of chaperone-mediated autophagy                         | 3         | 2           | 0.08     | 2.26E-03 | 4.16E-02 |
| GO:0032388 | positive regulation of intracellular transport                              | 188       | 13          | 5.21     | 2.28E-03 | 4.19E-02 |
| GO:0006734 | NADH metabolic process                                                      | 34        | 5           | 0.94     | 2.29E-03 | 4.20E-02 |
| GO:0099003 | vesicle-mediated transport in synapse                                       | 166       | 12          | 4.6      | 2.30E-03 | 4.21E-02 |
| GO:0046034 | ATP metabolic process                                                       | 235       | 15          | 6.51     | 2.39E-03 | 4.35E-02 |
| GO:0002082 | regulation of oxidative phosphorylation                                     | 21        | 4           | 0.58     | 2.39E-03 | 4.35E-02 |
| GO:0051125 | regulation of actin nucleation                                              | 21        | 4           | 0.58     | 2.39E-03 | 4.35E-02 |
| GO:0048869 | cellular developmental process                                              | 3826      | 132         | 106.03   | 2.42E-03 | 4.38E-02 |
| GO:0002478 | antigen processing and presentation of exogenous peptide antigen            | 167       | 12          | 4.63     | 2.42E-03 | 4.38E-02 |
| GO:0006457 | protein folding                                                             | 167       | 12          | 4.63     | 2.42E-03 | 4.38E-02 |
| GO:0000422 | autophagy of mitochondrion                                                  | 50        | 6           | 1.39     | 2.48E-03 | 4.47E-02 |
| GO:0061726 | mitochondrion disassembly                                                   | 50        | 6           | 1.39     | 2.48E-03 | 4.47E-02 |
| GO:1903201 | regulation of oxidative stress-induced cell death                           | 67        | 7           | 1.86     | 2.48E-03 | 4.47E-02 |
| GO:0051250 | negative regulation of lymphocyte activation                                | 125       | 10          | 3.46     | 2.51E-03 | 4.52E-02 |
| GO:2001235 | positive regulation of apoptotic signaling pathway                          | 168       | 12          | 4.66     | 2.54E-03 | 4.56E-02 |
| GO:0043666 | regulation of phosphoprotein phosphatase activity                           | 105       | 9           | 2.91     | 2.55E-03 | 4.57E-02 |
| GO:0015682 | ferric iron transport                                                       | 35        | 5           | 0.97     | 2.61E-03 | 4.66E-02 |
| GO:0033572 | transferrin transport                                                       | 35        | 5           | 0.97     | 2.61E-03 | 4.66E-02 |
| GO:0072512 | trivalent inorganic cation transport                                        | 35        | 5           | 0.97     | 2.61E-03 | 4.66E-02 |
| GO:0042493 | response to drug                                                            | 910       | 40          | 25.22    | 2.65E-03 | 4.72E-02 |
| GO:0034332 | adherens junction organization                                              | 126       | 10          | 3.49     | 2.66E-03 | 4.73E-02 |
| GO:0071345 | cellular response to cytokine stimulus                                      | 1027      | 44          | 28.46    | 2.67E-03 | 4.73E-02 |
| GO:0032101 | regulation of response to external stimulus                                 | 767       | 35          | 21.26    | 2.67E-03 | 4.73E-02 |
| GO:0019884 | antigen processing and presentation of exogenous antigen                    | 169       | 12          | 4.68     | 2.67E-03 | 4.73E-02 |
| GO:1903747 | regulation of establishment of protein localization to mitochondrion        | 68        | 7           | 1.88     | 2.71E-03 | 4.79E-02 |
| GO:0030705 | cytoskeleton-dependent intracellular transport                              | 148       | 11          | 4.1      | 2.79E-03 | 4.92E-02 |
| GO:0043244 | regulation of protein complex disassembly                                   | 87        | 8           | 2.41     | 2.82E-03 | 4.97E-02 |

Supplementary Table S3: eQTLs significant in both Platelets and MKs

| Chromosome | Position  | Gene         | MK    |          | Platelet |          | GTEx eGene?   |
|------------|-----------|--------------|-------|----------|----------|----------|---------------|
|            |           |              | Beta  | q-value  | Beta     | q-value  |               |
| 1          | 12043717  | MFN2         | -0.35 | 3.4E-33  | -1.68    | 2.3E-133 | No            |
| 1          | 25561667  | TMEM50A      | 0.17  | 9.6E-05  | 0.24     | 8.6E-10  | Yes           |
| 1          | 25561667  | RHD          | 0.65  | 1.0E-22  | 0.54     | 7.9E-37  | Yes           |
| 1          | 28219658  | RPA2         | -0.28 | 4.1E-07  | -0.26    | 4.5E-13  | Yes           |
| 1          | 38465315  | FHL3         | -0.32 | 2.9E-09  | -1.47    | 2.5E-110 | Yes           |
| 1          | 39662654  | MACF1        | 0.20  | 1.0E-05  | 0.11     | 1.2E-08  | No            |
| 1          | 45476663  | UROD         | 0.31  | 1.4E-16  | 0.38     | 4.9E-55  | Yes           |
| 1          | 110236383 | GSTM1        | -1.45 | 5.5E-17  | -0.82    | 9.1E-31  | Not available |
| 1          | 110282972 | GSTM3        | 0.51  | 6.2E-28  | 0.17     | 1.3E-07  | Yes           |
| 1          | 156869714 | PEAR1        | 0.12  | 3.6E-02  | 0.18     | 1.5E-09  | No            |
| 2          | 36808350  | FEZ2         | 0.17  | 4.0E-03  | 0.14     | 2.4E-07  | No            |
| 2          | 65283972  | CEP68        | -0.35 | 2.6E-26  | -0.32    | 1.5E-63  | Yes           |
| 2          | 224874874 | SERPINE2     | 0.52  | 2.2E-12  | 0.52     | 3.2E-95  | Yes           |
| 2          | 242645466 | ING5         | 0.70  | 1.1E-63  | 0.51     | 8.9E-129 | No            |
| 3          | 15308409  | SH3BP5       | -0.92 | 6.6E-08  | -0.64    | 3.9E-16  | No            |
| 3          | 71829242  | PROK2        | 0.50  | 8.2E-07  | 0.61     | 2.8E-45  | No            |
| 4          | 25863375  | SEL1L3       | 0.29  | 8.7E-13  | 0.40     | 2.4E-12  | Yes           |
| 4          | 38960263  | KLHL5        | 1.02  | 7.8E-61  | 1.19     | 1.5E-91  | No            |
| 4          | 39446549  | RPL9         | -0.53 | 2.5E-76  | -0.31    | 2.4E-40  | Yes           |
| 5          | 148725821 | PCYOX1L      | 0.19  | 1.6E-15  | 0.20     | 3.3E-66  | No            |
| 5          | 150157111 | SMIM3        | -0.37 | 1.8E-03  | -0.41    | 6.9E-08  | No            |
| 5          | 177554780 | RMND5B       | -0.19 | 2.2E-05  | -0.39    | 2.7E-36  | No            |
| 6          | 2783913   | WRNIP1       | 0.21  | 9.2E-08  | 0.35     | 1.2E-11  | No            |
| 6          | 10723193  | TMEM14C      | 0.21  | 2.2E-03  | 0.62     | 8.1E-23  | No            |
| 6          | 30457732  | HLA-E        | -1.36 | 1.1E-43  | -1.54    | 2.2E-15  | No            |
| 6          | 86387888  | SNHG5        | -1.25 | 2.5E-169 | 0.25     | 2.7E-53  | Yes           |
| 6          | 99465262  | FBXL4        | -0.38 | 8.8E-41  | -0.35    | 1.6E-148 | No            |
| 6          | 139350182 | ABRACL       | 0.13  | 6.0E-04  | 0.18     | 2.0E-25  | Yes           |
| 6          | 160211259 | MRPL18       | -0.12 | 3.6E-03  | -0.33    | 9.9E-32  | Yes           |
| 7          | 642774    | LOC101926963 | 0.46  | 3.1E-04  | 0.33     | 4.0E-12  | Not available |
| 7          | 16791225  | TSPAN13      | 0.24  | 8.0E-04  | 0.53     | 6.7E-24  | No            |
| 7          | 128790310 | TSPAN33      | 0.49  | 9.7E-54  | 0.12     | 1.3E-03  | No            |
| 8          | 42010602  | AP3M2        | -0.19 | 5.9E-14  | 0.10     | 2.3E-10  | Yes           |
| 9          | 99192919  | HABP4        | -0.49 | 4.4E-44  | -0.93    | 4.5E-45  | Not available |
| 10         | 71218646  | TSPAN15      | -0.55 | 6.0E-29  | -0.38    | 1.0E-22  | No            |
| 10         | 73655350  | PSAP         | 0.23  | 4.0E-09  | 0.45     | 2.8E-40  | No            |
| 10         | 121037154 | GRK5         | 0.28  | 4.2E-04  | 0.30     | 2.0E-11  | No            |
| 11         | 18537800  | TSG101       | -0.10 | 7.6E-09  | -0.12    | 1.3E-28  | No            |
| 11         | 65644027  | CTSW         | -1.13 | 1.1E-29  | 0.87     | 2.7E-53  | Yes           |
| 11         | 75897374  | WNT11        | -0.26 | 2.9E-06  | -0.25    | 9.2E-22  | Yes           |
| 12         | 56435929  | RPS26        | 0.66  | 1.3E-24  | 0.54     | 1.1E-46  | Yes           |
| 12         | 122216910 | RHOF         | 0.73  | 5.3E-12  | 1.03     | 3.9E-54  | No            |
| 14         | 65796846  | FUT8-AS1     | -0.50 | 1.6E-36  | -0.20    | 5.7E-30  | Not available |
| 15         | 28999128  | WHAMMP2      | 0.31  | 1.7E-15  | 1.12     | 7.0E-25  | No            |
| 15         | 52498360  | LOC100129973 | -0.36 | 7.4E-04  | -0.46    | 7.5E-25  | Not available |
| 15         | 65065920  | BPMS2        | -0.49 | 1.3E-08  | -1.48    | 5.2E-30  | Yes           |
| 15         | 80235014  | C15orf37     | -0.24 | 2.4E-15  | -0.42    | 4.6E-45  | No            |
| 15         | 80447911  | FAH          | 0.16  | 2.2E-08  | 0.23     | 2.4E-18  | No            |
| 15         | 99660664  | SYNM         | 0.28  | 7.5E-05  | 0.46     | 5.0E-43  | No            |
| 16         | 87892024  | SLC7A5       | 0.35  | 7.5E-11  | 0.32     | 1.7E-55  | No            |
| 17         | 73828174  | UNC13D       | 0.24  | 3.9E-05  | 0.19     | 5.2E-10  | No            |
| 17         | 80696692  | FN3K         | 0.61  | 8.3E-35  | 0.46     | 4.7E-49  | Yes           |
| 19         | 1400866   | GAMT         | -0.37 | 4.2E-05  | -0.65    | 1.0E-94  | No            |
| 19         | 14492219  | CD97         | -0.32 | 2.8E-02  | -0.29    | 3.3E-06  | Yes           |
| 19         | 38787965  | PPP1R14A     | 0.27  | 2.8E-03  | 0.47     | 4.6E-26  | No            |
| 20         | 633968    | SRXN1        | -0.21 | 5.2E-03  | -0.30    | 6.6E-30  | Yes           |
| 20         | 33872585  | EIF6         | 0.17  | 3.1E-03  | 0.40     | 7.1E-07  | No            |



Supplementary Table S4: Full results from GWAS catalog lookup of significant eQTL results

| Chromosome | Position | eQTL          |         | eQTL Beta (MK) | eQTL q-value (MK) | eQTL Beta (Platelet) | eQTL q-value (Platelet) | PubMed ID | First Author | Journal   | Trait                       | Strongest Risk Allele | GWAS odds    |               |               |                     |
|------------|----------|---------------|---------|----------------|-------------------|----------------------|-------------------------|-----------|--------------|-----------|-----------------------------|-----------------------|--------------|---------------|---------------|---------------------|
|            |          | Effect Allele | Gene    |                |                   |                      |                         |           |              |           |                             |                       | GWAS p-value | ratio or beta | GWAS 95% CI   |                     |
| chr15      | 63341996 | T             | TPM1    | -              | -                 | -0.33                | 2.70E-28                | 27863252  | Astle WJ     | Cell      | Platelet distribution width | rs11071720-C          | 7.00E-34     | 0.05          | [0.04-0.055]  | unit decrease       |
| chr2       | 31477838 | G             | EHD3    | -              | -                 | -0.17                | 1.61E-06                | 27863252  | Astle WJ     | Cell      | Platelet count              | rs655029-A            | 9.00E-73     | 0.07          | [0.066-0.081] | unit increase       |
| chr2       | 31477838 | G             | EHD3    | -              | -                 | -0.17                | 1.61E-06                | 27863252  | Astle WJ     | Cell      | Plateletcrit                | rs655029-A            | 1.00E-18     | 0.04          | [0.028-0.044] | unit increase       |
| chr2       | 31477838 | G             | EHD3    | -              | -                 | -0.17                | 1.61E-06                | 27863252  | Astle WJ     | Cell      | Mean platelet volume        | rs655029-A            | 8.00E-109    | 0.09          | [0.082-0.097] | unit decrease       |
| chr2       | 31477838 | G             | EHD3    | -              | -                 | -0.17                | 1.61E-06                | 27863252  | Astle WJ     | Cell      | Platelet distribution width | rs655029-A            | 2.00E-225    | 0.13          | [0.12-0.14]   | unit decrease       |
| chr4       | 6857278  | T             | TBC1D14 | -              | -                 | 0.13                 | 2.25E-06                | 29403010  | Kanai M      | Nat Genet | Platelet count              | rs6836941-?           | 3.00E-09     | 0.03          | [0.018-0.035] | unit decrease novel |
| chr4       | 57767327 | T             | POLR2B  | -              | -                 | 0.06                 | 5.81E-03                | 27863252  | Astle WJ     | Cell      | Platelet count              | rs7665147-A           | 2.00E-11     | 0.03          | [0.022-0.041] | unit decrease       |



## Supplementary Figures

### Supplementary Figure legends

#### **Supplementary Figure S1. Manhattan plots of eQTL results.**

Each dot on the two Manhattan plot signifies an eQTL. Genomic coordinates by chromosome are displayed along the x-axis and the negative logarithm of the association p-value for each eQTL is displayed on the y-axis. Results for MKs are displayed in panel (A) and results for platelets are displayed in panel (B). Results are represented by the peak SNP per gene based on eigenMT software. Triangular shaped points indicate that the raw p-values of the corresponding eQTLs was lower than  $10^{-150}$ . Color is used to distinguish between chromosomes.

#### **Supplementary Figure S2. Variability of expressed genes.**

Scatterplot of standard deviations among 4,595 expressed genes in MKs and platelets. We observe in 90.75% of genes the standard deviation of expression values is higher in MKs compared to platelets.

Supplementary Figure S1: Manhattan plots of eQTL results.

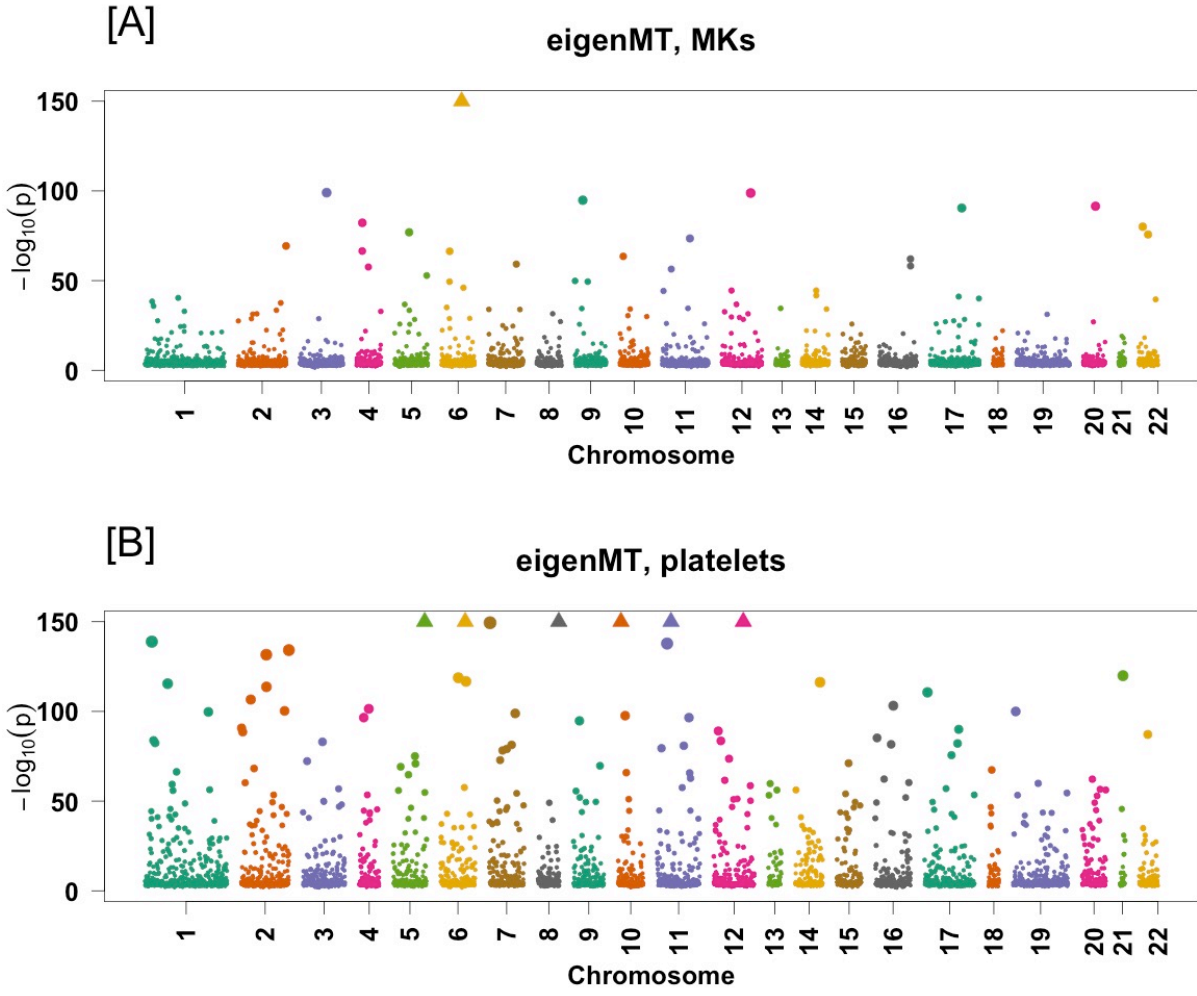

Supplementary Figure S2. Variability of expressed genes.

Scatterplot of standard deviations (SD) for genes

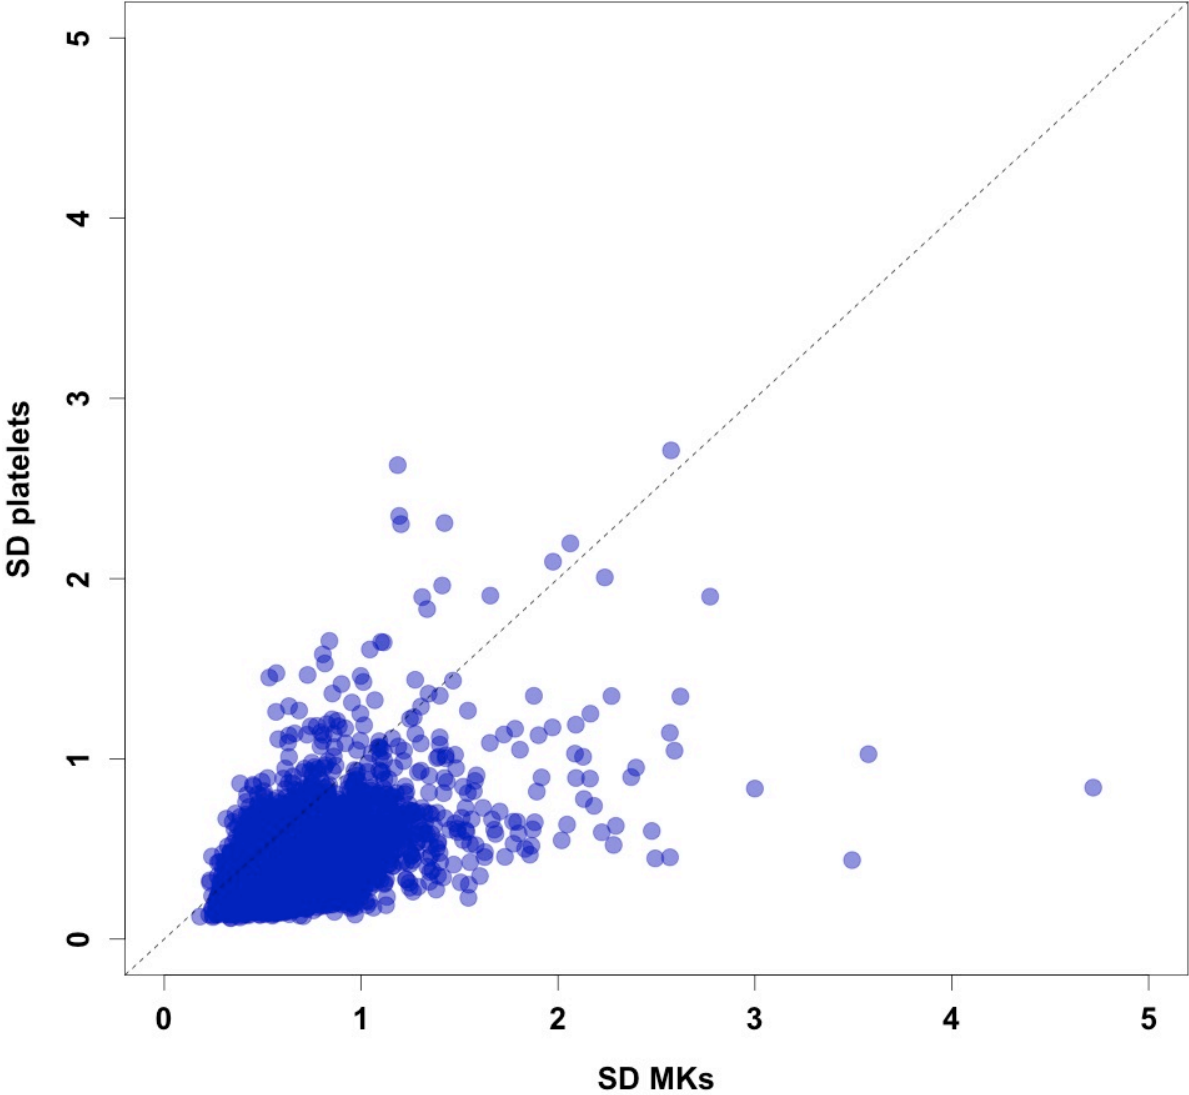

1. Vaidya D, Yanek LR, Moy TF, Pearson TA, Becker LC, Becker DM. Incidence of coronary artery disease in siblings of patients with premature coronary artery disease: 10 years of follow-up. *Am J Cardiol.* 2007;100(9):1410-1415.
2. Becker LC, Becker DM, Pearson TA, Fintel DJ, Links J, Frank TL. Screening of asymptomatic siblings of patients with premature coronary artery disease. *Circulation.* 1987;75(3 Pt 2):1114-17.
3. Becker DM, Segal J, Vaidya D, et al. Sex differences in platelet reactivity and response to low-dose aspirin therapy. *JAMA.* 2006;295(12):1420-1427.
4. Liu Y, Wang Y, Gao Y, et al. Efficient generation of megakaryocytes from human induced pluripotent stem cells using food and drug administration-approved pharmacological reagents. *Stem Cells Transl Med.* 2015;4(4):309-319.
5. al. Te. Sequencing of 53,831 diverse genomes from the NHLBI TOPMed Program. *BioRxiv.* 2019;bioRxiv 563866; doi: <https://doi.org/10.1101/563866>.
6. Kim D, Langmead B, Salzberg SL. HISAT: a fast spliced aligner with low memory requirements. *Nat Methods.* 2015;12(4):357-360.
7. Pertea M, Pertea GM, Antonescu CM, Chang TC, Mendell JT, Salzberg SL. StringTie enables improved reconstruction of a transcriptome from RNA-seq reads. *Nat Biotechnol.* 2015;33(3):290-295.
8. R Core Team (2018). R: A language and environment for statistical computing. R Foundation for Statistical Computing, Vienna, Austria.
9. Frazee AC, Pertea G, Jaffe AE, Langmead B, Salzberg SL, Leek JT. Ballgown bridges the gap between transcriptome assembly and expression analysis. *Nat Biotechnol.* 2015;33(3):243-246.
10. Pertea M, Kim D, Pertea GM, Leek JT, Salzberg SL. Transcript-level expression analysis of RNA-seq experiments with HISAT, StringTie and Ballgown. *Nat Protoc.* 2016;11(9):1650-1667.
11. <https://github.com/gpertea/gffcompare>
12. Eicher JD, Wakabayashi Y, Vitseva O, et al. Characterization of the platelet transcriptome by RNA sequencing in patients with acute myocardial infarction. *Platelets.* 2016;27(3):230-239.
13. Londin ER, Hatzimichael E, Loher P, et al. The human platelet: strong transcriptome correlations among individuals associate weakly with the platelet proteome. *Biol Direct.* 2014;9:3.
14. Kammers K, Taub MA, Ruczinski I, et al. Integrity of Induced Pluripotent Stem Cell (iPSC) Derived Megakaryocytes as Assessed by Genetic and Transcriptomic Analysis. *PLoS One.* 2017;12(1):e0167794.
15. Shabalina AA. Matrix eQTL: ultra fast eQTL analysis via large matrix operations. *Bioinformatics.* 2012;28(10):1353-1358.
16. Schwarzer G. meta: An R package for meta-analysis. *R News.* 2007;7(3):40-45.
17. Davis JR, Fresard L, Knowles DA, et al. An Efficient Multiple-Testing Adjustment for eQTL Studies that Accounts for Linkage Disequilibrium between Variants. *Am J Hum Genet.* 2016;98(1):216-224.
18. Storey JD, Tibshirani R. Statistical significance for genomewide studies. *Proc Natl Acad Sci U S A.* 2003;100(16):9440-9445.
19. Petersen R, Lambourne JJ, Javierre BM, et al. Platelet function is modified by common sequence variation in megakaryocyte super enhancers. *Nat Commun.* 2017;8:16058.

20. Alexa A RJ. topGO: Enrichment Analysis for Gene Ontology. 2019.
21. Liberzon A, Subramanian A, Pinchback R, Thorvaldsdottir H, Tamayo P, Mesirov JP. Molecular signatures database (MSigDB) 3.0. *Bioinformatics*. 2011;27(12):1739-1740.
22. Iotchkova V, Huang J, Morris JA, et al. Discovery and refinement of genetic loci associated with cardiometabolic risk using dense imputation maps. *Nat Genet*. 2016;48(11):1303-1312.
23. Read RW, Schlauch KA, Elhanan G, et al. GWAS and PheWAS of red blood cell components in a Northern Nevadan cohort. *PLoS One*. 2019;14(6):e0218078.
24. Astle WJ, Elding H, Jiang T, et al. The Allelic Landscape of Human Blood Cell Trait Variation and Links to Common Complex Disease. *Cell*. 2016;167(5):1415-1429 e1419.
25. Shameer K, Denny JC, Ding K, et al. A genome- and phenome-wide association study to identify genetic variants influencing platelet count and volume and their pleiotropic effects. *Hum Genet*. 2014;133(1):95-109.
26. Gieger C, Radhakrishnan A, Cvejic A, et al. New gene functions in megakaryopoiesis and platelet formation. *Nature*. 2011;480(7376):201-208.
27. Soranzo N, Spector TD, Mangino M, et al. A genome-wide meta-analysis identifies 22 loci associated with eight hematological parameters in the HaemGen consortium. *Nat Genet*. 2009;41(11):1182-1190.
28. Soranzo N, Rendon A, Gieger C, et al. A novel variant on chromosome 7q22.3 associated with mean platelet volume, counts, and function. *Blood*. 2009;113(16):3831-3837.
29. Qayyum R, Snively BM, Ziv E, et al. A meta-analysis and genome-wide association study of platelet count and mean platelet volume in african americans. *PLoS Genet*. 2012;8(3):e1002491.
30. Li J, Glessner JT, Zhang H, et al. GWAS of blood cell traits identifies novel associated loci and epistatic interactions in Caucasian and African-American children. *Hum Mol Genet*. 2013;22(7):1457-1464.
31. Oh JH, Kim YK, Moon S, Kim YJ, Kim BJ. Genome-wide association study identifies candidate Loci associated with platelet count in koreans. *Genomics Inform*. 2014;12(4):225-230.
32. Schick UM, Jain D, Hodonsky CJ, et al. Genome-wide Association Study of Platelet Count Identifies Ancestry-Specific Loci in Hispanic/Latino Americans. *Am J Hum Genet*. 2016;98(2):229-242.
33. Kanai M, Akiyama M, Takahashi A, et al. Genetic analysis of quantitative traits in the Japanese population links cell types to complex human diseases. *Nat Genet*. 2018;50(3):390-400.
34. Wojcik GL, Graff M, Nishimura KK, et al. Genetic analyses of diverse populations improves discovery for complex traits. *Nature*. 2019;570(7762):514-518.
35. Ahola-Olli AV, Wurtz P, Havulinna AS, et al. Genome-wide Association Study Identifies 27 Loci Influencing Concentrations of Circulating Cytokines and Growth Factors. *Am J Hum Genet*. 2017;100(1):40-50.
36. Watkins NA, Gusnanto A, de Bono B, et al. A HaemAtlas: characterizing gene expression in differentiated human blood cells. *Blood*. 2009;113(19):e1-9.
37. Bray PF, McKenzie SE, Edelstein LC, et al. The complex transcriptional landscape of the anucleate human platelet. *BMC Genomics*. 2013;14:1.

38. Simon LM, Chen ES, Edelstein LC, et al. Integrative Multi-omic Analysis of Human Platelet eQTLs Reveals Alternative Start Site in Mitofusin 2. *Am J Hum Genet.* 2016;98(5):883-897.
39. Simon LM, Edelstein LC, Nagalla S, et al. Human platelet microRNA-mRNA networks associated with age and gender revealed by integrated plateletomics. *Blood.* 2014;123(16):e37-
